# Supplementary material for: Changing magma dynamics and plumbing system architecture at an explosive–effusive transition: the case of Nisyros volcano (Greece)
Source: Copernicus journal article supplement (doi:10.5194/ejm-37-793-2025), 2025-10-22
Supplement: Supplementary file 1 [file SupplementaryTables S1-S5.xlsx]

## Sheet: TableS1-samples and petrography
Supplementary Table S1 - Location, field evidene and short petrographic description of the analysed selected samples from the Upper Pumice deposit and Post Caldera Dome (Nisyros, Greece)
Sample	Sampling location	Depositional Unit	Lithology	Sample size (maximum diameter)	Sample Texture	CRC Type	Paragenesis	plg/femic	Cristallinity (vol. %)	Vacuolarity (vol. %)	Glass (vol. %)	Crystal Aggregates	(Micro-) Enclaves	Reaction rim	ph+mph in CRC (vol. %)		SiO2 wt.% water free
Upper Pumice
NIS315	Pali - main road	Fallout	Pumice	c.ca 10 cm	low porphyritic	-	Plg, Opx, Cpx, Ox	90/10	3	50	47						71.43
NIS317	Emborion cemetery	Fallout	Pumice	c.ca 10 cm	low porphyritic	-	Plg, Opx, Cpx, Ox	90/10	5	50	45						-
NIS316e	Pali - main road	Fallout	Crystal rich clast	10 cm	high vesicular, microcrystalline	Type-B	Plg, Cpx, Ox, Opx, Amph	95/5	15	65	20				1		-
NIS317	Emborion cemetery	Fallout	Crystal rich clast	10 cm		Type-A	Plg, Cpx, Ox, Opx, Amph	90/10	30	50	20						-
NIS318	Emborion cemetery	Fallout	Crystal rich clast	15 cm		Type-B	Plg, Cpx, Ox, Opx, Amph	70/30	25	55	20				1		-
NIS357	Emborion cemetery	Fallout	Crystal rich clast	25 cm	low vesicular, aphyric	Type-B	Plg, Opx, Cpx, Amph, Ox	75/25	55	25	20	ü		ü	10		-
NIS368	Emborion cemetery	Fallout	Crystal rich clast	7 cm		Type-B	Plg, Cpx, Ox, Ol, Opx, Amph	75/25	40	45	15				10		-
NIS369	Emborion cemetery	Fallout	Crystal rich clast	10 cm		Type-A	Plg, Cpx, Ox, Ol, Opx, Amph	80/20	35	50	15						-
NIS420b	Cape Katzouni	Lag-breccia	Crystal rich clast	4-10 cm	vesicular, aphyric/microcrystalline	Type-A	Plg, Cpx, Ox, Opx, Amph	85/15	45	40	15				5		-
NIS424	Cape Katzouni	Lag-breccia	Crystal rich clast	40 cm	vesicular, microcrystalline	Type-B	Plg, Cpx, Ox, Opx, Amph	65/35	40	45	15	ü		ü	5		56.65
NIS428	Cape Katzouni	Lag-breccia	Crystal rich clast	15 cm	high vesicular, microcrystalline	Type-C	Plg, Cpx, Ox, Ol, Opx, Amph	50/50	40	45	15				5		-
NIS430	Cape Katzouni	Lag-breccia	Crystal rich clast	10 cm	low vesicular, aphyric/microcrystalline	Type-B	Plg, Cpx, Ox, Ol, Amph	60/40	45	40	15			ü	10		-
Post Caldera Dome						Size of the network						Mafic Aggregate	(Micro-) Enclaves	Chilled margin	Porphiritic index
NIS264	Ring road	Karaviotis	Lava dome		Porphyritic		Plg, Cpx, Ox, Opx, Olv	80/20	50	20	30	ü	üü		25-30		68.81
NIS266	Ring road	Karaviotis	Enclave	20 cm	Sub-aphiric/dictytaxitic	fine	Plg, Amph, Cpx, Ox	50/50	70	20	10	ü		ü	1		56.47
NIS267	Ring road	Karaviotis	Enclave	20 cm	Sub-aphiric/dictytaxitic	fine	Plg, Amph, Cpx, Ox	50/50	70	22	8	ü		ü	1		56.43
NIS336	Katheros lobe	Karaviotis	Enclave	15 cm	Low porphiritic/dictytaxitic	fine	Plg, Amph, Cpx, Olv, Ox	50/50	75	20	5			ü	3		57.74
NIS278	Ring road	Trapesina	Enclave	40 cm	Porphiritic/dictytaxitic	fine	Plg, Amph, Cpx, Olv, Ox	50/50	75	20	5			ü	5		-
NIS279	Ring road	Trapesina	Enclave	30 cm	Low porphiritic/dictytaxitic	fine	Plg, Amph, Cpx, Olv, Ox	50/50	75	20	5				3		59.2
NIS283	Ring road	Trapesina	Enclave	5 cm	Aphiric/micro-crystalline	coarse	Plg, Amph, Cpx, Ox	50/50	70	15	10				-		-
NIS286	Ring road	Trapesina	Lava dome	-	Porphyritic	-	Plg, Cpx, Ox, Opx	80/20	50	20	30	ü	ü		20-30		70.43
NIS288	Pathway to the top	Nifios	Lava dome	-	Porphyritic	-	Plg, Cpx, Ox, Opx	80/20	50	20	30	ü	üü		20		68.77
NIS287	Top north lobe	Profitisilias	Lava dome	-	Porphyritic	-	Plg, Cpx, Ox, Opx	80/20	50	20	30		ü		20-25		70.22
NIS293	Top north lobe	Profitisilias	Enclave	70 cm	Porphiritic/quasi dictytaxitic	coarse	Plg, Amph, Cpx, Olv, Ox	45/55	70	22	8	ü		ü	5		56.19
NIS297	Top south lobe	Profitisilias	Enclave	7 cm	Low porphiritic/dictytaxitic	fine	Plg, Amph, Cpx, Olv, Ox	50/50	75	20	5			ü	3		-
NIS299	Lakki Plain	Sterna	Lava dome	-	Porphyritic	-	Plg, Cpx, Ox, Opx	80/20	50	20	30		üü		30		71.12
NIS304	Caldera rim side	Boriatico	Lava dome	-	Porphyritic	-	Plg, Cpx, Ox, Opx	75/25	55	10	35		üüü		15-20		6.58
NIS310	Caldera rim side	Boriatico	Enclave	100 cm	Sub-aphiric/quasi dictytaxitic	coarse	Plg, Amph, Cpx, Olv, Ox	50/50	70	22	8				1		56.48
NIS324	Caldera rim side	Boriatico	Enclave	8 cm	Aphiric/micro-crystalline	coarse	Plg, Amph, Cpx, Ox	55/45	75	20	5				-		-
NIS327	Lakki Plain	Boriatico	Enclave	15 cm	Porphiritic/dictytaxitic	fine	Plg, Amph, Cpx, Olv, Ox	55/45	75	20	5			ü	5		-

## Sheet: TableS2a-PCD Olivine
Supplementary Table S2a - Olivine compositon of the Upper Pumice (UP) and Post Caldera Dome (PCD) lavas and enclaves
Unit	UP	UP	UP	UP	UP	UP	UP	UP	UP	UP	UP		PCD	PCD	PCD	PCD	PCD	PCD	PCD	PCD	PCD	PCD	PCD	PCD	PCD	PCD	PCD	PCD	PCD	PCD	PCD	PCD	PCD	PCD	PCD	PCD	PCD	PCD	PCD	PCD	PCD	PCD	PCD	PCD	PCD	PCD	PCD	PCD	PCD
Lithology	CRC	CRC	CRC	CRC	CRC	CRC	CRC	CRC	CRC	CRC	CRC		enlcave	enlcave	enlcave	enlcave	enlcave	enlcave	enlcave	enlcave	enlcave	enlcave	enlcave	enlcave	enlcave	enlcave	enlcave	enlcave	enlcave	enlcave	enlcave	enlcave	enlcave	enlcave	enlcave	enlcave	enlcave	enlcave	enlcave	enlcave	enlcave	dome lava	dome lava	dome lava	dome lava	dome lava	dome lava	enlcave	enlcave
Deposit	Fallout	Fallout	Lag-breccia	Lag-breccia	Lag-breccia	Lag-breccia	Lag-breccia	Lag-breccia	Lag-breccia	Lag-breccia	Lag-breccia		Profitis Elias	Profitis Elias	Profitis Elias	Profitis Elias	Trapesina	Trapesina	Trapesina	Trapesina	Trapesina	Trapesina	Trapesina	Trapesina	Sterna	Sterna	Sterna	Sterna	Karaviotis	Karaviotis	Karaviotis	Karaviotis	Karaviotis	Karaviotis	Karaviotis	Karaviotis	Karaviotis	Karaviotis	Karaviotis	Karaviotis	Karaviotis	Karaviotis	Karaviotis	Karaviotis	Karaviotis	Karaviotis	Karaviotis	Boriatico	Boriatico
CRC-Type	A	A	B	B	B	B	B	B	B	B	B		Older PCD system	Older PCD system	Older PCD system	Older PCD system	Older PCD system	Older PCD system	Older PCD system	Older PCD system	Older PCD system	Older PCD system	Older PCD system	Older PCD system	Older PCD system	Older PCD system	Older PCD system	Older PCD system	Younger PCD system	Younger PCD system	Younger PCD system	Younger PCD system	Younger PCD system	Younger PCD system	Younger PCD system	Younger PCD system	Younger PCD system	Younger PCD system	Younger PCD system	Younger PCD system	Younger PCD system	Younger PCD system	Younger PCD system	Younger PCD system	Younger PCD system	Younger PCD system	Younger PCD system	Younger PCD system	Younger PCD system
Sample	NIS361	NIS361	NIS424	NIS424	NIS424	NIS424	NIS424	NIS424	NIS424	NIS424	NIS424		NIS287b	NIS293a	NIS293a	NIS297	NIS278b	NIS278a	NIS278a	NIS278a	NIS278a	NIS278a	NIS278a	NIS278a	NIS299b	NIS299b	NIS299b	NIS299b	NIS267b	NIS267b	NIS267b	NIS267b	NIS267b	NIS267b	NIS267b	NIS267b	NIS267b	NIS267b	NIS267b	NIS267b	NIS267b	NIS277	NIS277	NIS277	NIS277	NIS277	NIS277	NIS324	NIS310b
Zone	core	rim	core	core	rim	rim	core	core	core	core	core		core	core	core	core	core	core	core	outer core	rim	core	core	rim	core	core	rim chiaro	rim chiaro	core	rim	core	core	rim	core	core	rim	core	core	core	core	core	core	rim	core	rim	core	rim	core	core
Size	mph	mph	m	mph	mph	mph	mph	mph	mph	mph	mph		mph	ph	ph	m	ph	m	m	m	m	mph	mph	mph	m	mph	mph	mph	ph	ph	ph	mph	mph	mph	mph	mph	gdm	gdm	m	m	m	mph	mph	mph	mph	mph	mph	m	mph
wt.%
SiO2	38.912	36.731	38.3695	39.283	38.452	38.675	38.819	39.012	38.875	38.652	38.769		40.37	41.18	41.28	40.12	40.14	39.668	39.263	39.66	38.913	39.673	39.619	39.577	39.6499	39.9373	39.4854	39.1168	40.1524	39.4261	39.3777	39.481	39.652	39.471	39.627	39.669	39.309	39.523	39.699	39.491	39.811	39.924	38.69	39.794	39.298	39.513	38.866	40.82	39.587
TiO2	0.034	0.022	0	0.029	0.029	0.036	0.029	0.031	0.023	0.025	0.017		bdl	0.03	0.02	0.04	0.01	0.026	0.025	0.036	0.031	0.026	0.025	0.018	bdl	bdl	0.03	0.03	bdl	bdl	0.01	0.029	0.024	0.028	0.017	0.028	0.029	0.034	0.029	0.026	0.009	0.027	0.015	0.019	0.02	0.046	0.026	0.03	0.033
Al2O3	0.008	0.011	0.0845	0.014	0.005	0.012	0.016	0.015	0.021	0.011	0.013		0.02	bdl	bdl	0.06	bdl	0.012	0.025	0.02	0.025	0.011	0.011	0.018	bdl	bdl	bdl	bdl	bdl	bdl	bdl	0.015	0.024	0.02	0.018	0.011	0.027	0.013	0.02	0.007	bdl	0.008	0.015	0.028	0.009	0.008	0.015	0.03	0.004
Cr2O3	bdl	0.008	bdl	bdl	0.005	0.032	bdl	bdl	bdl	bdl	bdl		bdl	bdl	bdl	bdl	0.1	bdl	0.008	0.005	0.016	bdl	bdl	0.016	bdl	bdl	bdl	0.04	0.03	bdl	bdl	0.02	0.02	0.015	0.01	0.015	0	0.02	bdl	0.026	0.001	0.002	0.003	0.018	0.007	bdl	0.016	bdl	bdl
FeO	17.556	26.99	23.396	15.559	21.417	19.355	19.422	19.457	17.587	19.859	18.601		13.74	13.18	14.09	14.16	13.22	14.764	15.359	14.934	15.56	14.009	13.745	14.688	16.1046	13.8052	16.89	18.34	14.1147	13.9355	13.8372	14.259	14.168	14.194	14.262	14.44	14.643	14.733	14.23	14.2	14.195	14.13	20.482	14.362	15.693	16.32	18.349	15.42	14.292
MnO	0.251	0.506	0.3721	0.217	0.369	0.313	0.29	0.295	0.275	0.328	0.335		0.09	0.13	0.17	0.19	0.24	0.21	0.216	0.2	0.242	0.203	0.198	0.206	0.23	0.13	0.25	0.22	0.26	0.2	0.26	0.215	0.226	0.217	0.218	0.224	0.229	0.213	0.204	0.214	0.201	0.195	0.306	0.201	0.258	0.245	0.336	0.22	0.204
NiO	0.005	0.052	bdl	0.032	bdl	0.015	0.005	0.027	0.022	0.041	0.038		bdl	bdl	bdl	0.08	0.19	0.118	0.104	0.139	0.066	0.165	0.139	0.117	bdl	0.03	0.13	0.09	0	0	0	0.137	0.114	0.132	0.102	0.118	0.098	0.103	0.117	0.124		0.11	0.112	0.147	0.118	0.066	0.054		0.082
MgO	43.083	34.962	38.3213	44.382	39.502	41.598	41.085	40.941	42.218	41.154	41.586		47.1	46.25	46.23	47.07	46.86	45.722	44.717	45.394	45.002	46.553	46.558	45.594	44.33	45.69	43.75	43.05	46.89	46.97	46.83	45.689	45.78	45.634	45.893	45.679	44.692	44.7	45.997	46.177	45.855	46.197	40.532	46.267	44.901	44.611	42.593	44.25	44.805
CaO	0.108	0.1	0.1742	0.136	0.117	0.124	0.121	0.125	0.134	0.125	0.125		0.15	0.1	0.12	0.13	0.11	0.119	0.132	0.185	0.132	0.122	0.121	0.125	0.1	0.12	0.11	0.1	0.08	0.14	0.1	0.112	0.135	0.118	0.118	0.114	0.142	0.142	0.135	0.128	0.131	0.117	0.125	0.114	0.123	0.131	0.117	0.14	0.126
Sum	99.957	99.382	100.718	99.652	99.896	100.16	99.787	99.903	99.155	100.198	99.484		101.47	100.87	101.91	101.85	100.87	100.639	99.849	100.573	99.987	100.762	100.416	100.359	100.414	99.7125	100.645	100.987	101.527	100.672	100.415	99.957	100.143	99.829	100.265	100.298	99.169	99.481	100.431	100.393	100.221	100.71	100.28	100.95	100.427	100.94	100.372	100.91	99.133
Atomic proportions calcualted on the basis of 4 Oxygens
Si	0.990566	0.987437	0.981405	0.99347	0.997461	0.991204	0.998047	1.00154	0.997683	0.992551	0.996724		0.992391	1.01308	1.00951	0.985851	0.992331	0.989816	0.99066	0.991153	0.982431	0.985938	0.986736	0.990118	0.996506	0.999708	0.994618	0.989002	0.989265	0.980461	0.981482	0.990091	0.991734	0.990777	0.990307	0.991743	0.99513	0.997314	0.990248	0.986061	0.994171	0.992086	0.995442	0.988166	0.987657	0.989908	0.989514	1.01456	0.999983
Ti	0.000650865	0.000444745	0.00159139	0.000551519	0.000565701	0.000693821	0.000560682	0.000598472	0.000443877	0.000482762	0.000328663		0	0.000554999	0.000367802	0.000739133	0.000185905	0.000487865	0.000474344	0.000676554	0.000588547	0.000485892	0.00046822	0.000338633	0	0	0.000568268	0.000570383	0	0	0.000187432	0.000546886	0.000451391	0.000528528	0.000319477	0.000526403	0.000552075	0.000645169	0.000543969	0.000488192	0.00016901	0.000504535	0.000290216	0.000354795	0.000377988	0.000866612	0.00049778	0.00056071	0.000626854
Al	0.000240021	0.00034852	0.000623538	0.000417289	0.000152864	0.000362471	0.000484826	0.000453859	0.000635186	0.000332914	0.000393906		0.000579446	0	0	0.00173764	0	0.000352902	0.00074343	0.000589084	0.000743886	0.000322186	0.000322886	0.000530733	0	0	0	0	0	0	0	0.00044334	0.000707457	0.00059168	0.000530164	0.000324115	0.000805583	0.00038662	0.000587968	0.000205998	0	0.000234296	0.000454849	0.000819463	0.000266586	0.000236213	0.000450093	0.00087879	0.000119086
Cr	0	0.000170036	0.000209145	0	0.000102547	0.00064842	0	0	0	6.09082e-05	0		0	0	0	0	0.00195458	0	0.00015959	9.87943e-05	0.000319375	0	0	0.000316474	0	0	0	0.00079959	0.000584381	0	0	0.000396543	0.000395489	0.000297689	0.000197584	0.000296492	0	0.000399012	0	0.000513278	1.97438e-05	3.92933e-05	6.10256e-05	0.000353393	0.000139094	0	0.000322067	0	0
Mg	1.635	1.40115	1.3893	1.67328	1.52759	1.58934	1.57471	1.56689	1.61522	1.57545	1.59385		1.72606	1.69622	1.68541	1.72427	1.727	1.70079	1.68199	1.69121	1.69375	1.7247	1.72863	1.70044	1.66091	1.70501	1.64289	1.62262	1.72223	1.74132	1.74007	1.70808	1.70693	1.70764	1.70976	1.70245	1.68666	1.68151	1.71043	1.71887	1.70709	1.71135	1.55463	1.71275	1.6823	1.66613	1.61659	1.63957	1.68724
Ni	0.00010238	0.00112441	0.00170219	0.000650945	0	0.00030922	0.0001034	0.000557543	0.000454139	0.000846854	0.00078581		0	0	0	0.00158119	0.00377813	0.00236832	0.00211066	0.00279413	0.00134028	0.00329824	0.00278456	0.00235437	0	0.000604032	0.00263395	0.00183029	0	0	0	0.00276345	0.0022934	0.00266511	0.00205033	0.00237287	0.00199553	0.00209056	0.00234744	0.00249041	0	0.00219863	0.00231782	0.00293612	0.0023854	0.00132997	0.00110583	0	0.00166609
Fe	0.37375	0.606786	0.622522	0.32907	0.464614	0.414842	0.417596	0.417737	0.37746	0.426476	0.399929		0.282466	0.271163	0.288163	0.290985	0.273317	0.308088	0.324086	0.312119	0.328529	0.291151	0.286285	0.3073	0.338488	0.288998	0.3558	0.387783	0.290822	0.289818	0.288428	0.299042	0.296343	0.297961	0.298068	0.301906	0.310009	0.310906	0.296842	0.296517	0.296449	0.293639	0.440703	0.298252	0.329836	0.341925	0.39068	0.320513	0.301918
Mn	0.00541202	0.0115216	0.0129954	0.00464832	0.00810755	0.00679459	0.00631525	0.00641473	0.0059778	0.00713412	0.00729493		0.00187393	0.00270887	0.00352133	0.00395449	0.00502547	0.00443833	0.00461616	0.00423354	0.00517498	0.00427304	0.00417685	0.00436513	0.00489612	0.00275628	0.00533391	0.00471131	0.00542576	0.00421272	0.00548898	0.00456679	0.00478767	0.00461364	0.00461446	0.00474332	0.00491031	0.00455248	0.00431003	0.0045259	0.00425148	0.00410427	0.00666845	0.0042276	0.00549214	0.00519885	0.00724565	0.00463142	0.00436472
Ca	0.00294566	0.00288028	0.00623527	0.00368509	0.00325178	0.00340497	0.00333312	0.00343826	0.00368456	0.00343914	0.00344317		0.0039507	0.00263583	0.00314421	0.00342257	0.0029136	0.00318141	0.0035684	0.00495357	0.00357059	0.00324843	0.0032288	0.00335052	0.00269275	0.00321836	0.00296873	0.00270889	0.00211178	0.00373021	0.00267049	0.00300929	0.00361762	0.0031735	0.00315951	0.0030536	0.00385154	0.0038391	0.00360792	0.00342432	0.003505	0.00311501	0.00344577	0.00303302	0.00331207	0.00351629	0.00319151	0.00372814	0.00341012
Z	0.990566	0.987437	0.981405	0.99347	0.997461	0.991204	0.998047	1.00154	0.997683	0.992551	0.996724		0.992391	1.01308	1.00951	0.985851	0.992331	0.989816	0.99066	0.991153	0.982431	0.985938	0.986736	0.990118	0.996506	0.999708	0.994618	0.989002	0.989265	0.980461	0.981482	0.990091	0.991734	0.990777	0.990307	0.991743	0.99513	0.997314	0.990248	0.986061	0.994171	0.992086	0.995442	0.988166	0.987657	0.989908	0.989514	1.01456	0.999983
Y	2.01745	2.02398	2.03359	2.01175	2.00382	2.0157	2.00254	1.99549	2.00343	2.01374	2.0057		2.01493	1.97272	1.98024	2.02595	2.01399	2.01922	2.01728	2.016	2.03343	2.02699	2.02543	2.01866	2.00699	2.00058	2.00963	2.02045	2.02118	2.03908	2.03666	2.01831	2.01508	2.01694	2.01838	2.01515	2.00823	2.00369	2.01812	2.02654	2.01131	2.01468	2.00828	2.02237	2.02373	2.01833	2.01959	1.96932	1.99872
Fo	81.0566	69.2836	68.403	83.2194	76.2437	78.8996	78.6586	78.5614	80.6665	78.2832	79.5129		85.6881	85.9835	85.1115	85.2488	85.995	84.3438	83.5041	84.0346	83.3939	85.2389	85.4776	84.37	82.7564	85.2512	81.8583	80.4144	85.234	85.3973	85.4376	84.781	84.8511	84.8143	84.8263	84.6084	84.1046	84.0416	84.8768	84.9522	84.8751	85.0484	77.5203	84.8626	83.2434	82.6137	80.1202	83.2927	84.4916
Fa	18.5291	30.0042	30.6501	16.3661	23.1894	20.594	20.8594	20.9446	18.8509	21.1914	19.9514		14.0227	13.7456	14.5519	14.3864	13.6097	15.2784	16.0895	15.5089	16.1755	14.3894	14.1562	15.2472	16.8655	14.45	17.728	19.2179	14.3929	14.2132	14.1618	14.843	14.7311	14.7989	14.788	15.0041	15.4584	15.539	14.7303	14.6549	14.7392	14.5928	21.9753	14.7777	16.3209	16.9541	19.3625	16.2826	15.1191
La	0.146034	0.142424	0.306996	0.183276	0.1623	0.169033	0.166493	0.172389	0.184013	0.170889	0.171771		0.196128	0.133614	0.158779	0.169214	0.145081	0.157769	0.177156	0.246138	0.175802	0.160545	0.159658	0.166241	0.134169	0.160919	0.147919	0.134248	0.104513	0.182936	0.131121	0.149366	0.17983	0.15762	0.156752	0.151757	0.192055	0.191877	0.179036	0.169241	0.174266	0.154805	0.171821	0.150279	0.163888	0.174353	0.158175	0.189396	0.170768
Tp	0.268307	0.569718	0.639832	0.231181	0.404656	0.337305	0.315454	0.321624	0.298541	0.354491	0.363924		0.0930288	0.137316	0.177823	0.195512	0.25024	0.220101	0.229173	0.210361	0.254796	0.211184	0.206537	0.216582	0.243953	0.137816	0.265766	0.233485	0.268523	0.206599	0.269509	0.226673	0.237994	0.229148	0.228937	0.235733	0.244851	0.227532	0.213878	0.223686	0.211381	0.203968	0.332517	0.209467	0.271762	0.257781	0.359103	0.235284	0.218571
Footnotes:ph= phenocryst; mph=micro-phenocryst; m=microlite; gdm=crypto-crystals of the groundmass. Fo=forsterite; Fa=fayalite; La=laihunite; Tp=tephroite. bdl=below detection limit
[truncated: 11 more columns]

## Sheet: TableS2b-PCD Orthoyroxene
Supplementary Table S2b - Orthopyroxene composition of the Post Caldera Dome (PCD) lavas and enclaves
Unit	PCD	PCD	PCD	PCD	PCD	PCD	PCD	PCD	PCD	PCD	PCD	PCD	PCD	PCD	PCD	PCD	PCD	PCD	PCD	PCD	PCD	PCD	PCD	PCD	PCD	PCD	PCD	PCD	PCD	PCD	PCD	PCD	PCD	PCD	PCD	PCD	PCD	PCD	PCD	PCD	PCD	PCD	PCD	PCD	PCD	PCD	PCD	PCD	PCD
Lithology	dome lava	dome lava	dome lava	dome lava	dome lava	enclave	enclave	enclave	enclave	dome lava	dome lava	dome lava	dome lava	dome lava	enclave	enclave	enclave	enclave	enclave	enclave	enclave	enclave	enclave	lava dome	lava dome	lava dome	lava dome	lava dome	enclave	enclave	enclave	enclave	enclave	lava dome	lava dome	lava dome	lava dome	lava dome	lava dome	lava dome	lava dome	lava dome	lava dome	lava dome	enclave	enclave	enclave	enclave	enclave
Deposit	Profitis Elias	Profitis Elias	Profitis Elias	Profitis Elias	Profitis Elias	Profitis Elias	Profitis Elias	Profitis Elias	Profitis Elias	Trapesina	Trapesina	Trapesina	Trapesina	Trapesina	Trapesina	Trapesina	Trapesina	Trapesina	Trapesina	Trapesina	Trapesina	Trapesina	Trapesina	Sterna	Sterna	Sterna	Sterna	Sterna	Sterna	Sterna	Sterna	Sterna	Sterna	Nifios	Nifios	Nifios	Karaviotis	Karaviotis	Karaviotis	Karaviotis	Karaviotis	Karaviotis	Karaviotis	Karaviotis	Karaviotis	Karaviotis	Karaviotis	Karaviotis	Karaviotis
Type	Older PCD system	Older PCD system	Older PCD system	Older PCD system	Older PCD system	Older PCD system	Older PCD system	Older PCD system	Older PCD system	Older PCD system	Older PCD system	Older PCD system	Older PCD system	Older PCD system	Older PCD system	Older PCD system	Older PCD system	Older PCD system	Older PCD system	Older PCD system	Older PCD system	Older PCD system	Older PCD system	Older PCD system	Older PCD system	Older PCD system	Older PCD system	Older PCD system	Older PCD system	Older PCD system	Older PCD system	Older PCD system	Older PCD system	Younger PCD system	Younger PCD system	Younger PCD system	Younger PCD system	Younger PCD system	Younger PCD system	Younger PCD system	Younger PCD system	Younger PCD system	Younger PCD system	Younger PCD system	Younger PCD system	Younger PCD system	Younger PCD system	Younger PCD system	Younger PCD system
Sample	NIS287b	NIS287b	NIS287b	NIS292a	NIS292a	NIS287b	NIS287b	NIS287b	NIS293a	NIS286a	NIS286a	NIS286a	NIS286a	NIS286a	NIS278b	NIS278b	NIS278b	NIS278b	NIS278b	NIS278b	NIS278b	NIS278a	NIS278a	NIS299b	NIS299b	NIS299b	NIS299b	NIS299b	NIS299b	NIS299b	NIS299b	NIS299b	NIS299b	NIS288	NIS288	NIS288	NIS264b	NIS264b	NIS264b	NIS264b	NIS264b	NIS277c	NIS277c	NIS277c	NIS264b	NIS267b	NIS267b	NIS267b	NIS267b
Zone	core	core	core	core	core	core	rim	core	core	core	core	core	core	core	core	rim	core	intermediate	rim				rim	core	core	core	core	core	core	core	rim	core	core	core	rim	core		core	core	core	rim				rim	core	rim	core	rim
Size	ph	m	ph	ph	gdm	gdm	m	m	mph	ph	mph	ph	mph	ph	ph	ph	ph	ph	ph	gdm	gdm	gdm	gdm	ph	m	ph	m	m	m	ph	ph	ph	m	ph	ph	ph	gdm	mph	mph	ph	ph	gdm	gdm	gdm	ph	mph	mph	ph	ph
wt.%
SiO2	53.0722	53.5802	52.9228	52.551	54.0461	53.61	52.59	53.77	53.37	52.9104	52.3389	52.2517	51.784	52.729	53.36	53.68	52.76	52.6	52.95	54.71	54.02	52.566	52.715	53.3852	52.9888	53.732	53.6428	53.6825	53.1176	53.405	53.2861	53.6626	53.1662	53.0553	52.6102	52.6696	53.6	52.62	52.95	52.65	52.26	52.823	52.036	54.442	51.3862	53.8748	54.2655	52.6004	52.9491
TiO2	0.08	0.05	0.12	0.1657	0.2708	0.36	0.26	0.32	0.18	0.13	0.11	0.15	0.405	0.109	0.07	0.09	0.11	0.13	0.12	0.32	0.44	0.442	0.449	0.1	0.08	0.12	0.11	0.09	0.3	0.1	0.09	0.1	0.26	0.02	0.08	0.07	0.17	0.12	0.16	0.16	0.08	0.381	0.105	0.156	0.24	0.19	0.23	0.1	0.12
Al2O3	0.41	0.3	0.42	0.2744	1.7695	1.17	0.73	1.5	1.31	0.420884	0.352368	0.479612	1.853	0.273	0.27	0.25	0.37	0.28	0.27	2.31	2.2	2.464	2.506	0.338	0.26	0.36	0.34	0.26	1.07	0.45	0.39	0.37	0.76	0.31	0.29	0.43	1.37	0.36	0.37	0.4	0.32	1.643	2.892	1.163	1.47	0.41	2.28	0.313216	0.352368
Cr2O3	bdl	bdl	0.02	bdl	0.0392	0.05	bdl	bdl	0.08	bdl	bdl	0.07	bdl	bdl	bdl	0.06	0.03	0.02	bdl	0.02	bdl	bdl	0.03	bdl	bdl	0.06	0.06	bdl	0.05	0.04	bdl	bdl	0.06	0.02	bdl	bdl	bdl	bdl	bdl	bdl	bdl	bdl	0.005	bdl	bdl	0.01	bdl	0.02	0.05
FeO	24.35	23.31	24.42	24.0418	15.0566	16.45	22.83	17.06	21.15	23.9315	22.7166	23.2347	18.917	23.007	22.44	22.73	23.79	23.5	22.7	12.95	13.79	15.341	15.627	22.5951	21.9063	22.2373	22.6581	22.5743	19.9399	23.077	23.2911	23.198	21.1	24.81	24.54	24.82	16.34	23.88	22.73	23.0138	22.9318	16.59	16.135	13.493	20.7252	23.2169	15.1057	22.0645	21.3767
MnO	1.24	1.1	1.01	1.3595	0.3736	0.61	0.27	0.47	1.01	1.08	1.28	1.18	1.449	1.312	1.34	1.19	1.22	1.17	1.28	0.36	0.41	0.393	0.477	0.96	0.99	1.08	1.07	1.25	0.94	1.01	1.25	1.16	0.37	1.15	1.26	1.17	0.67	1.32	1.33	1.26	1.32	0.924	0.862	0.384	1.06	1.29	0.5	1.27	1.51
MgO	21.24	21.78	21.08	20.9736	27.4374	25.37	21.84	26.12	23.86	21.48	21.55	21.74	22.625	21.029	21.25	21.45	21.26	21.24	21.33	27.95	27.34	26.163	25.758	21.58	21.86	21.51	21.58	21.8	23.2	21.41	21.62	21.31	23.33	21.35	21.35	21.09	26.15	22.06	21.85	21.44	21.53	26.036	25.787	28.214	23.06	21.81	27.57	21.63	22.28
CaO	0.99	0.99	0.99	0.9792	1.616	2.82	1.76	1.42	0.59	1.10848	1.02173	1.04101	1.1	0.972	0.96	0.97	0.93	0.98	0.98	2	2.19	1.926	1.66	1.02	0.93	1.02	0.96	0.92	1.21	1.01	0.98	1.17	1.52	0.94	0.91	1.01	1.88	0.99	0.94	0.99	0.94	1.138	1.169	1.556	1	0.794136	1.43701	0.992817	0.906066
Na2O	bdl	0.1	bdl	0.2215	0.0724	0.05	0.08	0.07	0.02	bdl	0.03	bdl	0.035	0.058	bdl	0.04	0.05	bdl	bdl	bdl	bdl	0.035	bdl	bdl	bdl	bdl	0.13	bdl	0.02	bdl	0.12	0.04	0.06	bdl	bdl	bdl	bdl	bdl	bdl	bdl	bdl	0.049	0.04	0.018	0.09	bdl	0.04	0.05	0.08
K2O	bdl	0.02	0.02	0.0827	0.0893	0.02	0	0.04	0.02	0.05	bdl	bdl	0.018	bdl	bdl	bdl	0.02	0.01	bdl	0.04	0.02	bdl	bdl	bdl	bdl	0.02	0.01	bdl	bdl	bdl	bdl	bdl	bdl	bdl	bdl	bdl	bdl	bdl	bdl	0.03	bdl	0.011	bdl	0.043	0.02	0.01	bdl	bdl	bdl
Sum	101.382	101.23	101.003	100.649	100.771	100.51	100.36	100.77	101.59	101.111	99.3996	100.147	98.186	99.489	99.69	100.46	100.54	99.93	99.63	100.66	100.41	99.334	99.241	99.9782	99.0151	100.139	100.561	100.577	99.8475	100.502	101.027	101.011	100.626	101.655	101.04	101.26	100.18	101.35	100.33	99.9438	99.3818	99.595	99.031	99.469	99.0514	101.606	101.428	99.041	99.6242
SiO2	53.0722	53.5802	52.9228	52.551	54.0461	53.61	52.59	53.77	53.37	52.9104	52.3389	52.2517	51.784	52.729	53.36	53.68	52.76	52.6	52.95	54.71	54.02	52.566	52.715	53.3852	52.9888	53.732	53.6428	53.6825	53.1176	53.405	53.2861	53.6626	53.1662	53.0553	52.6102	52.6696	53.6	52.62	52.95	52.65	52.26	52.823	52.036	54.442	51.3862	53.8748	54.2655	52.6004	52.9491
TiO2	0.08	0.05	0.12	0.1657	0.2708	0.36	0.26	0.32	0.18	0.13	0.11	0.15	0.405	0.109	0.07	0.09	0.11	0.13	0.12	0.32	0.44	0.442	0.449	0.1	0.08	0.12	0.11	0.09	0.3	0.1	0.09	0.1	0.26	0.02	0.08	0.07	0.17	0.12	0.16	0.16	0.08	0.381	0.105	0.156	0.24	0.19	0.23	0.1	0.12
Al2O3	0.41	0.3	0.42	0.2744	1.7695	1.17	0.73	1.5	1.31	0.420884	0.352368	0.479612	1.853	0.273	0.27	0.25	0.37	0.28	0.27	2.31	2.2	2.464	2.506	0.338	0.26	0.36	0.34	0.26	1.07	0.45	0.39	0.37	0.76	0.31	0.29	0.43	1.37	0.36	0.37	0.4	0.32	1.643	2.892	1.163	1.47	0.41	2.28	0.313216	0.352368
Cr2O3	bdl	bdl	0.02	bdl	0.0392	0.05	bdl	bdl	0.08	bdl	bdl	0.07	bdl	bdl	bdl	0.06	0.03	0.02	bdl	0.02	bdl	bdl	0.03	bdl	bdl	0.06	0.06	bdl	0.05	0.04	bdl	bdl	0.06	0.02	bdl	bdl	bdl	bdl	bdl	bdl	bdl	bdl	0.005	bdl	bdl	0.01	bdl	0.02	0.05
Fe2O3	1.33714	1.03155	1.06548	2.61479	2.39363	1.96683	1.71424	1.97787	1.81808	1.67072	1.32539	2.11378	0.0633977	0.208008	0	0	1.35685	0.910932	0	0.127762	0.908836	1.94853	0.794505	0	0	0	0	0	0.117366	0	1.23437	0	1.6455	1.97618	2.28874	2.05704	1.99668	3.0903	0.857799	0.853778	1.43371	2.3896	2.60298	1.27202	3.33819	0	1.87785	0.472225	0.813299
FeO	23.1468	22.3818	23.4613	21.689	12.9028	14.6802	21.2875	15.2803	19.5141	22.4282	21.524	21.3327	18.86	22.8198	22.44	22.73	22.5691	22.6803	22.7	12.835	12.9722	13.5877	14.9121	22.5951	21.9063	22.2373	22.6581	22.5743	19.8343	23.077	22.1804	23.198	19.6193	23.0318	22.4805	22.969	14.5434	21.0993	21.9581	22.2456	21.6417	14.4398	13.7928	12.3484	17.7215	23.2169	13.416	21.6396	20.6448
MnO	1.24	1.1	1.01	1.3595	0.3736	0.61	0.27	0.47	1.01	1.08	1.28	1.18	1.449	1.312	1.34	1.19	1.22	1.17	1.28	0.36	0.41	0.393	0.477	0.96	0.99	1.08	1.07	1.25	0.94	1.01	1.25	1.16	0.37	1.15	1.26	1.17	0.67	1.32	1.33	1.26	1.32	0.924	0.862	0.384	1.06	1.29	0.5	1.27	1.51
MgO	21.24	21.78	21.08	20.9736	27.4374	25.37	21.84	26.12	23.86	21.48	21.55	21.74	22.625	21.029	21.25	21.45	21.26	21.24	21.33	27.95	27.34	26.163	25.758	21.58	21.86	21.51	21.58	21.8	23.2	21.41	21.62	21.31	23.33	21.35	21.35	21.09	26.15	22.06	21.85	21.44	21.53	26.036	25.787	28.214	23.06	21.81	27.57	21.63	22.28
CaO	0.99	0.99	0.99	0.9792	1.616	2.82	1.76	1.42	0.59	1.10848	1.02173	1.04101	1.1	0.972	0.96	0.97	0.93	0.98	0.98	2	2.19	1.926	1.66	1.02	0.93	1.02	0.96	0.92	1.21	1.01	0.98	1.17	1.52	0.94	0.91	1.01	1.88	0.99	0.94	0.99	0.94	1.138	1.169	1.556	1	0.794136	1.43701	0.992817	0.906066
Na2O	bdl	0.1	bdl	0.2215	0.0724	0.05	0.08	0.07	0.02	bdl	0.03	bdl	0.035	0.058	bdl	0.04	0.05	bdl	bdl	bdl	bdl	0.035	bdl	bdl	bdl	bdl	0.13	bdl	0.02	bdl	0.12	0.04	0.06	bdl	bdl	bdl	bdl	bdl	bdl	bdl	bdl	0.049	0.04	0.018	0.09	bdl	0.04	0.05	0.08
K2O	bdl	0.02	0.02	0.0827	0.0893	0.02	0	0.04	0.02	0.05	bdl	bdl	0.018	bdl	bdl	bdl	0.02	0.01	bdl	0.04	0.02	bdl	bdl	bdl	bdl	0.02	0.01	bdl	bdl	bdl	bdl	bdl	bdl	bdl	bdl	bdl	bdl	bdl	bdl	0.03	bdl	0.011	bdl	0.043	0.02	0.01	bdl	bdl	bdl
Sum	101.516	101.334	101.11	100.911	101.011	100.707	100.532	100.968	101.772	101.279	99.5324	100.359	98.1924	99.5098	99.69	100.46	100.676	100.021	99.63	100.673	100.501	99.5292	99.3016	99.9782	99.0151	100.139	100.561	100.577	99.8592	100.502	101.151	101.011	100.791	101.853	101.27	101.466	100.38	101.66	100.416	100.029	99.5254	99.8344	99.2918	99.5964	99.3858	101.606	101.616	99.0883	99.7057
Atomic proportions on the basis of 4 cations and Fe3+ from stoichiometry
Si	1.97012	1.98177	1.97265	1.96256	1.92741	1.93998	1.95563	1.93607	1.94211	1.965	1.97138	1.95443	1.94827	1.99	2.00715	2.00298	1.97153	1.97718	1.99295	1.94206	1.9301	1.90971	1.92249	1.99885	1.99772	2.00885	1.99614	1.99789	1.96665	1.99279	1.97606	1.99385	1.95485	1.96485	1.95932	1.95981	1.93899	1.94582	1.97534	1.97531	1.97028	1.92355	1.90045	1.95559	1.91779	1.9881	1.92261	1.98502	1.97958
Al	0.0179378	0.0130776	0.0184508	0.0120777	0.0725854	0.0498994	0.0319938	0.063655	0.0561832	0.0184222	0.0156423	0.0211431	0.0517299	0.00999664	-0.00715467	-0.00297781	0.0162952	0.0124045	0.00704764	0.0579443	0.0699047	0.0902863	0.0775052	0.00114538	0.00228098	-0.00885472	0.00385599	0.00211285	0.033347	0.00720612	0.0170455	0.00614591	0.0329344	0.0135307	0.012729	0.0188574	0.0584105	0.0156897	0.0162681	0.0176871	0.014219	0.0705144	0.09955	0.0444115	0.0646593	0.0119042	0.0773895	0.0139309	0.0155264
Ti	0.0022332	0.00139069	0.00336357	0.00465345	0	0.00979636	0.00727058	0.000270448	0.00170765	0.00363058	0.00311566	0.00421912	0	0	0	0	0.00309103	0.00367465	0	0	0	0	0	0	0	0	0	0	0	0	0.00250981	0	0.0071889	0.000556983	0.00224046	0.00195869	0.00259627	0.00333692	0.00448856	0.00451407	0.0022681	0.00593138	0	0	0.00673563	0	0	0.00104668	0.00337371
Fe3+	0.00970715	0.00375935	0.00553661	0.0207136	0	0.000329142	0.00510391	0	0	0.01295	0.00986671	0.0202117	0	0	0	0	0.00908467	0.00673852	0	0	0	0	0	0	0	0	0	0	0	0	0.00438633	0	0.00503067	0.0210639	0.0257066	0.0193704	0	0.0351517	0.0039064	0.00249063	0.0132283	0	0	0	0.0108136	0	0	0	0.00151684
Al	0	0	0	0	0.00178843	0	0	0	0	0	0	0	0.0304354	0.00214636	0.0191245	0.013972	0	0	0.00492952	0.0386977	0.0227369	0.0152162	0.0302086	0.0137701	0.00927171	0.0247174	0.0110554	0.00929151	0.0133439	0.0125842	0	0.0100566	0	0	0	0	0	0	0	0	0	0	0.024933	0.0048244	0	0.00592759	0.0178159	0	0
Ti	0	0	0	0	0.00726225	0	0	0.00839406	0.00321797	0	0	0	0.0114583	0.00309345	0.00198005	0.00252533	0	0	0.00339644	0.00854195	0.0118219	0.0120753	0.0123137	0.00281561	0.00226805	0.00337372	0.00307812	0.0025188	0.00835262	0.00280603	0	0.00279404	0	0	0	0	0.00202831	0	0	0	0	0.00450184	0.00288373	0.00421386	0	0.00527251	0.00612784	0.00179117	0
Cr	0	0	0.000589401	0	0.00110528	0.00143052	0	0	0.00230166	0	0	0.0020701	0	0	0	0.00177006	0.000886326	0.000594381	0	0.000561305	0	0.000114894	0.00086502	0	0	0.00177354	0.00176525	0	0.00146364	0.00118009	0	0	0.00174422	0.000585604	0	0	0	0	0	0	0	0	0.000144376	0	0	0.00029176	0	0.000596733	0.00147795
Fe3+	0.0276449	0.0249519	0.024349	0.0527697	0.064236	0.0532293	0.0428656	0.053591	0.0497852	0.0337412	0.0276998	0.0392846	0.00179489	0.0059074	0	0	0.0290695	0.0190281	0	0.00341277	0.0244355	0.05327	0.0218041	0	0	0	0	0	0.00326997	0	0.0300599	0	0.0404982	0.034009	0.0384356	0.0382279	0.0543539	0.0508414	0.0201745	0.0216136	0.0274473	0.0654813	0.0715376	0.0343835	0.0829376	0	0.0500657	0.0134102	0.0213642
Mg	1.17541	1.20093	1.17135	1.16768	1.45869	1.36862	1.21073	1.40206	1.29437	1.18923	1.21005	1.21224	1.26897	1.18313	1.19161	1.19317	1.18433	1.19022	1.19683	1.47907	1.45624	1.41697	1.40041	1.20454	1.2286	1.19885	1.19713	1.2095	1.28052	1.19099	1.19523	1.18036	1.2788	1.17871	1.18534	1.16988	1.41024	1.2161	1.21517	1.19915	1.21008	1.4134	1.40399	1.51084	1.28299	1.19983	1.45618	1.21687	1.24177
													0	0								0	0																			0	0	0
Fe2+	0.718577	0.69231	0.731332	0.677386	0.384813	0.444262	0.66201	0.460118	0.593855	0.69658	0.677992	0.6673	0.593404	0.720233	0.705902	0.709283	0.705291	0.712962	0.714518	0.381021	0.38761	0.412824	0.454806	0.707507	0.690679	0.695269	0.705115	0.702602	0.614132	0.720139	0.687879	0.720823	0.603278	0.71332	0.700163	0.71475	0.439979	0.652494	0.685057	0.69797	0.68235	0.439743	0.42127	0.370946	0.553109	0.716493	0.397509	0.682939	0.64548
Mn	0.0389882	0.034461	0.0318871	0.0430037	0.0112851	0.0186968	0.0085042	0.014334	0.0311303	0.0339728	0.0408358	0.0373841	0.0461751	0.0419396	0.0426929	0.0376094	0.038614	0.0372506	0.0408063	0.0108239	0.0124078	0.0120932	0.0147345	0.0304451	0.0316134	0.0341999	0.0337248	0.0394035	0.0294783	0.0319218	0.0392629	0.0365061	0.011523	0.0360731	0.0397459	0.0368746	0.0205292	0.041344	0.0420255	0.0400399	0.0421521	0.0284996	0.0266653	0.0116832	0.0335079	0.0403207	0.0150046	0.0405944	0.0478165
Ca	0.0393749	0.0392322	0.0395367	0.0391806	0.0617463	0.109335	0.0701221	0.0547809	0.0230031	0.0441072	0.0412327	0.0417189	0.0443409	0.0393033	0.0386897	0.0387788	0.037234	0.039468	0.0395199	0.0760648	0.0838353	0.0749684	0.0648631	0.0409185	0.0375658	0.0408577	0.0382745	0.0366847	0.0479991	0.0403795	0.0389377	0.0465764	0.0598796	0.0372981	0.0363108	0.0402657	0.0728665	0.0392235	0.0375718	0.0397952	0.0379705	0.0443999	0.0457431	0.0598841	0.0399865	0.0313982	0.0545489	0.0401425	0.0362939
Na	0	0.00717123	0	0.0160383	0.00500603	0.00350804	0.00576791	0.0048868	0.00141108	0	0.00219084	0	0.00255309	0.00424401	0	0.0028938	0.00362254	0	0	0	0	0.00246533	0	0	0	0	0.00937924	0	0.0014357	0	0.00862803	0.00288155	0.00427733	0	0	0	0	0	0	0	0	0.00345957	0.00283241	0.0012536	0.00651241	0	0.00274772	0.00365839	0.00579895
K	0	0.000943704	0.000951028	0.00394006	0.00406274	0.000923287	0	0.00183738	0.000928459	0.0023689	0	0	0.000863938	0	0	0	0.000953421	0.000479532	0	0.00181139	0.000911613	0	0	0	0	0.000953898	0.000474719	0	0	0	0	0	0	0	0	0	0	0	0	0.00143587	0	0.000511011	0	0.00197046	0.000952229	0.000470769	0	0	0
Z	2	2	2	2	2	2	2	2	2	2	2	2	2	2	2	2	2	2	2	2	2	2	2	2	2	2	2	2	2	2	2	2	2	2	2	2	2	2	2	2	2	2	2	2	2	2	2	2	2
X Y	2	2	2	2	2	2	2	2	2	2	2	2	2	2	2	2	2	2	2	2	2	2	2	2	2	2	2	2	2	2	2	2	2	2	2	2	2	2	2	2	2	2	2	2	2	2	2	2	2
En	58.4869	60.1776	58.4509	58.3626	73.6426	68.6206	60.5566	70.6368	64.9737	59.1486	60.2711	60.0672	64.9195	59.4385	60.216	60.2964	59.1094	59.3428	60.0917	75.8344	74.1267	71.9229	71.573	60.7308	61.7866	60.8809	60.6374	60.8342	64.8234	60.047	59.8886	59.486	63.9717	58.3384	58.5151	57.933	70.5837	59.7546	60.6401	59.9257	60.1065	70.9708	71.2973	76.0081	64.0425	60.3523	73.7939	61.0279	62.2678
Fe	39.5539	37.8565	39.5762	39.679	23.2401	25.8975	35.9361	26.6033	33.8716	38.6577	37.6751	37.8656	32.8121	38.587	37.8289	37.744	39.0323	38.6894	37.9241	20.2656	21.6058	24.2719	25.112	37.2061	36.3242	37.0443	37.4239	37.3207	32.7467	37.9172	38.1603	38.1667	33.0329	39.8156	39.6924	40.073	25.7693	38.3181	37.485	38.0856	38.0075	26.7997	26.3798	20.9793	33.9615	38.0684	23.4418	36.9589	35.9123
Wo	1.95924	1.96589	1.97289	1.95831	3.11728	5.4819	3.50727	2.75991	1.15469	2.19375	2.05375	2.0672	2.26844	1.97453	1.95511	1.95967	1.85834	1.96783	1.98425	3.89998	4.26745	3.80525	3.31507	2.06303	1.88919	2.07486	1.93869	1.84513	2.42984	2.03584	1.95102	2.34728	2.99547	1.846	1.7925	1.99397	3.64702	1.9273	1.87493	1.98871	1.88605	2.22944	2.32292	3.01268	1.99598	1.57936	2.76433	2.01321	1.81993
Mg#	0.596557	0.613843	0.596273	0.595284	0.760121	0.726005	0.627577	0.726417	0.657327	0.604753	0.615349	0.613352	0.664263	0.606358	0.614168	0.615016	0.602286	0.60534	0.613082	0.78912	0.774311	0.74768	0.74027	0.620101	0.629764	0.621708	0.618362	0.619778	0.664378	0.612948	0.610803	0.609159	0.659471	0.594356	0.595831	0.591117	0.732554	0.609289	0.617988	0.611416	0.612619	0.725892	0.729928	0.783691	0.653468	0.613208	0.758918	0.622818	0.63422
Footnotes:ph= phenocryst; mph=micro-phenocryst; m=microlite; gdm=crypto-crystals of the groundmass. En=enstatite; Fe=ferrosillyte; Wo=wollastonite. bdl=below detection limit. Mg#=Mg/(Fe2++Fe3++Mn+Mg)
[truncated: 26 more columns]

## Sheet: TableS2c-PCD Clinopyroxene
Supplememtary Table S2c - Cinopyroxene composition of the Post Caldera Dome (PCD) lavas and encalves
Unit	PCD	PCD	PCD	PCD	PCD	PCD	PCD	PCD	PCD	PCD	PCD	PCD	PCD	PCD	PCD	PCD	PCD	PCD	PCD	PCD	PCD	PCD	PCD	PCD	PCD	PCD	PCD	PCD	PCD	PCD	PCD	PCD	PCD	PCD	PCD	PCD	PCD	PCD	PCD	PCD	PCD	PCD	PCD	PCD	PCD	PCD	PCD	PCD	PCD
Lithology	dome lava	dome lava	dome lava	dome lava	dome lava	Enclave	Enclave	Enclave	Enclave	Enclave	Enclave	dome lava	dome lava	dome lava	dome lava	dome lava	dome lava	dome lava	dome lava	dome lava	dome lava	dome lava	dome lava	dome lava	dome lava	Enclave	Enclave	Enclave	Enclave	Enclave	Enclave	Enclave	Enclave	Enclave	Enclave	Enclave	Enclave	Enclave	Enclave	Enclave	Enclave	Enclave	Enclave	Enclave	Enclave	Enclave	Enclave	Enclave	Enclave
Deposit	Profitis Elias	Profitis Elias	Profitis Elias	Profitis Elias	Profitis Elias	Profitis Elias	Profitis Elias	Profitis Elias	Profitis Elias	Profitis Elias	Profitis Elias	Trapesina	Trapesina	Trapesina	Trapesina	Trapesina	Trapesina	Trapesina	Trapesina	Trapesina	Trapesina	Trapesina	Trapesina	Trapesina	Trapesina	Trapesina	Trapesina	Trapesina	Trapesina	Trapesina	Trapesina	Trapesina	Trapesina	Trapesina	Trapesina	Trapesina	Trapesina	Trapesina	Trapesina	Trapesina	Trapesina	Trapesina	Trapesina	Trapesina	Trapesina	Trapesina	Trapesina	Trapesina	Trapesina
Type	Older PCD system	Older PCD system	Older PCD system	Older PCD system	Older PCD system	Older PCD system	Older PCD system	Older PCD system	Older PCD system	Older PCD system	Older PCD system	Older PCD system	Older PCD system	Older PCD system	Older PCD system	Older PCD system	Older PCD system	Older PCD system	Older PCD system	Older PCD system	Older PCD system	Older PCD system	Older PCD system	Older PCD system	Older PCD system	Older PCD system	Older PCD system	Older PCD system	Older PCD system	Older PCD system	Older PCD system	Older PCD system	Older PCD system	Older PCD system	Older PCD system	Older PCD system	Older PCD system	Older PCD system	Older PCD system	Older PCD system	Older PCD system	Older PCD system	Older PCD system	Older PCD system	Older PCD system	Older PCD system	Older PCD system	Older PCD system	Older PCD system
Sample	NIS287b	NIS287b	NIS287b	NIS292a	NIS292a	NIS287b	NIS287b	NIS287b	NIS287b	NIS297	NIS297	NIS286a	NIS286a	NIS286a	NIS286a	NIS286a	NIS286a	NIS286a	NIS286a	NIS286a	NIS286a	NIS286a	NIS286a	NIS286a	NIS286a	NIS278b	NIS278b	NIS278b	NIS278b	NIS278b	NIS278b	NIS278b	NIS278b	NIS278b	NIS278b	NIS278b	NIS278b	NIS278a	NIS278a	NIS278a	NIS278a	NIS278a	NIS278a	NIS278a	NIS278a	NIS278a	NIS278a	NIS278a	NIS278a
Zone	core			core	core	core	core	core	core	core	core	core	rim	core			core	rim					core	rim	rim	core	rim	core	core		core	core	core	core	core	core	core	core	core	core		core	rim	core	rim	core	inner rim	rim	core
Size	m	gdm	mph	m	m	m	m	m	m	m	m	ph	ph	ph	gdm	m	mph	mph	m	m	m	m	mph	mph	mph	m	m	m	m	gdm	m	m	m	m	mph	m	m	m	m	m	m	mph	mph	mph	mph	ph	ph	ph	mph
SiO2	51.8868	52.3251	53.132	52.7584	50.6605	49.6257	53.0025	51.1298	48.5898	49.15	48.14	51.4477	51.4961	50.9439	52.1742	51.221	48.937	50.187	49.661	49.342	49.998	48.64	49.112	52.469	50.145	48.99	47.87	53.66	47.21	46.41	50.83	52.28	51	51.72	52.49	51.93	48.72	51.96	50.98	53.32	49.179	52.959	49.59	52.585	49.553	52.623	49.846	49.285	52.777
TiO2	0.42	0.54	0.4	0.1833	0.6733	0.8	0.34	0.63	1.32	1.11	0.5	0.13	0.11	0.14	0.27	0.54	1.049	0.597	0.707	0.952	0.712	1.061	0.965	0.372	0.686	1.26	1.66	0.2	1.43	2.98	0.77	0.33	0.62	0.58	0.61	0.65	1.24	0.43	0.7	0.33	0.892	0.223	0.893	0.339	0.894	0.345	0.799	0.942	0.34
Al2O3	2.02	3.5	2.19	0.6182	2.9018	5.52	2.09	3.73	7.09	6.73	4.42	0.714524	0.7341	0.822192	2.43721	2.687	5.674	3.867	5.117	5.943	5.363	6.33	5.721	2.439	4.03	6.67	7.7	1.41	7.33	8.66	4.07	2.13	5.18	2.72	2.7	3.36	6.52	3.19	5.72	2.36	4.916	1.206	4.492	1.77	3.965	2.273	5.316	4.553	2.129
Cr2O3	bdl	0.07	0.02	bdl	0.0141	0.05	0.1	bdl	bdl	bdl	bdl	bdl	bdl	bdl	0.09	bdl	0.136	0.01	0.027	0.041	0.04	0.088	bdl	bdl	0.008	bdl	bdl	0.06	0.06	bdl	0.06	0.01	0.15	0.07	bdl	0.08	0.02	bdl	0.07	bdl	0.006	0.065	0.005	0.008	0.02	0.014	0.175	0.005	0.021
FeO	8.63	12.18	7.1	10.758	9.2533	7.56	5.7	8.07	6.85	6.78	6.13	9.41538	9.46898	9.84417	6.26203	8.977	5.556	8.097	6.482	6.404	6.277	6.349	7.575	6.499	8.419	7	6.85	6.81	6.61	10.08	6.49	7.42	5.5	6.79	6.44	7	6.91	7.04	6.2	5.82	7.599	8.978	7.374	7.062	8.216	5.492	5.381	8.4	6.6
MnO	0.32	0.25	0.12	0.5199	0.2951	0.15	0.22	0.25	0.1	0.12	0.14	0.67	0.67	0.55	0.27	0.33	0.092	0.224	0.145	0.141	0.149	0.124	0.156	0.192	0.248	0.17	0.13	0.33	0.23	0.3	0.12	0.36	0.17	0.16	0.23	0.21	0.09	0.21	0.16	0.21	0.176	0.52	0.167	0.255	0.211	0.15	0.115	0.189	0.207
MgO	15.16	21.89	18.27	13.9697	15.6275	15.69	18.1	15.76	14.69	15.14	16.83	14.37	14.51	14.24	18.87	15.839	14.942	14.953	15.328	15.672	15.621	15.294	14.503	17.846	16.358	14.62	13.82	18.1	14.85	16.26	16.59	15.59	15.84	16.26	15.84	16.59	14.64	18.61	15.57	18.73	15.517	14.391	15.417	19.07	15.04	18.291	15.862	14.849	19.015
CaO	21.33	9.83	19.27	21.0296	19.0047	21.01	21.01	21.11	21.34	21.63	21.88	21.254	21.3215	20.9745	18.2948	19.223	22.271	20.437	20.985	20.627	21.141	21.223	21.342	19.131	19.163	21.76	22.55	18.75	21.34	11.53	20.68	22.47	22.25	22.07	21.7	21.57	21.24	18.59	21.79	19.29	20.299	20.772	21.017	18.153	20.129	20.146	21.785	20.662	18.119
Na2O	0.29	0.2	0.29	0.4323	0.3	0.37	0.13	0.27	0.31	0	0.34	0.38	0.32	0.39	0.14	0.313	0.266	0.289	0.313	0.277	0.301	0.289	0.295	0.183	0.245	0.23	0.33	0.23	0.28	2.23	0.25	0.26	0.38	0.34	0.28	0.25	0.35	0.33	0.38	0.17	0.273	0.429	0.25	0.173	0.398	0.197	0.278	0.302	0.185
K2O	0.03	0.05	0.05	0.0552	0.1681	0	0	0	0.05	0	0	0.04	0.02	0.01	0.09	0.054	0.011	0.029	0.011	0.002	0.008	0.011	0.009	0.016	0.014	0	0	0.09	0	0.68	0.02	0	0	0.06	0	0	0	0	0	0.02	0.005	0.04	0.009	0.002	0.03	0	0.006	0	0.001
Sum	100.087	100.835	100.842	100.325	98.8984	100.776	100.692	100.95	100.34	100.66	98.38	98.4216	98.6506	97.9148	98.8982	99.184	98.934	98.69	98.776	99.401	99.61	99.409	99.678	99.151	99.316	100.7	100.91	99.64	99.34	99.13	99.88	100.85	101.09	100.77	100.29	101.64	99.73	100.36	101.57	100.25	98.862	99.583	99.214	99.417	98.456	99.531	99.563	99.187	99.394
SiO2	51.8868	52.3251	53.132	52.7584	50.6605	49.6257	53.0025	51.1298	48.5898	49.15	48.14	51.4477	51.4961	50.9439	52.1742	51.221	48.937	50.187	49.661	49.342	49.998	48.64	49.112	52.469	50.145	48.99	47.87	53.66	47.21	46.41	50.83	52.28	51	51.72	52.49	51.93	48.72	51.96	50.98	53.32	49.179	52.959	49.59	52.585	49.553	52.623	49.846	49.285	52.777
TiO2	0.42	0.54	0.4	0.1833	0.6733	0.8	0.34	0.63	1.32	1.11	0.5	0.13	0.11	0.14	0.27	0.54	1.049	0.597	0.707	0.952	0.712	1.061	0.965	0.372	0.686	1.26	1.66	0.2	1.43	2.98	0.77	0.33	0.62	0.58	0.61	0.65	1.24	0.43	0.7	0.33	0.892	0.223	0.893	0.339	0.894	0.345	0.799	0.942	0.34
Al2O3	2.02	3.5	2.19	0.6182	2.9018	5.52	2.09	3.73	7.09	6.73	4.42	0.714524	0.7341	0.822192	2.43721	2.687	5.674	3.867	5.117	5.943	5.363	6.33	5.721	2.439	4.03	6.67	7.7	1.41	7.33	8.66	4.07	2.13	5.18	2.72	2.7	3.36	6.52	3.19	5.72	2.36	4.916	1.206	4.492	1.77	3.965	2.273	5.316	4.553	2.129
Cr2O3	bdl	0.07	0.02	bdl	0.0141	0.05	0.1	bdl	bdl	bdl	bdl	bdl	bdl	bdl	0.09	bdl	0.136	0.01	0.027	0.041	0.04	0.088	bdl	bdl	0.008	bdl	bdl	0.06	0.06	bdl	0.06	0.01	0.15	0.07	bdl	0.08	0.02	bdl	0.07	bdl	0.006	0.065	0.005	0.008	0.02	0.014	0.175	0.005	0.021
Fe2O3	2.57806	2.30515	2.31387	2.27927	2.75445	4.72753	2.2492	3.34371	3.08835	2.03583	6.81249	3.54269	3.5543	3.83782	2.11701	2.28497	2.91646	2.26962	2.56075	2.60439	2.61515	3.54017	3.03393	0.931461	3.31325	2.73947	3.67162	0.475412	4.68443	9.31363	2.69679	3.06452	2.92848	4.00709	0.772222	3.22238	2.8458	3.61791	2.45195	1.03243	3.46389	0.394268	3.37575	2.44024	3.23185	1.93203	2.96523	3.50384	1.51771
FeO	6.31022	10.1058	5.01794	8.70707	6.77479	3.30608	3.67613	5.06127	4.07105	4.94812	0	6.22761	6.27076	6.39082	4.35711	6.92094	2.93172	6.05476	4.17779	4.06052	3.92384	3.16349	4.84501	5.66085	5.43768	4.53498	3.54621	6.38222	2.39487	1.69943	4.06338	4.66249	2.8649	3.18434	5.74514	4.10044	4.3493	3.78454	3.99369	4.891	4.48213	8.62323	4.33644	4.86623	5.30792	3.75353	2.71283	5.24718	5.23434
MnO	0.32	0.25	0.12	0.5199	0.2951	0.15	0.22	0.25	0.1	0.12	0.14	0.67	0.67	0.55	0.27	0.33	0.092	0.224	0.145	0.141	0.149	0.124	0.156	0.192	0.248	0.17	0.13	0.33	0.23	0.3	0.12	0.36	0.17	0.16	0.23	0.21	0.09	0.21	0.16	0.21	0.176	0.52	0.167	0.255	0.211	0.15	0.115	0.189	0.207
																0	0	0	0	0	0	0	0	0	0																0	0	0	0	0	0	0	0	0
MgO	15.16	21.89	18.27	13.9697	15.6275	15.69	18.1	15.76	14.69	15.14	16.83	14.37	14.51	14.24	18.87	15.839	14.942	14.953	15.328	15.672	15.621	15.294	14.503	17.846	16.358	14.62	13.82	18.1	14.85	16.26	16.59	15.59	15.84	16.26	15.84	16.59	14.64	18.61	15.57	18.73	15.517	14.391	15.417	19.07	15.04	18.291	15.862	14.849	19.015
CaO	21.33	9.83	19.27	21.0296	19.0047	21.01	21.01	21.11	21.34	21.63	21.88	21.254	21.3215	20.9745	18.2948	19.223	22.271	20.437	20.985	20.627	21.141	21.223	21.342	19.131	19.163	21.76	22.55	18.75	21.34	11.53	20.68	22.47	22.25	22.07	21.7	21.57	21.24	18.59	21.79	19.29	20.299	20.772	21.017	18.153	20.129	20.146	21.785	20.662	18.119
Na2O	0.29	0.2	0.29	0.4323	0.3	0.37	0.13	0.27	0.31	0	0.34	0.38	0.32	0.39	0.14	0.313	0.266	0.289	0.313	0.277	0.301	0.289	0.295	0.183	0.245	0.23	0.33	0.23	0.28	2.23	0.25	0.26	0.38	0.34	0.28	0.25	0.35	0.33	0.38	0.17	0.273	0.429	0.25	0.173	0.398	0.197	0.278	0.302	0.185
K2O	0.03	0.05	0.05	0.0552	0.1681	0	0	0	0.05	0	0	0.04	0.02	0.01	0.09	0.054	0.011	0.029	0.011	0.002	0.008	0.011	0.009	0.016	0.014	0	0	0.09	0	0.68	0.02	0	0	0.06	0	0	0	0	0	0.02	0.005	0.04	0.009	0.002	0.03	0	0.006	0	0.001
Sum	100.345	101.066	101.074	100.553	99.1743	101.249	100.918	101.285	100.649	100.864	99.0625	98.7765	99.0067	98.2992	99.1103	99.4129	99.2262	98.9174	99.0325	99.6619	99.872	99.7637	99.9819	99.2443	99.6479	100.974	101.278	99.6876	99.8093	100.063	100.15	101.157	101.383	101.171	100.367	101.963	100.015	100.722	101.816	100.353	99.209	99.6225	99.5522	99.6615	98.7798	99.7246	99.8601	99.538	99.546
Atomic proportions on the basis of 4 cations and Fe3+ from stoichiometry
Si	1.9195	1.88685	1.92198	1.96626	1.89312	1.8072	1.91866	1.86612	1.78017	1.79653	1.7803	1.94489	1.9423	1.93728	1.91632	1.90652	1.81397	1.87706	1.84367	1.81784	1.83827	1.79326	1.81698	1.93077	1.85588	1.79202	1.74972	1.96688	1.74465	1.69804	1.86222	1.91193	1.8441	1.88324	1.92416	1.87471	1.79666	1.88245	1.83848	1.93294	1.82874	1.97719	1.83896	1.92495	1.85659	1.92183	1.82951	1.83543	1.93016
Al IV	0.0804966	0.11315	0.0780203	0.0271542	0.106882	0.192801	0.0813426	0.133879	0.219831	0.203471	0.192649	0.031835	0.032633	0.0368495	0.0836784	0.0934763	0.18603	0.122937	0.156326	0.182158	0.161725	0.206744	0.183016	0.0692342	0.14412	0.207984	0.250282	0.033118	0.255347	0.301956	0.137779	0.0880732	0.1559	0.116728	0.0758413	0.125288	0.203341	0.117546	0.161524	0.0670577	0.171259	0.022812	0.161039	0.0750538	0.143413	0.0781684	0.170488	0.164567	0.0698393
Ti	0	0	0	0.00513716	0	0	0	0	0	0	0.0139049	0.00369559	0.00311995	0.0040035	0	0	0	0	0	0	0	0	0	0	0	0	0	0	0	0	0	0	0	2.79122e-05	0	0	0	0	0	0	0	0	0	0	0	0	0	0	0
Fe3+	0	0	0	0.0014532	0	0	0	0	0	0	0.0131505	0.0195818	0.0219421	0.0218671	0	0	0	0	0	0	0	0	0	0	0	0	0	0	0	0	0	0	0	0	0	0	0	0	0	0	0	0	0	0	0	0	0	0	0
Al VI	0.0075762	0.0355995	0.0153473	0	0.0209187	0.0441171	0.00782491	0.0265688	0.0863106	0.0864535	0	0	0	0	0.0218247	0.0243984	0.0618502	0.0475223	0.0675687	0.0758917	0.0706688	0.0683064	0.0664406	0.0365444	0.031667	0.0795704	0.0814248	0.0277944	0.0639079	0.0714779	0.0379586	0.00373348	0.0648516	0	0.0408093	0.017672	0.0800366	0.0186628	0.0815918	0.0337747	0.044189	0.0302538	0.0352864	0.00131024	0.0316713	0.0196675	0.05947	0.0352719	0.0219271
Ti	0.011684	0.0146431	0.0108809	0	0.0189203	0.0219079	0.00925534	0.0172909	0.0363666	0.0305102	0	0	0	0	0.00745742	0.0151147	0.0292402	0.0167909	0.0197379	0.0263747	0.0196857	0.0294155	0.0268474	0.0102939	0.0190923	0.0346591	0.0456273	0.00551277	0.0397396	0.0819909	0.0212136	0.00907531	0.0168585	0.0158535	0.0168154	0.0176458	0.0343868	0.0117148	0.0189831	0.00899611	0.024943	0.00626073	0.0249024	0.00933187	0.0251881	0.00947482	0.0220528	0.0263807	0.00935061
Cr	0	0.00199572	0.000572001	0	0.000416583	0.0014396	0.00286204	0	0	0	0	0	0	0	0.00261354	0	0.00398571	0.000295707	0.000792513	0.00119425	0.00116276	0.00256511	0	0.000116375	0.000234092	0	0	0.00173881	0.00175307	0	0.00173795	0.000289141	0.00428824	0.00201521	0	0.00228339	0.000583126	0	0.00199586	0	0.0001764	0.00191865	0.000146596	0.000231537	0.000592447	0.000404242	0.00507828	0.00014722	0.000607214
Fe3+	0.0717687	0.0625514	0.0629858	0.0624694	0.0774559	0.129552	0.061269	0.0918343	0.085144	0.0559969	0.176434	0.0811979	0.0789386	0.0879565	0.0585122	0.0640009	0.0813505	0.063878	0.0715396	0.0722031	0.0723545	0.0982165	0.0844657	0.0257931	0.0922758	0.075407	0.100989	0.0131132	0.130269	0.256429	0.0743481	0.0843354	0.0796833	0.109797	0.0213019	0.0875395	0.0789722	0.0986334	0.0665398	0.0281645	0.0969275	0.0110767	0.094202	0.0672203	0.0911187	0.0530962	0.0818983	0.0981926	0.0417684
Mg	0.836068	1.17675	0.98524	0.776151	0.870579	0.851791	0.976766	0.857497	0.802323	0.824987	0.927856	0.809835	0.815871	0.807273	1.03323	0.878886	0.825681	0.833732	0.84833	0.860745	0.856204	0.840583	0.799893	0.97899	0.902533	0.797246	0.753049	0.989047	0.818111	0.886887	0.906083	0.849948	0.853847	0.882631	0.865626	0.892839	0.804841	1.00511	0.837062	1.01223	0.860183	0.800958	0.852293	1.04068	0.840048	0.995836	0.867908	0.824388	1.03671
																0	0	0	0	0	0	0	0	0	0																0	0	0	0	0	0	0	0	0
Fe2+	0.195224	0.304757	0.151801	0.271379	0.211719	0.100686	0.111288	0.154483	0.124732	0.151254	0	0.196882	0.197797	0.203242	0.133834	0.215435	0.0908806	0.189383	0.12971	0.125106	0.120649	0.0975374	0.149905	0.174207	0.168303	0.138729	0.108399	0.195639	0.0740138	0.0519991	0.124496	0.142597	0.0866325	0.096967	0.176125	0.123795	0.134132	0.114663	0.120445	0.14828	0.139384	0.269237	0.134483	0.148972	0.166313	0.11464	0.083269	0.16342	0.160091
Mn	0.0100269	0.00763578	0.00367672	0.0164117	0.00934035	0.00462676	0.00674543	0.00772844	0.00310315	0.00371516	0.00438531	0.0214531	0.0214044	0.0177153	0.00839968	0.0104039	0.00288846	0.00709613	0.00455956	0.00439992	0.00464013	0.00387219	0.00488848	0.00598431	0.00777428	0.00526707	0.0040247	0.0102454	0.00719928	0.00929704	0.00372373	0.0111513	0.00520654	0.00493462	0.00714131	0.00642128	0.00281117	0.00644407	0.00488725	0.00644813	0.00554333	0.0164436	0.00524543	0.00790648	0.00669597	0.00463999	0.0035751	0.00596172	0.00641217
Ca	0.845437	0.379786	0.74685	0.839727	0.7609	0.819755	0.814865	0.825491	0.837663	0.847083	0.866946	0.860851	0.861626	0.854573	0.719945	0.766609	0.884486	0.818961	0.834711	0.814205	0.832802	0.838328	0.845974	0.754263	0.759879	0.852809	0.8831	0.736355	0.844944	0.451986	0.811746	0.880435	0.861991	0.861011	0.852281	0.834305	0.839212	0.721595	0.841926	0.749238	0.808734	0.830893	0.835041	0.711973	0.808027	0.788292	0.856685	0.824432	0.709973
Na	0.0208005	0.013983	0.0203393	0.0312376	0.0217357	0.0261243	0.00912408	0.0191062	0.0220203	0	0.0243786	0.027852	0.0234012	0.0287547	0.00996977	0.0225883	0.019117	0.020957	0.0225298	0.0197862	0.021457	0.0206581	0.0211607	0.0130564	0.0175806	0.016312	0.0233864	0.0163456	0.0200621	0.158193	0.0177581	0.0184354	0.0266405	0.0240033	0.0199006	0.0174985	0.0250248	0.02318	0.0265697	0.0119487	0.0196825	0.0310534	0.0179747	0.0122786	0.0289116	0.0139492	0.0197831	0.0218059	0.0131179
K	0.00141582	0.00230014	0.00230738	0.00262448	0.00801368	0	0	0	0.00233692	0	0	0.00192906	0.000962342	0.000485128	0.00421708	0.00256416	0.000520166	0.0013837	0.000520976	9.39995e-05	0.000375236	0.000517366	0.000424778	0.000751109	0.000661008	0	0	0.00420849	0	0.0317397	0.000934754	0	0	0.00278712	0	0	0	0	0	0.000924943	0.000237191	0.00190513	0.000425772	9.33992e-05	0.00143391	0	0.000280939	0	4.66557e-05
Z	2	2	2	2	2	2	2	2	2	2	2	2	2	2	2	2	2	2	2	2	2	2	2	2	2	2	2	2	2	2	2	2	2	2	2	2	2	2	2	2	2	2	2	2	2	2	2	2	2
X Y	2	2	2	2	2	2	2	2	2	2	2	2	2	2	2	2	2	2	2	2	2	2	2	2	2	2	2	2	2	2	2	2	2	2	2	2	2	2	2	2	2	2	2	2	2	2	2	2	2
En	42.6887	60.9247	50.5108	39.4468	45.1079	44.6803	49.5585	44.2685	43.2994	43.8115	46.6547	40.6993	40.843	40.513	52.8797	45.4126	43.796	43.5813	44.9125	45.8658	45.3822	44.7467	42.4318	50.4832	46.7448	42.6458	40.715	50.8664	43.6433	53.5366	47.1821	43.1782	45.2403	45.1395	45.0266	45.9067	43.2718	51.6382	44.7421	52.0597	45.0176	41.5304	44.3611	52.646	43.9309	50.8987	45.8402	43.0177	53.0298
Fe	14.1443	19.4123	11.2001	17.8753	15.4672	12.3197	9.09733	13.1152	11.494	11.2035	9.75324	16.0375	16.0235	16.6002	10.274	14.9762	9.28874	13.6095	10.896	10.7483	10.4759	10.6267	12.6919	10.6219	13.8988	11.7362	11.5385	11.263	11.2818	19.1794	10.5482	12.0949	9.08794	10.8267	10.6409	11.1962	11.6086	11.2894	10.2558	9.40633	12.6574	15.3871	12.1759	11.3367	13.8127	8.81041	8.91245	13.9624	10.6535
Wo	43.167	19.663	38.2891	42.6779	39.425	42.9999	41.3441	42.6162	45.2066	44.9849	43.592	43.2632	43.1335	42.8868	36.8462	39.6112	46.9152	42.8092	44.1915	43.3859	44.1418	44.6267	44.8763	38.8948	39.3564	45.618	47.7464	37.8706	45.0748	27.284	42.2697	44.7269	45.6718	44.0338	44.3325	42.8971	45.1197	37.0725	45.0021	38.534	42.325	43.0825	43.4631	36.0173	42.2564	40.2908	45.2474	43.0199	36.3167
Mg#	0.751125	0.758364	0.818507	0.68816	0.744661	0.783864	0.844903	0.771447	0.79023	0.796356	0.827095	0.717335	0.718226	0.709345	0.837317	0.752004	0.825021	0.762033	0.804761	0.810148	0.812455	0.80809	0.769756	0.82617	0.770812	0.78419	0.779182	0.818717	0.794596	0.736243	0.817285	0.78118	0.832722	0.80655	0.808849	0.803929	0.788475	0.820597	0.813523	0.846967	0.780538	0.729659	0.784639	0.822816	0.760792	0.852445	0.837223	0.75496	0.832711
Footnotes:ph= phenocryst; mph=micro-phenocryst; m=microlite; gdm=crypto-crystals of the groundmass. En=enstatite; Fe=ferrosillyte; Wo=wollastonite. bdl=below detection limit. Mg#=Mg/(Fe2++Fe3++Mn+Mg)
[truncated: 66 more columns]

## Sheet: TableS2d-PCD Amphiboles
Supplementary Table S2d - Amphibole composition of the Post Caldera Dome (PCD) lavas and enclaves
Unit	PCD	PCD	PCD	PCD	PCD	PCD	PCD	PCD	PCD	PCD	PCD	PCD	PCD	PCD	PCD	PCD	PCD	PCD	PCD	PCD	PCD	PCD	PCD	PCD	PCD	PCD	PCD	PCD	PCD	PCD	PCD	PCD	PCD	PCD	PCD	PCD	PCD	PCD	PCD	PCD	PCD	PCD	PCD	PCD	PCD	PCD	PCD	PCD	PCD
Lithology	Enclave	Enclave	Enclave	Enclave	Enclave	Enclave	Enclave	Enclave	Enclave	Enclave	Enclave	Enclave	Enclave	Enclave	Enclave	Enclave	Enclave	Enclave	Enclave	Enclave	Enclave	Enclave	Enclave	Enclave	Enclave	Enclave	Enclave	Enclave	Enclave	Enclave	Enclave	Enclave	Enclave	Enclave	Enclave	Enclave	Enclave	Enclave	Enclave	Enclave	Enclave	Enclave	Enclave	Enclave	Enclave	Enclave	Enclave	Enclave	Enclave
Deposit	Profitis Elias	Profitis Elias	Profitis Elias	Profitis Elias	Profitis Elias	Profitis Elias	Profitis Elias	Profitis Elias	Profitis Elias	Profitis Elias	Profitis Elias	Profitis Elias	Profitis Elias	Profitis Elias	Trapesina	Trapesina	Trapesina	Trapesina	Trapesina	Trapesina	Trapesina	Trapesina	Trapesina	Trapesina	Trapesina	Nifios	Karaviotis	Karaviotis	Karaviotis	Karaviotis	Karaviotis	Karaviotis	Karaviotis	Karaviotis	Boriatico	Boriatico	Boriatico	Boriatico	Boriatico	Boriatico	Boriatico	Boriatico	Boriatico	Boriatico	Boriatico	Boriatico	Boriatico	Boriatico	Boriatico
Type	Older PCD system	Older PCD system	Older PCD system	Older PCD system	Older PCD system	Older PCD system	Older PCD system	Older PCD system	Older PCD system	Older PCD system	Older PCD system	Older PCD system	Older PCD system	Older PCD system	Older PCD system	Older PCD system	Older PCD system	Older PCD system	Older PCD system	Older PCD system	Older PCD system	Older PCD system	Older PCD system	Older PCD system	Older PCD system	Younger PCD system	Younger PCD system	Younger PCD system	Younger PCD system	Younger PCD system	Younger PCD system	Younger PCD system	Younger PCD system	Younger PCD system	Younger PCD system	Younger PCD system	Younger PCD system	Younger PCD system	Younger PCD system	Younger PCD system	Younger PCD system	Younger PCD system	Younger PCD system	Younger PCD system	Younger PCD system	Younger PCD system	Younger PCD system	Younger PCD system	Younger PCD system
Sample	NIS297	NIS287b	NIS293b	NIS293b	NIS293b	NIS293b	NIS293b	NIS293b	NIS293b	NIS293b	NIS293b	NIS293b	NIS293b	NIS293b	NIS278b	NIS278b	NIS278b	NIS283	NIS283	NIS283	NIS283	NIS283	NIS283	NIS283	NIS283	NIS288	NIS264b	NIS264b	NIS264b	NIS264b	NIS267b	NIS267b	NIS267b	NIS266c	NIS310b	NIS310b	NIS310b	NIS310b	NIS310b	NIS310b	NIS310b	NIS310b	NIS310b	NIS310b	NIS324	NIS324	NIS324	NIS324	NIS324
Zone	core	core	core	core	core	core	core	core	core	core	core	core	core	core	core	rim	core	rim	rim	core	rim	core	rim	core	rim		core	rim	core	rim	rim	core	rim	core	core	core	core	core	core	core	core	core	core	core	core	core	core	core	core
Size	mph	mph	mph	mph	mph	mph	mph	mph	mph	mph	mph	mph	mph	mph	mph	mph	mph	mph	mph	ph	ph	m	m	m	m	m	m	m	m	m	m	m	m	m	m	m	m	m	m	m	m	m	m	m	m	m	m	m	m
Notes
SiO2	41.55	42.25	42.8163	41.1149	42.8933	42.8735	42.4528	42.6122	42.3563	42.8451	41.4274	41.5098	41.3554	43.8458	42.53	44.5	43.95	46	46.07	44.36	43.02	43.45	41.601	42.295	41.326	41.17	42.8881	43.0239	41.4621	43.1403	42.506	39.651	40.2882	42.57	42.4561	42.2926	41.2444	42.666	41.4052	41.2568	40.277	41.819	41.83	42.11	42.7178	42.3477	41.4466	42.4376	42.8855
TiO2	1.43	2.47	2.0164	2.5599	2.2922	2.4651	2.2226	2.3689	2.087	2.513	2.3289	1.9869	2.1477	2.2162	2.37	2.07	2.03	2.07	2.09	1.9	1.83	2.16	1.912	1.974	1.631	2.58	1.89	2.15	2.43	2.37	2.25	2.025	2.29	2.18	2.0784	1.9519	2.4978	2.1895	2.4725	2.0793	2.29	2.275	1.852	2.315	2.5504	2.6201	2.5723	1.8531	2.4729
Al2O3	14.92	13.04	12.5511	11.8023	13.2824	12.5011	12.9494	12.5363	12.6057	12.1798	13.5127	13.0715	12.8638	11.7045	12.19	11.72	12.74	8.4	7.76	12.21	13.16	9.71	12.478	12.795	11.786	13.52	12.41	11	13.24	9.84	13.25	12.919	13.067	12.98	12.5489	12.1062	11.7739	10.8598	12.255	13.2274	12.463	11.153	11.706	11.466	12.5511	11.9384	12.3792	11.7365	12.2808
Cr2O3	0.05	0.06	bdl	bdl	0.0113	0.017	bdl	0.0253	bdl	0.1041	bdl	0.0253	0.0084	bdl	0.05	0.06	bdl	bdl	bdl	0	0.04	0.05	0.01	0.041	0.013	bdl	bdl	bdl	bdl	0.04	bdl	bdl	0.07	bdl	0.0476	bdl	bdl	0.0083	0.0444	bdl	0.057	bdl	bdl	bdl	0.0593	bdl	bdl	0.0313	bdl
FeO	11.32	9.99	10.8177	14.9945	7.9346	8.6016	8.4114	9.0199	8.6161	9.5671	10.0827	8.6035	9.7067	8.5618	11.07	8.02	7.62	14.08	13.69	7.56	9.13	14.89	11.933	8.137	14.344	12.19	9.09065	13.6405	11.0054	14.3426	9.72804	12.91	12.3901	11.08	10.1906	12.1516	13.721	12.8252	12.6818	11.551	12.082	11.615	12.999	12.995	11.5006	10.7542	12.2225	12.2335	9.9268
MnO	0.05	0.08	0.1044	0.216	0.1478	0.055	0.0907	0.1043	0.0769	0.1216	0.1334	0.087	0.1348	0.0874	0.15	0.1	0.13	0.36	0.28	0.06	0.02	0.22	0.129	0.117	0.337	0.12	0.17	0.26	0.16	0.45	0.12	0.119	0.13	0.02	0.1537	0.168	0.2562	0.1286	0.1071	0.1673	0.188	0.137	0.201	0.173	0.0931	0.0988	0.1642	0.2141	0.0796
MgO	14.84	15.6	15.3697	12.6153	16.5738	16.5896	16.3975	16.3912	16.0837	16.2398	15.3665	16.5052	15.6606	16.4711	15.16	17.03	17.06	14.08	14.27	16.86	16.18	13.03	14.217	16.406	12.373	14.08	16.2	13.27	14.75	12.75	15.32	13.7	15.01	15.6	15.5193	14.5762	13.5764	14.5818	14.0844	14.9761	14.087	14.899	14.343	13.397	15.4255	15.5857	14.128	14.785	15.8923
CaO	11.71	11.57	11.1178	10.8643	11.6201	11.4753	11.4643	11.3153	11.9429	11.3796	11.4485	11.647	11.0861	11.6236	11.22	11.97	12.72	11.08	11.25	11.92	11.82	11.6	11.086	11.548	10.97	11.44	11.45	11.68	11.36	11.77	11.8175	10.912	11.4415	11.17	11.1939	10.7301	10.8799	10.8099	10.88	10.9072	10.857	10.641	10.647	10.977	11.1721	10.8628	11.5256	11.2394	11.3005
Na2O	2.15	2.2	1.9274	2.672	2.0388	2.7064	2.5722	2.2258	2.5832	2.4885	2.7458	2.4952	2.3486	2.6552	2.48	2.24	2.21	2.16	1.8	2.33	2.09	2.1	2.23	2.226	2.433	2.37	2.49	2.17	2.51	0.189	1.93	2.307	2.27	2.18	2.2569	2.4411	2.4422	2.1029	2.4695	2.1419	2.338	2.348	2.263	2.092	2.458	2.3142	2.9023	2.6612	2.4188
K2O	0.33	0.34	0.5341	0.5378	0.6219	1.0067	0.3857	0.5877	0.6041	0.5893	0.6792	0.3987	0.6531	0.5196	0.34	0.34	0.39	0.58	0.74	0.45	0.37	0.87	0.388	0.343	0.442	0.37	0.26	0.7	0.35	0.79	0.55	0.357	0.52	0.38	0.618	0.4236	0.4997	0.3512	0.5377	0.9194	0.371	0.291	0.406	0.435	0.5811	0.5827	0.525	0.9143	0.4567
Cl	0.02	0.02	0.067	0.1436	0.034	0.0486	bdl	bdl	bdl	0.0077	bdl	bdl	0.0238	0.0462	0.03	bdl	bdl	0.17	0.23	0.01	bdl	0.08	0.022	0.015	0.097	0.03	bdl	0.14	0.02	0.12	0.06	0.055	0.05	0.04	bdl	bdl	0.097	0.0412	bdl	bdl	0.026	0.039	0.035	0.059	bdl	0.0322	0.0243	bdl	0.1456
F	0.19	0.49													0.11	bdl	0.25	0.2	0.06	0.41	0.13	0.32	bdl	bdl	bdl	0.15	0.36	0.61	0.51	0.04	bdl		0.23	0.09
Sum	98.56	98.11	97.3219	97.5206	97.4502	98.3399	96.9466	97.1869	96.9567	98.0356	97.7251	96.3301	95.989	97.7314	97.7	98.05	99.1	99.18	98.24	98.07	97.79	98.48	96.177	96.112	95.958	98.02	97.2088	98.6445	97.7975	95.842	97.5315	95.259	97.7568	98.29	97.0634	96.8413	96.9885	96.5644	96.9376	97.2264	95.036	95.217	96.282	96.019	99.109	97.1368	97.89	98.106	97.8595
SiO2	41.55	42.25	42.8163	41.1149	42.8933	42.8735	42.4528	42.6122	42.3563	42.8451	41.4274	41.5098	41.3554	43.8458	42.53	44.5	43.95	46	46.07	44.36	43.02	43.45	41.601	42.295	41.326	41.17	42.8881	43.0239	41.4621	43.1403	42.506	39.651	40.2882	42.57	42.4561	42.2926	41.2444	42.666	41.4052	41.2568	40.277	41.819	41.83	42.11	42.7178	42.3477	41.4466	42.4376	42.8855
TiO2	1.43	2.47	2.0164	2.5599	2.2922	2.4651	2.2226	2.3689	2.087	2.513	2.3289	1.9869	2.1477	2.2162	2.37	2.07	2.03	2.07	2.09	1.9	1.83	2.16	1.912	1.974	1.631	2.58	1.89	2.15	2.43	2.37	2.25	2.025	2.29	2.18	2.0784	1.9519	2.4978	2.1895	2.4725	2.0793	2.29	2.275	1.852	2.315	2.5504	2.6201	2.5723	1.8531	2.4729
Al2O3	14.92	13.04	12.5511	11.8023	13.2824	12.5011	12.9494	12.5363	12.6057	12.1798	13.5127	13.0715	12.8638	11.7045	12.19	11.72	12.74	8.4	7.76	12.21	13.16	9.71	12.478	12.795	11.786	13.52	12.41	11	13.24	9.84	13.25	12.919	13.067	12.98	12.5489	12.1062	11.7739	10.8598	12.255	13.2274	12.463	11.153	11.706	11.466	12.5511	11.9384	12.3792	11.7365	12.2808
Cr2O3	0.05	0.06	0	0	0.0113	0.017	0	0.0253	0	0.1041	0	0.0253	0.0084	0	0.05	0.06	0	0	0	0	0.04	0.05	0.01	0.041	0.013	0	0	0	0	0.04	0	0	0.07	0	0.0476	0	0	0.0083	0.0444	0	0.057	0	0	0	0.0593	0	0.0029	0.0313	0
Fe2O3	11.6925	9.55081	11.3829	9.28105	8.78108	7.12553	8.44488	9.9646	5.88509	9.14064	8.38911	9.55563	10.3299	6.12492	9.60463	7.02488	5.52331	7.42496	6.77906	5.91863	9.1778	6.20505	9.9623	8.6746	8.25363	9.6127	9.03875	6.0751	9.25359	9.58638	8.04139	12.439	13.1377	12.2862	9.86159	11.2988	10.64	11.7811	10.3622	12.4376	10.9158	11.2039	12.6419	8.53312	10.9472	11.0623	6.8866	8.96839	9.27344
FeO	0.798522	1.39573	0.574799	6.64297	0.0329711	2.18971	0.8123	0.0532818	3.32042	1.34192	2.53379	0.00489438	0.411408	3.05031	2.4273	1.69868	2.64987	7.39867	7.58988	2.23414	0.87138	9.30641	2.96846	0.331187	6.917	3.54004	0.957157	8.17387	2.67861	5.71634	2.49201	1.71681	0.568163	0.0243192	1.31668	1.98442	4.1466	2.22399	3.3574	0.359044	2.25947	1.5332	1.62323	5.3165	1.6498	0.799828	6.02562	4.16332	1.58213
MnO	0.05	0.08	0.1044	0.216	0.1478	0.055	0.0907	0.1043	0.0769	0.1216	0.1334	0.087	0.1348	0.0874	0.15	0.1	0.13	0.36	0.28	0.06	0.02	0.22	0.129	0.117	0.337	0.12	0.17	0.26	0.16	0.45	0.12	0.119	0.13	0.02	0.1537	0.168	0.2562	0.1286	0.1071	0.1673	0.188	0.137	0.201	0.173	0.0931	0.0988	0.1642	0.2141	0.0796
MgO	14.84	15.6	15.3697	12.6153	16.5738	16.5896	16.3975	16.3912	16.0837	16.2398	15.3665	16.5052	15.6606	16.4711	15.16	17.03	17.06	14.08	14.27	16.86	16.18	13.03	14.217	16.406	12.373	14.08	16.2	13.27	14.75	12.75	15.32	13.7	15.01	15.6	15.5193	14.5762	13.5764	14.5818	14.0844	14.9761	14.087	14.899	14.343	13.397	15.4255	15.5857	14.128	14.785	15.8923
CaO	11.71	11.57	11.1178	10.8643	11.6201	11.4753	11.4643	11.3153	11.9429	11.3796	11.4485	11.647	11.0861	11.6236	11.22	11.97	12.72	11.08	11.25	11.92	11.82	11.6	11.086	11.548	10.97	11.44	11.45	11.68	11.36	11.77	11.8175	10.912	11.4415	11.17	11.1939	10.7301	10.8799	10.8099	10.88	10.9072	10.857	10.641	10.647	10.977	11.1721	10.8628	11.5256	11.2394	11.3005
Na2O	2.15	2.2	1.9274	2.672	2.0388	2.7064	2.5722	2.2258	2.5832	2.4885	2.7458	2.4952	2.3486	2.6552	2.48	2.24	2.21	2.16	1.8	2.33	2.09	2.1	2.23	2.226	2.433	2.37	2.49	2.17	2.51	0.189	1.93	2.307	2.27	2.18	2.2569	2.4411	2.4422	2.1029	2.4695	2.1419	2.338	2.348	2.263	2.092	2.458	2.3142	2.9023	2.6612	2.4188
K2O	0.33	0.34	0.5341	0.5378	0.6219	1.0067	0.3857	0.5877	0.6041	0.5893	0.6792	0.3987	0.6531	0.5196	0.34	0.34	0.39	0.58	0.74	0.45	0.37	0.87	0.388	0.343	0.442	0.37	0.26	0.7	0.35	0.79	0.55	0	0.52	0.38	0.618	0.4236	0.4997	0.3512	0.5377	0.9194	0.371	0.291	0.406	0.435	0.5811	0.5827	0.525	0.9143	0.4567
BaO	0.19	0.49													0.11	0	0.25	0.2	0.06	0.41	0.13	0.32	0.147	0.195	0.15	0.15	0.36	0.61	0.51	0.04	0	0.21	0.23	0.09							0.206	0.157	0.163	0.196	0.0031	0.0322	0.0243	0	0.1456
Cl	0.02	0.02	0.067	0.1436	0.034	0.0486	bdl	bdl	bdl	0.0077	bdl	bdl	0.0238	0.0462	0.03	bdl	bdl	0.17	0.23	0.01	0	0.08	0.022	0.015	0.097	0.03	0	0.14	0.02	0.12	0.06	0.357	0.05	0.04	0	0	0.097	0.0412	0	0	0.026	0.039	0.035	0.059	2.12507	2.08384	2.05574	2.07912	2.06839
H2O*	2.02408	1.86617	2.08589	2.0043	2.10756	2.09685	2.09759	2.10483	2.07636	2.10817	2.08872	2.08287	2.06327	2.0894	2.03231	2.12422	2.01283	1.94998	1.98313	1.91782	2.05368	1.872	2.04804	2.07789	1.98617	2.00474	1.92436	1.72834	1.83408	1.97876	2.08114	1.9065	1.96135	2.07022	2.0905	2.07731	2.02654	2.05826	2.06286	2.08826	2.02305	2.03631	2.05411	2.02282
	101.755	100.933	100.548	100.454	100.437	101.15	99.89	100.29	99.6225	101.059	100.654	99.37	99.0868	100.434	100.694	100.878	101.666	101.874	100.902	100.581	100.763	100.973	99.1988	99.0387	98.7148	100.987	100.038	100.981	100.558	98.7808	100.418	98.3173	101.034	101.591	100.142	100.05	100.081	99.8026	100.038	100.56	98.3583	98.5324	99.7652	99.0924	102.334	100.329	100.638	101.083	100.857
O=F,Cl	0.0845075	0.210822	0.0151018	0.0323674	0.0076636	0.0109544	0	0	0.00018032	0.00173558	0	0	0.00536452	0.0104135	0.0530775	0	0.105262	0.122528	0.077105	0.174884	0.0547365	0.152768	0.0049588	0.003381	0.0218638	0.0699195	0.151578	0.288396	0.219244	0.04389	0.013524	0.103626	0.108111	0.0469105	0	0	0.0218638	0.00928648	0	0	0.0058604	0.0087906	0.007889	0.0132986	0.00069874	0.00725788	0.00547722	0	0.0328182
Sum	101.671	100.722	100.533	100.422	100.43	101.139	99.89	100.29	99.6223	101.058	100.654	99.37	99.0815	100.424	100.641	100.878	101.561	101.751	100.825	100.406	100.708	100.821	99.1938	99.0353	98.6929	100.918	99.8868	100.693	100.339	98.7369	100.405	98.2137	100.926	101.544	100.142	100.05	100.059	99.7933	100.038	100.56	98.3524	98.5236	99.7573	99.0791	102.333	100.321	100.633	101.083	100.824
No. of oxygens	23	23	23	23	23	23	23	23	23	23	23	23	23	23	23	23	23	23	23	23	23	23	23	23	23	23	23	23	23	23	23	23	23	23	23	23	23	23	23	23	23	23	23	23	23	23	23	23	23
Si	5.87876	6.02233	6.10499	6.04087	6.07758	6.09492	6.06852	6.07037	6.11605	6.08821	5.94709	5.97566	5.99243	6.25707	6.09555	6.28143	6.18296	6.60577	6.67331	6.28965	6.09806	6.37373	6.07407	6.09211	6.16238	5.92498	6.13816	6.28329	5.97421	6.37773	6.07962	5.87616	5.79913	6.01227	6.08958	6.10465	6.02916	6.18409	6.01843	5.92391	5.95022	6.12799	6.07976	6.19609	6.02521	6.06963	6.02719	6.12024	6.10769
Al iv	2.12124	1.97767	1.89501	1.95913	1.92242	1.90508	1.93148	1.92963	1.88395	1.91179	2.05291	2.02434	2.00757	1.74293	1.90445	1.71857	1.81704	1.39423	1.32478	1.71035	1.90194	1.62627	1.92593	1.90789	1.83762	2.07502	1.86184	1.71671	2.02579	1.62227	1.92038	2.12384	2.20087	1.98773	1.91042	1.89535	1.97084	1.81591	1.98157	2.07609	2.04978	1.87201	1.92024	1.80391	1.97479	1.93037	1.97281	1.87976	1.89231
Al vi	0.366717	0.212992	0.214192	0.0846227	0.295659	0.189454	0.250174	0.175173	0.26131	0.128011	0.233323	0.193454	0.189276	0.225665	0.154668	0.231211	0.295322	0.027459	0	0.330034	0.29662	0.0524654	0.221315	0.264205	0.233724	0.218192	0.231465	0.176638	0.222629	0.0922268	0.313202	0.132628	0.0158978	0.172853	0.210931	0.164158	0.0576488	0.0392239	0.117867	0.162361	0.120215	0.0541683	0.085	0.184501	0.111643	0.0863158	0.148871	0.11512	0.169046
Ti	0.152188	0.264828	0.216263	0.282913	0.2443	0.263599	0.238983	0.253839	0.226676	0.268603	0.251477	0.21515	0.234085	0.237893	0.255503	0.219785	0.214814	0.223597	0.227719	0.202637	0.19512	0.238334	0.209988	0.213873	0.18294	0.27929	0.203466	0.236181	0.263369	0.263548	0.242068	0.225733	0.247942	0.231591	0.224236	0.211925	0.27465	0.238709	0.27033	0.224574	0.254472	0.250758	0.202474	0.25622	0.270583	0.282475	0.28137	0.201023	0.264912
Cr	0.00559319	0.00676183	0	0	0.00126589	0.00191075	0	0.00284956	0	0.0116954	0	0.00287959	0.000962333	0	0.00566582	0.00669615	0	0	0	0	0.00448288	0.00579895	0.00115439	0.00466915	0.00153265	0	0	0	0	0.00467539	0	0	0.00796633	0	0.00539796	0	0	0.000951146	0.00510255	0	0.00665773	0	0	0	0.00661292	0	0.000333426	0.00356893	0
Fe3+	1.24494	1.02448	1.22139	1.02618	0.936297	0.762291	0.908436	1.06823	0.639486	0.977439	0.90627	1.03519	1.12639	0.657762	1.03591	0.746211	0.584739	0.802388	0.738954	0.631511	0.979005	0.684973	1.09461	0.94027	0.926179	1.04106	0.973495	0.667659	1.00338	1.0665	0.86553	1.38723	1.42308	1.3058	1.06443	1.2273	1.17047	1.28501	1.13346	1.34392	1.21354	1.23549	1.38272	0.944855	1.16196	1.19317	0.753626	0.973323	0.993875
Fe2+	0.0944838	0.166378	0.0685406	0.816242	0.00390689	0.260329	0.0971066	0.00634769	0.400961	0.159467	0.304189	0.000589236	0.0498539	0.364034	0.290936	0.200524	0.311758	0.888537	0.919421	0.264912	0.103296	1.14167	0.362462	0.039894	0.862579	0.42606	0.114562	0.9983	0.322771	0.706734	0.29808	0.212774	0.0683933	0.00287237	0.157937	0.239545	0.506921	0.269577	0.40812	0.0431138	0.279151	0.187888	0.197303	0.654206	0.194604	0.0958705	0.732797	0.502127	0.188436
Mn	0.00599198	0.00965858	0.0126085	0.0268807	0.0177379	0.00662258	0.0109817	0.0125849	0.00940513	0.0146355	0.0162203	0.0106082	0.0165442	0.0105643	0.0182094	0.0119559	0.0154906	0.0437879	0.0343532	0.00720563	0.00240125	0.0273346	0.0159533	0.0142741	0.0425638	0.0146276	0.020608	0.0321615	0.019527	0.0563483	0.0145376	0.0149373	0.0158494	0.00239249	0.0186727	0.0205396	0.0317217	0.0157878	0.0131857	0.0203467	0.0235244	0.017004	0.0247446	0.0215608	0.0111224	0.0119943	0.0202248	0.0261529	0.00960208
Mg	3.13009	3.3149	3.26701	2.76316	3.50083	3.51579	3.49432	3.48097	3.46216	3.44015	3.28852	3.54213	3.38289	3.50408	3.23911	3.58362	3.57788	3.01423	3.08145	3.5637	3.41907	2.84942	3.09452	3.52281	2.75048	3.02077	3.4564	2.88906	3.16833	2.80997	3.26658	3.0267	3.22088	3.28449	3.31839	3.13653	2.95859	3.15075	3.05194	3.20568	3.10244	3.25469	3.10776	2.93866	3.24348	3.33018	3.06278	3.17869	3.37413
Ca	1.77513	1.76697	1.69845	1.71025	1.76404	1.74784	1.75583	1.72705	1.84765	1.7325	1.76085	1.79642	1.7211	1.77722	1.72293	1.8103	1.91727	1.70476	1.74596	1.81079	1.79513	1.82314	1.73424	1.78214	1.75263	1.76397	1.75576	1.82759	1.75374	1.8643	1.81096	1.73261	1.76451	1.69023	1.72023	1.65942	1.70402	1.6787	1.6944	1.67797	1.71848	1.67065	1.65799	1.73051	1.68832	1.66814	1.79576	1.73667	1.72434
Na	0.589808	0.60802	0.53285	0.761193	0.56011	0.745983	0.712917	0.614788	0.723217	0.68562	0.764265	0.696463	0.659838	0.73468	0.689171	0.613061	0.60282	0.601419	0.505538	0.640544	0.574415	0.597284	0.631304	0.621672	0.703437	0.661321	0.690968	0.614461	0.70123	0.0541753	0.535231	0.662895	0.633531	0.596966	0.627649	0.683187	0.692199	0.590976	0.695978	0.596307	0.669697	0.667114	0.637735	0.596832	0.672206	0.643118	0.818326	0.744137	0.667919
K	0.0595644	0.0618266	0.0971532	0.100804	0.112414	0.182573	0.0703371	0.106806	0.111281	0.106828	0.124387	0.0732217	0.120728	0.0945956	0.0621663	0.061226	0.069994	0.106256	0.136746	0.0813966	0.0669086	0.16281	0.0722714	0.0630277	0.0840826	0.0679308	0.0474715	0.130417	0.0643363	0.148994	0.100357	0	0.0954875	0.0684664	0.113082	0.0780029	0.0931879	0.0649392	0.0997073	0.168413	0.0699211	0.0543996	0.0752806	0.0816546	0.104562	0.106546	0.0973967	0.168215	0.0829767
BaO	0.08502	0.220896													0.0498613	0	0.111232	0.090834	0.027487	0.183854	0.0582798	0.148459	0.00841064	0.0110065	0.008765	0.0682733	0.162951	0.281747	0.232409	0.0187023	0	0.0121954	0.104705	0.0402004							0.0119256	0.00901529	0.00928371	0.0113012
Cl	0.0047957	0.00483143	0.0161904	0.0357572	0.00816447	0.0117091	0	0	0.000195772	0.00185433	0	0	0.00584461	0.0111736	0.00728697	0	0	0.0413735	0.0564624	0.00240294	0	0.0198885	0.00544386	0.00366166	0.0245135	0.00731704	0	0.0346508	0.00488391	0.0300657	0.0145441	0.0896635	0.0121973	0.00957421	0	0	0.024031	0.0101204	0	0	0.00650964	0.00968539	0.00862133	0.0147127	0.000741025	0.00782161	0.00598881	0	0.0351428
OH*	1.91018	1.77427	1.98381	1.96424	1.99184	1.98829	2	2	1.9998	1.99815	2	2	1.99416	1.98883	1.94285	2	1.88877	1.86779	1.91605	1.81374	1.94172	1.83165	1.99456	1.99634	1.97549	1.92441	1.83705	1.6836	1.76271	1.95123	1.98546	1.88456	1.8831	1.95023	2	2	1.97597	1.98988	2	2	1.99349	1.99031	1.99138	1.98529	1.99926	1.99218	1.99401	2	1.96486
Total	17.4245	17.4368	17.3285	17.5722	17.4366	17.6764	17.5391	17.4486	17.6822	17.5249	17.6495	17.5661	17.5017	17.6065	17.4743	17.4846	17.5901	17.4124	17.3882	17.5327	17.4365	17.5832	17.4462	17.4779	17.5489	17.4932	17.4942	17.5725	17.5193	17.0675	17.4466	17.4077	17.4935	17.3557	17.461	17.4206	17.4894	17.3346	17.4901	17.4427	17.47	17.4012	17.3803	17.4203	17.4651	17.4178	17.7115	17.649	17.4752
Footnotes:ph= phenocryst; mph=micro-phenocryst; m=microlite; gdm=crypto-crystals of the groundmass. bdl= below detection limit
[truncated: 4 more columns]

## Sheet: TableS2e-PCD Oxides
Supplementary Table S2e - Fe-Ti oxides composition of the Post Caldera Dome (PCD) lavas and enclaves
Unit	PCD	PCD	PCD	PCD	PCD	PCD	PCD	PCD	PCD		PCD	PCD	PCD	PCD	PCD	PCD	PCD	PCD	PCD	PCD	PCD	PCD	PCD	PCD	PCD	PCD	PCD	PCD	PCD	PCD	PCD	PCD	PCD	PCD	PCD	PCD	PCD	PCD	PCD
Lithology	dome lava	dome lava	dome lava	Enclave	Enclave	dome lava	dome lava	dome lava	dome lava		dome lava	dome lava	Enclave	Enclave	Enclave	Enclave	Enclave	Enclave	dome lava	Enclave	dome lava	dome lava	dome lava	dome lava	dome lava	dome lava	Enclave	Enclave	Enclave	Enclave	Enclave	Enclave	Enclave	Enclave	Enclave	Enclave	Enclave	Enclave	Enclave
Deposit	Profitis Elias	Profitis Elias	Karaviotis	Trapesina	Trapesina	Karaviotis	Boriatico	Boriatico	Boriatico		Profitis Elias	Profitis Elias	Profitis Elias	Profitis Elias	Profitis Elias	Trapesina	Trapesina	Trapesina	Karaviotis	Karaviotis	Karaviotis	Karaviotis	Boriatico	Boriatico	Boriatico	Boriatico	Boriatico	Boriatico	Boriatico	Boriatico	Boriatico	Boriatico	Boriatico	Boriatico	Boriatico	Boriatico	Boriatico	Boriatico	Boriatico
Type	Older PCD system	Older PCD system	Older PCD system	Older PCD system	Older PCD system	Younger PCD system	Younger PCD system	Younger PCD system	Younger PCD system		Older PCD system	Older PCD system	Older PCD system	Older PCD system	Older PCD system	Older PCD system	Older PCD system	Older PCD system	Older PCD system	Older PCD system	Younger PCD system	Younger PCD system	Younger PCD system	Younger PCD system	Younger PCD system	Younger PCD system	Younger PCD system	Younger PCD system	Younger PCD system	Younger PCD system	Younger PCD system	Younger PCD system	Younger PCD system	Younger PCD system	Younger PCD system	Younger PCD system	Younger PCD system	Younger PCD system	Younger PCD system
Sample	NIS292a	NIS292a	NIS264b	NIS283	NIS278a	NIS267b	NIS324	NIS324	NIS324		NIS292a	NIS292a	NIS293b	NIS293b	NIS293b	NIS283	NIS283	NIS278a	NIS264b	NIS267b	NIS267b	NIS267b	NIS324	NIS324	NIS324	NIS324	NIS310b	NIS310b	NIS310b	NIS310b	NIS310b	NIS310b	NIS310b	NIS310b	NIS310b	NIS310b	NIS310b	NIS310b	NIS327a
Zone	core	core	core	core	core	core	core	core	core		core	core	core	core	core	core	core	core	core	core	core	core	core	core	core	core	core	core	core	core	core	core	core	core	core	core	core	core	core
Size	ph	ph	m	m	mph	mph	ph	mph	mph		ph	ph	m	m	m	m	m	mph	m	m	mph	mph	ph	ph	mph	mph	m	m	m	m	m	m	m	m	m	m	m	m	m
SiO2	0	0.0291	0	0	0.055	0.042	0.019	0	0.1002		0.0703	0.1098	0.0843	0.1197	0.101	0.059	0.076	0.075	1.12	0.224	0.089	0.068	0.1057	0.1055	0.0358	0.0772	0.0267	0.1387	0.1438	0.0387	0	0.1395	0	0.1159	0.035	0.109	0.082	0.079	0
TiO2	41.2461	42.9929	43.74	39.43	40.82	38.235	42.3297	44.4449	41.3375		7.2831	6.8423	7.9205	9.4991	5.9367	7.629	7.923	7.164	5.5	6.867	6.499	7.009	5.97	7.3237	5.4568	12.7401	6.9921	6.0427	6.317	6.1323	6.0857	6.2887	6.4769	6.0761	6.232	6.448	7.039	6.493	5.64
Al2O3	0.2891	0.237	0.21	0.22	0.219	0.196	0.2646	0.2243	0.2238		1.262	1.4147	1.3928	1.7517	1.7566	1.358	1.324	1.515	2.73	2.195	1.326	1.245	1.4767	1.5038	1.2414	0.9607	1.4015	1.3921	1.3719	1.3667	1.365	1.5198	1.4632	1.3996	1.657	1.52	1.298	1.54	1.5
FeO	52.8744	52.4788	49.63	55.59	52.064	54.185	51.1822	50.5867	51.8604		85.2176	86.0296	82.5916	80.9747	83.6391	81.99	83.663	83.085	82.73	81.678	83.719	83.684	84.7422	84.8128	87.3063	79.0908	83.9802	85.1952	85.7648	85.7906	84.4457	85.8179	85.3411	86.741	82.604	82.437	82.852	82.318	86.46
MnO	0.6013	0.7127	0.7	0.42	0.623	0.439	0.511	0.5693	0.5316		0.4721	0.4819	0.4267	0.4508	0.6214	0.355	0.355	0.465	0.42	0.616	0.49	0.539	0.3345	0.3735	0.475	0.3134	0.6415	0.7638	0.7564	0.6808	0.6053	0.6745	0.6741	0.5284	0.646	0.615	0.653	0.693	0.52
MgO	3.0871	2.2632	2.63	1.76	2.364	2.478	1.9477	1.8044	2.8638		1.1892	1.2377	0.9984	1.1098	1.5249	1.044	1.049	1.688	1.32	1.284	1.511	1.144	1.6948	1.6107	1.4812	0.7526	1.4293	1.7064	1.477	1.6684	1.311	1.584	1.7988	1.2289	1.684	1.654	1.401	1.751	1.54
Sum	98.098	98.7137	96.91	97.42	96.145	95.575	96.2542	97.6296	96.9173		95.4943	96.116	93.4143	93.9058	93.5797	92.435	94.39	93.992	93.82	92.864	93.634	93.689	94.3239	95.73	95.9965	93.9348	94.4713	95.2389	95.8309	95.6775	93.8127	96.0244	95.7541	96.0899	92.858	92.783	93.325	92.874	95.66
SiO2	0	0.0291	0	0	0.055	0.042	0.019	0	0.1002		0.0703	0.1098	0.0843	0.1197	0.101	0.059	0.076	0.075	1.12	0.224	0.089	0.068	0.1057	0.1055	0.0358	0.0772	0.0267	0.1387	0.1438	0.0387	0	0.1395	0	0.1159	0.035	0.109	0.082	0.079	0
TiO2	41.2461	42.9929	43.74	39.43	40.82	38.235	42.3297	44.4449	41.3375		7.2831	6.8423	7.9205	9.4991	5.9367	7.629	7.923	7.164	5.5	6.867	6.499	7.009	5.97	7.3237	5.4568	12.7401	6.9921	6.0427	6.317	6.1323	6.0857	6.2887	6.4769	6.0761	6.232	6.448	7.039	6.493	5.64
Al2O3	0.2891	0.237	0.21	0.22	0.219	0.196	0.2646	0.2243	0.2238		1.262	1.4147	1.3928	1.7517	1.7566	1.358	1.324	1.515	2.73	2.195	1.326	1.245	1.4767	1.5038	1.2414	0.9607	1.4015	1.3921	1.3719	1.3667	1.365	1.5198	1.4632	1.3996	1.657	1.52	1.298	1.54	1.5
Fe2O3	24.3509	20.6387	17.4865	27.6029	22.4459	27.3897	19.1024	16.159	22.5488		54.5759	55.6873	51.3802	48.0259	55.5222	51.2376	52.1543	53.5567	52.6998	52.0154	54.8108	53.7235	56.3613	54.569	59.0053	42.1952	54.4965	56.8866	56.7603	57.3196	55.9494	56.7344	56.7161	57.2813	54.7247	54.1606	53.571	54.2054	58.269
FeO	30.963	33.9077	33.8953	30.7524	31.8667	29.5392	33.9935	36.0465	31.5706		36.1092	35.9212	36.3587	37.7601	33.6792	35.8855	36.7336	34.8937	35.3098	34.8736	34.3992	35.3426	34.0273	35.7106	34.2122	41.1228	34.9432	34.0076	34.6909	34.2134	34.1014	34.7673	34.3069	35.1982	33.3617	33.7023	34.6478	33.543	34.0285
MnO	0.6013	0.7127	0.7	0.42	0.623	0.439	0.511	0.5693	0.5316		0.4721	0.4819	0.4267	0.4508	0.6214	0.355	0.355	0.465	0.42	0.616	0.49	0.539	0.3345	0.3735	0.475	0.3134	0.6415	0.7638	0.7564	0.6808	0.6053	0.6745	0.6741	0.5284	0.646	0.615	0.653	0.693	0.52
MgO	3.0871	2.2632	2.63	1.76	2.364	2.478	1.9477	1.8044	2.8638		1.1892	1.2377	0.9984	1.1098	1.5249	1.044	1.049	1.688	1.32	1.284	1.511	1.144	1.6948	1.6107	1.4812	0.7526	1.4293	1.7064	1.477	1.6684	1.311	1.584	1.7988	1.2289	1.684	1.654	1.401	1.751	1.54
Sum	100.538	100.781	98.6618	100.185	98.3937	98.3189	98.1679	99.2484	99.1763		100.962	101.695	98.5617	98.7171	99.142	97.5681	99.6149	99.3574	99.0995	98.075	99.125	99.0711	99.9703	101.197	101.908	98.162	99.9308	100.938	101.517	101.42	99.4178	101.708	101.436	101.828	98.3404	98.2089	98.6918	98.3044	101.497
Number of ions on the basis of 2 cations
Fe3+ estimated on charge balance and Stoichiometry bases
Si	0	0.000722723	0	0	0.00139396	0.00106591	0.00048453	0	0.00251749		0.00261817	0.00406045	0.00321562	0.00453645	0.0038105	0.0022509	0.00285203	0.00280615	0.0419582	0.00848448	0.00334786	0.00256574	0.00396304	0.00390247	0.00132189	0.00295492	0.001002	0.00514691	0.00530608	0.00143159	0	0.00514009	0	0.00428273	0.00132412	0.00413223	0.00310212	0.00299134	0
Al	0.00844448	0.00693723	0.00624894	0.00645535	0.0065417	0.00586256	0.00795273	0.00666988	0.00662703		0.0553937	0.0616588	0.062616	0.0782421	0.0781074	0.0610608	0.0585581	0.066807	0.120537	0.0979876	0.0587868	0.0553646	0.0652537	0.0655596	0.0540234	0.0433386	0.0619883	0.0608835	0.0596618	0.0595854	0.0608151	0.0659997	0.0636993	0.0609538	0.0738826	0.0679142	0.0578733	0.0687256	0.0653578
Fe3+	0.454142	0.38572	0.332232	0.517135	0.428091	0.523084	0.366578	0.306801	0.426319		1.52952	1.54967	1.47484	1.36965	1.5763	1.47097	1.47279	1.50791	1.48566	1.48259	1.55151	1.52538	1.59018	1.51895	1.63951	1.21535	1.53899	1.58852	1.57605	1.59559	1.59157	1.57309	1.57648	1.5928	1.55796	1.54509	1.52505	1.54451	1.62105
Ti	0.768707	0.802949	0.83046	0.738205	0.777988	0.729702	0.811754	0.843265	0.781009		0.203972	0.190277	0.227197	0.270717	0.168429	0.218868	0.223585	0.201566	0.154944	0.195594	0.183838	0.198871	0.168322	0.203718	0.151517	0.366702	0.197323	0.168622	0.175282	0.170586	0.172999	0.174249	0.179908	0.16884	0.177297	0.183821	0.200248	0.184883	0.156797
Mg	0.114058	0.0837939	0.0989907	0.0653223	0.0893194	0.0937528	0.0740457	0.0678693	0.107264		0.0660249	0.0682335	0.0567744	0.0627014	0.0857654	0.0593765	0.0586849	0.0941528	0.0737198	0.0725025	0.084733	0.0643488	0.0947289	0.0888204	0.0815334	0.0429441	0.0799634	0.0943978	0.0812467	0.0920064	0.0738811	0.0870086	0.0990525	0.0676963	0.0949759	0.0934769	0.079012	0.0988406	0.0848748
Fe2+	0.641749	0.704262	0.715688	0.640286	0.675432	0.626943	0.724969	0.760588	0.663344		1.12465	1.11091	1.15985	1.19677	1.06262	1.14493	1.15281	1.09182	1.10624	1.10466	1.08214	1.11521	1.06693	1.10469	1.05645	1.31634	1.09667	1.05536	1.0705	1.05842	1.07807	1.07133	1.05977	1.08771	1.05552	1.0685	1.09617	1.06218	1.05207
Mn	0.0126224	0.0149924	0.0149697	0.00885673	0.013374	0.00943676	0.0110376	0.0121663	0.0113128		0.0148923	0.0150943	0.0137862	0.0144708	0.0198572	0.0114714	0.0112838	0.0147363	0.0133271	0.0197626	0.015612	0.0172258	0.0106227	0.0117021	0.0148556	0.0101605	0.0203911	0.0240069	0.0236403	0.0213311	0.019381	0.0210506	0.0210903	0.0165381	0.0207004	0.0197478	0.0209239	0.0222258	0.0162831
Ca	0	0	0.000811536	0.0237403	0.00103188	0.000516636	0.000838811	0.00264109	0		0	0	0	0	0	0.0020029	0.000522687	0.00212464	0.00361244	0.00401764	0.00181363	0.00153619	0	0	0	0	0	0	0	0	0	0	0	0	0.00466141	0.00284325	0.00170236	0.00186619	0.00356491
A	1.23129	1.19633	1.16954	1.26179	1.22062	1.26923	1.18776	1.15674	1.21647		1.79341	1.80566	1.76959	1.72475	1.82776	1.77888	1.77356	1.79563	1.8031	1.79592	1.81281	1.79856	1.82772	1.79238	1.84716	1.63034	1.80168	1.82623	1.81941	1.82798	1.827	1.82061	1.82009	1.82688	1.82138	1.81205	1.79665	1.81213	1.8432
B	0.768707	0.803671	0.83046	0.738205	0.779381	0.730768	0.812239	0.843265	0.783527		1.20659	1.19434	1.23041	1.27525	1.17224	1.22112	1.22644	1.20437	1.1969	1.20408	1.18719	1.20144	1.17228	1.20762	1.15284	1.36966	1.19832	1.17377	1.18059	1.17202	1.173	1.17939	1.17991	1.17312	1.17862	1.18795	1.20335	1.18787	1.1568
Fe-Ti Oxide system
TiO2	46.9494	47.2366	48.5069	45.0996	46.6631	45.1	47.2009	47.9939	47.1256		9.74368	9.16546	10.6943	12.578	8.34139	10.4459	10.5944	9.85731	7.73166	9.58949	9.01425	9.58749	8.2903	9.85152	7.47228	16.0082	9.56256	8.35487	8.61843	8.41649	8.45191	8.5747	8.87159	8.22423	8.82085	9.0865	9.73393	9.1636	7.76456
FeO	39.1855	41.4206	41.7927	39.1076	40.5018	38.7392	42.1441	43.2776	40.0157		53.7241	53.5115	54.5949	55.604	52.6259	54.2595	54.3983	53.1491	55.2013	53.9747	52.8343	53.5229	52.5494	53.4213	52.1004	57.464	53.1464	52.2912	52.6352	52.2213	52.6696	52.7197	52.2589	52.9829	52.3329	52.6344	53.116	52.4737	52.0985
Fe2O3	13.8651	11.3429	9.70038	15.7928	12.8351	16.1608	10.655	8.7285	12.8587		36.5322	37.3231	34.7108	31.818	39.0328	35.2946	35.0073	36.9936	37.067	36.4358	38.1514	36.8896	39.1603	36.7272	40.4274	26.5278	37.291	39.3539	38.7464	39.3622	38.8784	38.7056	38.8696	38.7929	38.8462	38.2791	37.1501	38.3628	40.137
End-Members following the scheme of Stormer, 1983, Am. Mineral., 68, 586-594										End-Members following the scheme of Stormer, 1983, Am. Mineral., 68, 586-594
ILM'	75.5689	79.5883	82.2726	72.6694	77.2036	72.1146	80.715	83.9247	77.1517	USP'	20.5034	19.1923	23.2598	28.1923	16.9059	22.8086	23.065	20.3668	17.2479	20.6292	18.4558	20.2182	16.7071	20.3823	14.8966	37.562	19.6459	16.5672	17.3365	16.6947	17.1937	17.3523	17.579	16.9498	17.6903	18.3647	19.9952	18.3756	15.4715
HEM'	24.4311	20.4117	17.7274	27.3306	22.7964	27.8854	19.285	16.0753	22.8483	MT'	79.4966	80.8077	76.7402	71.8077	83.0941	77.1914	76.935	79.6332	82.7521	79.3708	81.5442	79.7818	83.2929	79.6177	85.1034	62.438	80.3541	83.4328	82.6635	83.3053	82.8063	82.6477	82.421	83.0502	82.3097	81.6353	80.0048	81.6244	84.5285
Footnotes: ph= phenocryst; mph=micro-phenocryst; m=microlite; gdm= crypto-crystals of the groundmass. ILM=Ilmenite % component; HEM=hematite % component

## Sheet: TableS2f-PCD glasses
Supplementary Table S2f - Representative glass composition of the Post Caldera Dome (PCD) lavas and enclaves
Unit	PCD	PCD	PCD	PCD	PCD	PCD	PCD	PCD	PCD	PCD	PCD	PCD	PCD	PCD	PCD	PCD	PCD	PCD	PCD	PCD	PCD	PCD	PCD	PCD	PCD	PCD	PCD	PCD	PCD	PCD	PCD	PCD	PCD	PCD	PCD	PCD	PCD	PCD	PCD	PCD	PCD
Lithology	dome lava	dome lava	Enclave	dome lava	dome lava	dome lava	dome lava	dome lava	Enclave	Enclave	Enclave	Enclave	Enclave	Enclave	dome lava	dome lava	dome lava	dome lava	dome lava	dome lava	Encave	Encave	Encave	Encave	Enclave	Enclave	Enclave	Enclave	dome lava	dome lava	dome lava	Enclave	Enclave	Enclave	dome lava	Enclave	Enclave	Enclave	Enclave	Enclave	Enclave
Deposit	Profitis Ilias	Profitis Ilias	Profitis Ilias	Profitis Elias	Profitis Elias	Profitis Elias	Trapesina	Trapesina	Trapesina	Trapesina	Trapesina	Trapesina	Trapesina	Trapesina	Trapesina	Trapesina	Trapesina	Trapesina	Trapesina	Trapesina	Trapesina	Trapesina	Trapesina	Trapesina	Nifios	Karaviotis	Karaviotis	Karaviotis	Karaviotis	Karaviotis	Karaviotis	Karaviotis	Karaviotis	Boriatico	Boriatico	Boriatico	Boriatico	Boriatico	Boriatico	Boriatico	Boriatico
Type	Older PCD system	Older PCD system	Older PCD system	Older PCD system	Older PCD system	Older PCD system	Older PCD system	Older PCD system	Older PCD system	Older PCD system	Older PCD system	Older PCD system	Older PCD system	Older PCD system	Older PCD system	Older PCD system	Older PCD system	Older PCD system	Older PCD system	Older PCD system	Older PCD system	Older PCD system	Older PCD system	Older PCD system	Younger PCD system	Younger PCD system	Younger PCD system	Younger PCD system	Younger PCD system	Younger PCD system	Younger PCD system	Younger PCD system	Younger PCD system	Younger PCD system	Younger PCD system	Younger PCD system	Younger PCD system	Younger PCD system	Younger PCD system	Younger PCD system	Younger PCD system
Sample	NIS287b	NIS287b	NIS297	NIS292a	NIS292a	NIS292a	NIS286a	NIS286a	NIS278b	NIS278b	NIS278b	NIS278	NIS278	NIS278	NIS286	NIS286	NIS286	NIS286	NIS286	NIS286	NIS283	NIS283	NIS283	NIS283	NIS288	NIS267b	NIS267b	NIS267b	NIS264b	NIS264b	NIS267b	NIS267b	NIS267b	NIS327a	NIS324	NIS310b	NIS310b	NIS310b	NIS310b	NIS310b	NIS310b
SiO2	76.09	77.4	75.69	77.7676	77.9082	79.2067	73.6793	74.7643	74.17	74.89	76.82	76.29	74.92	74.2	77.129	77.821	76.918	78.22	76.095	77.915	74.289	74.58	74.223	74.324	75.37	74.449	75.059	76.021	77.12	76.26	76.9386	75.0203	74.2878	75.91	78.5178	75.301	74.777	75.172	74.227	76.448	74.815
TiO2	0.32	0.32	0.16	0.3367	0.2481	0.358	0.29	0.27	0.43	0.4	0.53	0.35	0.34	0.34	0.348	0.332	0.312	0.32	0.318	0.32	0.197	0.191	0.149	0.182	0.31	0.526	0.353	0.322	0.17	0.39	0.37	0.62	0.58	0.72	0.3136	0.226	0.238	0.188	0.202	0.229	0.275
Al2O3	11.79	11.08	13	10.765	10.6637	10.9176	13.576	13.1453	12.63	12.69	11.69	12.1	12.52	12.06	10.821	11.206	11.327	10.847	10.798	10.92	12.105	12.243	12.551	12.232	12.11	13.602	12.127	12.22	11.17	12.34	11.97	13.33	13.87	11.67	10.7106	11.533	11.117	11.369	11.42	11.542	11.207
Cr2O3	0.02	0	0.03	0.052	0.0609	0.0483	0	0.04	0	0.03	0	0.05	0.05	0.03											0				0	0	0	0	0.01	0	0
FeO	0.97	0.85	1.51	1.1365	1.0674	1.104	0.884367	0.937965	1.29	1.17	0.96	1.05	1.06	1.14	1.183	1.251	1.041	1.268	1.023	1.138	1.299	1.53	1.128	1.398	1.13	1.388	1.348	1.327	1.18	1.26	1.35858	1.7866	1.88486	1.2	1.0007	1.005	0.999	0.879	1.133	0.909	1.103
MnO	0.03	0.01	0	0.0399	0.0087	0.0615	0.04	0	0.07	0	0.03	0.07	0.1	0	0	0.028	0.016	0	0.047	0.014	0.055	0.03	0.02	0.03	0	0.01	0.043	0.041	0.09	0.02	0	0.08	0.05	0.04	0.0136	0.045	0.016	0.057	0.022	0.075	0.012
MgO	0.05	0.03	0.18	0.0529	0.1115	0.0286	0.04	0.05	0.06	0.11	0.13	0.12	0.16	0.1	0.065	0.067	0.071	0.058	0.075	0.06	0.139	0.167	0.138	0.139	0.12	0.146	0.199	0.058	0.11	0.06	0.53	0.16	0.15	0.03	0.0537	0.115	0.092	0.158	0.171	0.169	0.128
CaO	0.61	0.29	0.73	0.452	0.492	0.367	1.55188	1.33018	0.37	0.25	0.57	0.42	0.5	0.42	0.462	0.48	0.617	0.39	0.414	0.411	0.577	0.384	0.474	0.485	0.59	1.026	0.894	0.912	0.63	0.63	0.86	1.57882	0.170172	0.41	0.2465	0.559	0.477	0.551	0.59	0.613	0.528
Na2O	2.7	2.27	2.81	2.6498	2.9207	1.3721	3.62	3.59	2.27	1.74	2.27	2.21	2.78	2.31	3.009	3.031	3.06	2.978	2.893	2.976	2.506	2.498	2.424	2.319	2.31	3.707	3.408	3.538	1.64	1.77	2.1	3.11	2.4	1.59	1.561	3.331	3.202	3.383	3.44	3.547	3.25
K2O	5.44	5.67	5.55	5.5213	5.9219	4.3753	3.81	4.27	5.26	5.28	5.16	4.5	5.11	4.9	4.896	4.806	4.771	5.006	4.81	4.924	5.281	5.529	5.147	5.518	5.01	4.241	4.213	4.618	4.58	4.91	5.26	3.83	5.2	4.63	5.0995	4.411	4.223	4.51	4.421	4.188	4.357
P2O5	nd	0.02	0.07	0	0.0381	0		0	0.05	0		0	0.06	0.14	0.055	0.034	0.051	0.038	0.06	0.041	0.067	0.036	0.03	0.011	0	0.217	0.083	0.171			0	0.37	0.32	0.12	0.1118	0.029	0.014	0.058	0.027	0.005	0.037
Cl	0.13	0.13	0.17	0.1735	0.2611	0.1107		0.14	0.36	0.19	0.22	0.22	0.22	0.29	0.151	0.139	0.115	0.141	0.15	0.138	0.164	0.237	0.217	0.232	0.16	0.165	0.15	0.163		0.21	0.05	0.2	0.26	0.26	0.1865	0.141	0.149	0.181	0.263	0.197	0.187
Somma	98.15	98.07	99.9	98.9754	99.7023	98.03	97.4915	98.5377	96.96	96.75	98.38	97.38	97.82	95.93	98.119	99.195	98.299	99.266	96.683	98.857	96.679	97.425	96.501	96.87	97.11	99.477	97.877	99.391	96.69	97.85	99.4372	100.086	99.1828	96.58	97.8153	96.696	95.304	96.506	95.916	97.922	95.899

## Sheet: TableS2g-ReferenceStandard
Supplementary Table S2g - Within run analytical results on representative international secondary standards compared to certified values and long term accuracy and reproducibility
	JEOL JXA8600 - within run standard																		JEOL JXA8230 - within run standard
Data	2006-06-27	2006-06-28	2006-11-23	2006-11-23	2006-11-29	2006-11-29	2006-11-30	2006-11-30	2006-11-30	2016-07-26	2016-07-27								2024-10-29	2024-10-29
Reference Standard	Smithsonian - Augite Kakanui New Zeland (USNM 122142)																		Smithsonian - Augite Kakanui						Smithsonian
Oxides (wt.%)												Within run average	sd	n=12	Long term average**	sd	n=254				Within run average	sd	n=2		Certified*
SiO2	50.64	49.93	51.44	50.81	50.98	50.61	51.37	50.96	50.69	50.2818	49.4827	50.654	0.582476		50.25	0.43			49.902	50.478	50.19	0.407294			50.73
TiO2	0.85	0.85	0.23	0.16	0.88	0.81	0.82	0.81	0.83	0.7997	0.8922	0.721082	0.262182		0.85	0.04			0.844	0.821	0.8325	0.0162635			0.74
Al2O3	8.25	8.53	8.46	8.32	8.46	8.34	8.4	8.58	8.45	8.6377	8.633	8.46006	0.127517		8.36	0.14			8.456	8.498	8.477	0.0296985			8.73
Cr2O3	0.22	0.19	0.1	0.17	0.11	0.17	0.08	0.07	0.22	0.1584	0.0324	0.138255	0.063232		0.13	0.06			0.157	0.141	0.149	0.0113137			0.2
FeO	6.43	6.46	6.31	6.48	6.46	6.42	6.03	5.56	6.22	6.5756	6.4915	6.31246	0.292031		6.41	0.3			6.106	6.17	6.138	0.0452548			6.34
MnO	0.22	0.14	0.17	0.1	0.09	0.17	0.13	0.13	0.2	0.1024	0.1346	0.144273	0.0416438		0.15	0.07			0.145	0.139	0.142	0.00424264			0.13
MgO	15.89	16.24	16.55	16.56	16.3	16.54	16.56	16.83	16.79	16.6177	16.638	16.5014	0.267745		16.39	0.21			16.21	16.351	16.2805	0.0997021			16.65
CaO	16.08	16.69	15.95	16.05	16.3	16.37	16.25	16.05	16.17	16.2971	15.61	16.1652	0.273587		15.97	0.24			16.021	15.925	15.973	0.0678823			15.82
Na2O	1.26	1.31	1.25	1.29	1.22	1.23	1.06	1.2	1.33	1.1764	1.3395	1.24235	0.0802398		1.3	0.08			1.3	1.341	1.3205	0.0289914			1.27
K2O	bdl	bdl	bdl	bdl	bdl	bdl	bdl	bdl	bdl	bdl	bdl								bdl	bdl	-	-
Total	99.84	100.34	100.46	99.94	100.8	100.66	100.7	100.19	100.9	100.64	99.2539	100.339			99.81				99.141	99.865	99.5025				100.61
Data	2006-11-22	2006-11-23	2006-11-23	2006-11-29	2006-11-30	2006-11-30	2006-11-30	2006-12-01	2006-12-01	2016-07-26									2024-10-29
Reference Standard	Astimex - Plagioclase PLG 35																		Astimex - Plagioclase						Atimex
Oxides (wt.%)												Within run average	sd	n=10	Long term average**	sd	n=27								Certified**
SiO2	52.74	53.37	52.83	53.06	53.88	54.16	53.4	52.74	53.02	52.0784		53.1278	0.602856		53.18	0.47			53.423						54.21
TiO2	0.06	0.04	0.04	0.1	0.06	0.05	0.07	0.04	nd	0.0502		0.0566889	0.0193564		0.07	0.04			0.105						0.07
Al2O3	28.89	30.07	29.25	29.64	29.71	29.36	29.7	29.21	29.66	29.5201		29.501	0.332147		29.46	0.45			29.303						28.53
FeO	0.59	0.41	0.46	0.44	0.36	0.29	0.4	0.6	0.5	0.4759		0.45259	0.0961502		0.44	0.06			0.441						0.37
MgO	0.11	0.1	0.07	0.07	0.11	0.1	0.13	0.06	0.09	0.1101		0.09501	0.0222436		0.1	0.03			0.096						0.13
CaO	12.49	11.95	12.16	12.04	11.86	12.13	12.05	12.29	11.95	12.7233		12.1643	0.268436		12.13	0.19			11.945						11.8
Na2O	4.39	4.23	4.48	4.04	3.98	4.13	4	4.31	3.78	4.0428		4.13828	0.213286		4.21	0.22			4.366						4.35
K2O	0.01	0.36	0	0.38	0.31	0.41	0.33	0.35	0.37	0.4647		0.29847	0.160452		0.35	0.02			0.344						0.41
SrO	nd	nd	nd	nd	nd	nd	nd	0.37	0.38	nd		0.375	0.00707107		0.18	0.04			0.152						0.08
BaO	nd	nd	nd	nd	nd	nd	nd	bdl	0.04	nd		0.04	-						0.069						0.01
Total	99.28	100.53	99.29	99.77	100.27	100.63	100.08	99.97	99.79	99.4655		100.249			100.12				100.268						99.96
Data	2006-06-27	2006-06-29	2006-11-22	2006-11-23	2006-11-29	2006-11-30	2006-12-01
Reference Standard	Astimex - Sanidine SAN41																								Atimex
Oxides (wt.%)												Within run average	sd	n=7	Long term average**	sd	n=73								Certified**
SiO2	64.96	64.66	64.87	65.19	64.32	65.11	64.64					64.8214	0.303064		64.5	0.46									64.67
TiO2	bdl	bdl	bdl	bdl	bdl	bdl	bdl
Al2O3	18.59	18.92	19.05	19.17	18.84	18.88	19.44					18.9843	0.270115		19.02	0.32									18.76
FeO	0.09	0.17	0.18	0.13	0.1	0	0.22					0.127143	0.0725062		0.15	0.07									0.18
MgO	0.02	0	0	0	0	0	0					0.00285714	0.00755929
CaO	0.03	0.02	0	0	0	0	0					0.00714286	0.0125357
Na2O	2.85	2.98	2.57	2.8	3.04	2.7	2.84					2.82571	0.159359		2.82	0.16									3.01
K2O	12.63	12.44	11.12	12	11.75	11.65	12.12					11.9586	0.50864		12.23	0.21									12.11
SrO	0.12	0.11	0.18	0.08	0.21	0.12	0.15					0.138571	0.0445079		0.22	0.08
BaO	0.42	1.58	1.14	0.38	1.18	1.32	1.31					1.04714	-		1.26	0.07									1.09
Total	99.71	100.88	99.11	99.75	99.44	99.78	100.72					99.9129			100.2										99.82
Data	2006-11-22	2006-11-22	2006-11-22	2006-11-23	2006-11-23	2006-11-29	2006-11-30	2006-11-30	2006-11-30	2006-12-01									2024-10-29	2024-10-29
Reference Standard	Olivine San Carlos - Meinz																		Smithsonian - Olivine San Carlos						Smithsonian
Oxides (wt.%)												Within run average	sd	n=10	Long term average	sd					Within run average	sd	n=2		Certified*
SiO2	40.7	40.63	40.65	40.71	40.98	40.82	40.55	40.68	40.34	40.4		40.646	0.186679		40.1818				40.612	40.495	40.5535	0.0827315			40.81
TiO2	0.02	0	0	0.06	0	0	0.04	0	0	0					0.0253158				0.024	0.02	0.022	0.00282843
Al2O3	0.02	0.02	0	0.02	0	0.04	0	0	0	0		0.01	0.0141421		0.0200526				0.033	0.03	0.0315	0.00212132
Cr2O3	0	0.03	0.05	0	0.02	0	0.02	0.07	0	0.04		0.023	0.0245176		0.0174316				0.013	bdl	0.013	-
FeO	10.79	10.15	10.66	10.18	10.98	10.57	10.85	10.05	10.02	10.55		10.48	0.353365		10.1762				9.671	9.657	9.664	0.00989949			9.55
MnO	0.1	0.14	0.17	0.1	0.13	0.1	0.16	0.09	0.17	0.01		0.117	0.0485455		0.141263				0.153	0.145	0.149	0.00565685			0.14
NiO	0.33	0.29	0.39	0.38	0.39		0.47	0.42		0.31		0.3725	0.0597016		0.354726				0.344	0.322	0.333	0.0155563			0.37
MgO	49.05	48.48	48.87	48.46	48.9	49	48.96	48.91	49.05	49.48		48.916	0.29125		49.2433				49.18	49.091	49.1355	0.0629325			49.42
CaO	0.07	0.06	0.08	0.09	0.06	0.06	0.09	0.07	0.09	0.04		0.071	0.0166333		0.0882632				0.094	0.091	0.0925	0.00212132			0.05
													-
Total	101.08	99.8	100.87	100	101.46	100.59	101.14	100.29	99.67	100.83		100.636			100.248				100.124	99.851	99.994				99.54
Data	2016-07-26																		2024-10-29	2024-10-29
Reference Standard	Smithsonian - Hornblende Kakanui																		Smithsonian - Hornblende Kakanui						Smithsonian
Oxides (wt.%)															Long term average**	sd	n=34								Certified*
SiO2	40.2678														40.37	0.4			39.673						40.37
TiO2	4.5752														4.79	0.13			4.615						4.72
Al2O3	14.5944														14.27	0.29			14.254						14.9
Cr2O3	0.1093																		0.054						0.09
FeO	10.7112														10.77	0.28			10.559						10.92
MnO	0.1586														0.11	0.03			0.075						0.09
MgO	12.8543														12.64	0.2			12.653						12.8
CaO	9.8362														10.11	0.14			9.946						10.3
Na2O	2.4091														2.64	0.14			2.602						2.6
K2O	1.9633														2.11	0.06			2.105						2.05
SrO															0.32	0.04			0.115
BaO																			0.332
Cl																			0.019
F																			bdl
Total	97.4794														98.13				97.002						98.84
																		Data	2024-10-30	2024-11-04
																		Reference Standard	Astimex - Obsidian						Atimex
																		Oxides (wt.%)			Within run average	sd	n=2		Certified**
																		SiO2	73.666	74.315	73.9905	0.458912			73.94
																		TiO2	0.08	0.078	0.079	0.00141421			0.1
																		Al2O3	12.929	13.095	13.012	0.11738			13.11
																		Cr2O3	1.531	1.401	1.466	0.0919239			1.72
																		FeO	0.045	0.055	0.05	0.00707107			0.06
																		MnO	0.025	0.047	0.036	0.0155563			0.07
																		MgO	0.731	0.7	0.7155	0.0219203			0.76
																		CaO	4.057	4.032	4.0445	0.0176777			4.06
																		Na2O	5.148	5.107	5.1275	0.0289914			5.04
																		K2O	0.017	0.018	0.0175	0.000707107
																		SO3	0	0	0	0
																		Cl	0.347	0.341	0.344	0.00424264			0.36
																		F	0.232	0.201	0.2165	0.0219203			0.07
																		Total	98.808	99.39	98.5385				99.29
																		Data	2024-10-29
																		Reference Standard	Smithsonian - Ilmenite						Smithsonian
																		Oxides (wt.%)							Certified*
																		SiO2	0.027
																		TiO2	45.685						45.7
																		Al2O3	0.028
																		Cr2O3	0.24
																		V	0
																		FeO	45.878						46.54
																		MnO	4.604						4.77
																		MgO	0.271						0.31
																		CaO	0
																			0.033
																			0.074
																		Nb2O5	1						0.92
																			97.84						98.24
Footnotes: * Jarosewich,E.,Nelen,J.A.,andNorberg,J.A.(1980) ReferenceSamplesforElectronMicroprobeAnalysis.Geostandards Newsletter4,p.43-47; ** Astimex Ltd. Toronto (Canada); Vaggelli, G., Olmi, F., Conticelli, S. (1999) Quantitative electron microprobe analyses of refrence silicate minerals and galss samples. Acta Volcanologica - Vol. 11 (2): 297-303.

## Sheet: TableS3-P-T results on cpx
Supplementary Table S3 - P-T results for clinopyroxene from geothermobarometer of Chicchie et al.,. 2023 and Higgins et al., 2022
		Samples					Major Elements													-	Site T				-	Site M1&M2											-	Classifications					-	Components
Activity	Deposit	Type	Sample	Zone	Size	Note	SiO2	TiO2	Al2O3	Cr2O3	Fe2O3	FeO	MnO	NiO	MgO	CaO	Na2O	K2O	tot	-	Si	Al	Ti	Fe3	-	Mg	Fe2	Fe3	Al	Ti	Cr	Ni	Mn	Ca	Na	K	-	Fs	Wo	En	Q	J	-	CaTiAl2O6	CaTs	Es	CaCrTs	NaCrSi2O6	Jd
UP	Fallout	Pumice	NIS315	core	m		51.81	0.4	1.6	0.03	0.85	9.12	0.48		13.9	21.8			99.98		1.941	0.059	0	0		0.776	0.286	0.024	0.012	0.011	0.001		0.015	0.875				16.435	44.2804	39.2846	1.94	0		0.011	0.012	0.024	0.001	0	0
UP	Fallout	Pumice	NIS317	core	m		52.84	0.02	0.61	0.05	2.39	8.23	0.66		13.6	22.26	0.32	0.01	101.01		1.964	0.027	0.001	0.009		0.754	0.256	0.058	0	0	0.001		0.021	0.886	0.023	0.001		16.9533	44.8846	38.1621	1.9	0.05		0	0	0.036	0	0.001	0
UP	Lag-breccia	Type-A	NIS420	core	mph		52.87	0.3	0.93	0	0.38	11	0.29		14.31	19.98	0.24	0	100.3		1.974	0.026	0	0		0.796	0.344	0.011	0.015	0.009	0		0.009	0.799	0.017	0		18.5457	40.8037	40.6505	1.94	0.03		0.009	0.005	0.004	0	0	0.01
UP	Fallout	Type-A	NIS369a	core	m		51.73	0.66	1.93	0	0.26	11.86	0.37		13.48	19.46	0.27	0.01	100.02		1.945	0.055	0	0		0.755	0.373	0.007	0.03	0.019	0		0.012	0.784	0.019	0		20.291	40.5943	39.1147	1.91	0.04		0.019	0.014	0.003	0	0	0.016
UP	Fallout	Type-B	NIS318	core	mph		52.44	0.28	1.05	0.04	1.78	9.59	0.47		13.4	21.38	0.35	0	100.79		1.956	0.044	0	0		0.745	0.299	0.05	0.002	0.008	0.001		0.015	0.854	0.025	0		18.5394	43.5036	37.957	1.9	0.05		0.008	0.001	0.027	0	0.001	0.001
UP	Lag-breccia	Type-B	NIS424	core	mph		52.36	0.33	1.05	0	2.64	7.98	0.38		13.96	21.74	0.37	0.03	100.83		1.945	0.046	0.009	0		0.773	0.248	0.074	0	0	0		0.012	0.865	0.027	0.001		16.9205	43.8808	39.1987	1.89	0.05		0	0	0.046	0	0	0
UP	Lag-breccia	Type-B	NIS424	core	mph		51.88	0.29	1.24	0	1.47	9.24	0.4		13.98	20.46	0.33	0	99.28		1.955	0.045	0	0		0.785	0.291	0.042	0.01	0.008	0		0.013	0.826	0.024	0		17.6642	42.2073	40.1285	1.9	0.05		0.008	0.006	0.023	0	0	0.005
UP	Lag-breccia	Type-B	NIS424	core	mph		52.64	0.18	0.61	0.02	0.41	8.5	0.3		14.4	21.49	0.24	0	98.8		1.984	0.016	0	0		0.809	0.268	0.012	0.011	0.005	0.001		0.009	0.868	0.017	0		14.6972	44.1412	41.1616	1.94	0.03		0.005	0.003	0.003	0	0.001	0.008
UP	Lag-breccia	Type-B	NIS424	core	mph		52.48	0.25	1.03	0	1.17	8.63	0.32		14.42	20.95	0.32	0	99.57		1.965	0.035	0	0		0.805	0.27	0.033	0.011	0.007	0		0.01	0.841	0.023	0		16.0034	42.9139	41.0827	1.92	0.05		0.007	0.005	0.016	0	0	0.006
UP	Lag-breccia	Type-B	NIS424	core	mph		51.74	0.15	0.58	0.01	1.78	7.67	0.37		14.8	20.89	0.17	0	98.17		1.964	0.026	0.004	0.006		0.837	0.243	0.045	0	0	0		0.012	0.849	0.013	0		15.0969	42.7498	42.1532	1.93	0.03		0	0	0.032	0	0	0
UP	Lag-breccia	Type-B	NIS424	core	mph		51.3	0.25	0.91	0	2.36	7.22	0.23		14.14	21.56	0.28	0	98.25		1.949	0.041	0.007	0.003		0.801	0.229	0.065	0	0	0		0.007	0.877	0.021	0		15.2083	44.3232	40.4686	1.91	0.04		0	0	0.044	0	0	0
UP	Lag-breccia	Type-C	NIS426	core	mph		51.49	0.52	3.93	0.05	1.63	3.71	0.15		16.91	20.91	0.26	0.01	99.59		1.887	0.113	0	0		0.924	0.114	0.045	0.057	0.014	0.001		0.005	0.821	0.019	0		8.57146	43.0165	48.4121	1.86	0.04		0.014	0.047	0.037	0	0.001	0.01
UP	Lag-breccia	Type-C	NIS426	core	mph		49.54	0.8	4.86	0.02	2.73	5.34	0.23		15.08	20.1	0.36	0.02	99.09		1.846	0.154	0	0		0.838	0.166	0.076	0.059	0.022	0.001		0.007	0.803	0.026	0.001		13.2279	42.4557	44.3164	1.81	0.05		0.022	0.048	0.061	0	0.001	0.011
UP	Lag-breccia	Type-C	NIS426	core	mph		52.72	0.22	1.03	0.01	1.53	7.77	0.29		14.8	21.38	0.29	0.01	100.06		1.961	0.039	0	0		0.821	0.242	0.043	0.006	0.006	0		0.009	0.852	0.021	0.001		14.9438	43.3234	41.7328	1.91	0.04		0.006	0.003	0.024	0	0	0.002
UP	Lag-breccia	Type-C	NIS426	core	mph		51.48	0.51	3.92	0.04	1.42	3.82	0.14		16.68	21.49	0.17	0	99.68		1.887	0.113	0	0		0.911	0.117	0.039	0.056	0.014	0.001		0.004	0.844	0.012	0		8.38696	44.0499	47.5631	1.87	0.02		0.014	0.05	0.035	0	0.001	0.006
UP	Lag-breccia	Type-C	NIS426	rim	mph		51.78	0.52	2.27	0	1.29	6.93	0.24		15.02	21.36	0.23	0	99.65		1.926	0.074	0	0		0.833	0.216	0.036	0.025	0.015	0		0.007	0.851	0.016	0		13.3372	43.801	42.8619	1.9	0.03		0.015	0.018	0.026	0	0	0.007
UP	Lag-breccia	Type-C	NIS426	rim	mph		52.68	0.15	0.95	0.06	0.74	8.78	0.34		14.49	21.19	0.21	0	99.61		1.971	0.029	0	0		0.809	0.275	0.021	0.013	0.004	0.002		0.011	0.85	0.016	0		15.6068	43.2444	41.1488	1.93	0.03		0.004	0.008	0.012	0	0.002	0.005
UP	Lag-breccia	Type-C	NIS426	core	mph		51.07	0.75	5.42	0.05	0	5.33	0.16		16.34	20.04	0.28	0.04	99.46		1.873	0.127	0	0		0.893	0.163	0	0.107	0.021	0.001		0.005	0.788	0.02	0.002		9.10128	42.5904	48.3083	1.84	0.04		0.021	0.086	0	0	0.001	0.018
UP	Lag-breccia	Type-C	NIS426	rim	mph		52.73	0.18	1	0.01	0.44	9.31	0.34		14.54	20.72	0.23	0.01	99.51		1.975	0.025	0	0		0.812	0.292	0.012	0.019	0.005	0		0.011	0.832	0.016	0.001		16.0719	42.4604	41.4677	1.94	0.03		0.005	0.009	0.006	0	0	0.01
UP	Lag-breccia	Type-C	NIS426	core	mph		52.54	0.3	1.21	0	1.03	8.69	0.24		14.47	21.19	0.26	0.01	99.93		1.96	0.04	0	0		0.805	0.271	0.029	0.013	0.008	0		0.008	0.847	0.019	0		15.6991	43.2305	41.0704	1.92	0.04		0.008	0.007	0.016	0	0	0.006
UP	Lag-breccia	Type-C	NIS426	core	mph		52.58	0.28	1.2	0.02	0.78	8.96	0.25		14.28	21.2	0.28	0	99.82		1.965	0.035	0	0		0.795	0.28	0.022	0.018	0.008	0.001		0.008	0.849	0.02	0		15.8516	43.4376	40.7109	1.92	0.04		0.008	0.009	0.011	0	0.001	0.009
UP	Lag-breccia	Type-C	NIS426	core	mph		52.46	0.45	3.16	0.04	1.32	3.82	0.14		17.55	21	0.21	0	100.15		1.909	0.091	0	0		0.952	0.116	0.036	0.044	0.012	0.001		0.004	0.819	0.015	0		8.12609	42.4882	49.3857	1.89	0.03		0.012	0.037	0.03	0	0.001	0.008
UP	Lag-breccia	Type-C	NIS426	core	mph		50	0.92	5.56	0.03	2.09	3.64	0.14		15.97	21.23	0.25	0.01	99.81		1.834	0.166	0	0		0.873	0.112	0.058	0.075	0.025	0.001		0.004	0.835	0.018	0		9.21551	44.3659	46.4186	1.82	0.04		0.025	0.065	0.05	0	0.001	0.01
UP	Lag-breccia	Type-C	NIS426	core	mph		52.42	0.24	1.01	0.01	1.69	7.62	0.29		14.7	21.29	0.32	0.01	99.59		1.959	0.041	0	0		0.819	0.238	0.048	0.003	0.007	0		0.009	0.852	0.023	0.001		14.9906	43.3548	41.6546	1.91	0.05		0.007	0.002	0.026	0	0	0.001
UP	Lag-breccia	Type-C	NIS426	core	mph		50.66	0.62	4.13	0.04	1.87	3.5	0.14		16.65	20.96	0.2	0	98.79		1.873	0.127	0	0		0.918	0.108	0.052	0.053	0.017	0.001		0.005	0.831	0.014	0		8.61834	43.4153	47.9663	1.86	0.03		0.017	0.047	0.045	0	0.001	0.007
UP	Lag-breccia	Type-C	NIS426	rim	mph		51.61	0.43	1.92	0.02	1.62	6.75	0.26		15.06	21.07	0.27	0	99		1.932	0.068	0	0		0.84	0.211	0.046	0.017	0.012	0		0.008	0.845	0.02	0		13.5878	43.3318	43.0804	1.9	0.04		0.012	0.012	0.032	0	0	0.005
UP	Lag-breccia	Type-C	NIS426	core	m		51.76	0.31	1.09	0.03	1.92	7.6	0.26		14.51	21.23	0.26	0.02	98.98		1.949	0.048	0.003	0		0.815	0.239	0.054	0	0.006	0.001		0.008	0.856	0.019	0.001		15.3045	43.4031	41.2925	1.91	0.04		0.006	0	0.036	0	0.001	0
PCD	Profitis Elias	dome lava	NIS287b	core	m	Older PCD system	51.89	0.42	2.02	0	2.58	6.31	0.32		15.16	21.33	0.29	0.03	100.35		1.92	0.08	0	0		0.836	0.195	0.072	0.008	0.012	0		0.01	0.845	0.021	0.001		14.1443	43.167	42.6887	1.88	0.04		0.012	0.005	0.052	0	0	0.002
PCD	Profitis Elias	dome lava	NIS287b	core	m	Older PCD system	53.13	0.4	2.19	0.02	2.31	5.02	0.12		18.27	19.27	0.29	0.05	101.07		1.922	0.078	0	0		0.985	0.152	0.063	0.015	0.011	0.001		0.004	0.747	0.02	0.002		11.2001	38.2891	50.5108	1.88	0.04		0.011	0.011	0.045	0	0.001	0.004
PCD	Profitis Elias	dome lava	NIS292a	core	m	Older PCD system	52.76	0.18	0.62	0	2.28	8.71	0.52		13.97	21.03	0.43	0.06	100.55		1.966	0.027	0.005	0.001		0.776	0.271	0.062	0	0	0		0.016	0.84	0.031	0.003		17.8146	42.7094	39.4759	1.89	0.06		0	0	0.029	0	0	0
PCD	Profitis Elias	dome lava	NIS292a	core	m	Older PCD system	50.66	0.67	2.9	0.01	2.75	6.77	0.3		15.63	19	0.3	0.17	99.17		1.893	0.107	0	0		0.871	0.212	0.077	0.021	0.019	0		0.009	0.761	0.022	0.008		15.4672	39.425	45.1079	1.84	0.04		0.019	0.015	0.054	0	0	0.005
PCD	Profitis Elias	Enclave	NIS287b	core	m	Older PCD system	49.63	0.8	5.52	0.05	4.73	3.31	0.15		15.69	21.01	0.37	0	101.25		1.807	0.193	0	0		0.852	0.101	0.13	0.044	0.022	0.001		0.005	0.82	0.026	0		12.3197	42.9999	44.6803	1.77	0.05		0.022	0.038	0.111	0	0.001	0.006
PCD	Profitis Elias	Enclave	NIS287b	core	m	Older PCD system	53	0.34	2.09	0.1	2.25	3.68	0.22		18.1	21.01	0.13	0	100.92		1.919	0.081	0	0		0.977	0.111	0.061	0.008	0.009	0.003		0.007	0.815	0.009	0		9.09733	41.3441	49.5585	1.9	0.02		0.009	0.007	0.056	0	0.003	0.001
PCD	Profitis Elias	Enclave	NIS287b	core	m	Older PCD system	51.13	0.63	3.73	0	3.34	5.06	0.25		15.76	21.11	0.27	0	101.28		1.866	0.134	0	0		0.857	0.154	0.092	0.027	0.017	0		0.008	0.825	0.019	0		13.1152	42.6162	44.2685	1.84	0.04		0.017	0.022	0.077	0	0	0.004
PCD	Profitis Elias	Enclave	NIS287b	core	m	Older PCD system	48.59	1.32	7.09	0	3.09	4.07	0.1		14.69	21.34	0.31	0.05	100.65		1.78	0.22	0	0		0.802	0.125	0.085	0.086	0.036	0		0.003	0.838	0.022	0.002		11.494	45.2066	43.2994	1.76	0.04		0.036	0.074	0.073	0	0	0.011
PCD	Profitis Elias	Enclave	NIS297	core	m	Older PCD system	49.15	1.11	6.73	0	2.04	4.95	0.12		15.14	21.63	0	0	100.86		1.797	0.203	0	0		0.825	0.151	0.056	0.086	0.031	0		0.004	0.847	0	0		11.2035	44.9849	43.8115	1.82	0		0.031	0.086	0.056	0	0	0
PCD	Trapesina	dome lava	NIS286a	core	ph	Older PCD system	51.45	0.13	0.71	0	3.54	6.23	0.67		14.37	21.25	0.38	0.04	98.78		1.945	0.032	0.004	0.02		0.81	0.197	0.081	0	0	0		0.021	0.861	0.028	0.002		15.203	43.6932	41.1038	1.87	0.06		0	0	0.051	0	0	0
PCD	Trapesina	dome lava	NIS286a	rim	ph	Older PCD system	51.5	0.11	0.73	0	3.55	6.27	0.67		14.51	21.32	0.32	0.02	99.01		1.942	0.033	0.003	0.022		0.816	0.198	0.079	0	0	0		0.021	0.862	0.023	0.001		15.0908	43.6126	41.2966	1.88	0.05		0	0	0.055	0	0	0
PCD	Trapesina	dome lava	NIS286a	core	ph	Older PCD system	50.94	0.14	0.82	0	3.84	6.39	0.55		14.24	20.97	0.39	0.01	98.3		1.937	0.037	0.004	0.022		0.807	0.203	0.088	0	0	0		0.018	0.855	0.029	0		15.6748	43.3626	40.9625	1.87	0.06		0	0	0.059	0	0	0
PCD	Trapesina	dome lava	NIS286a	core	m	Older PCD system	52.17	0.27	2.44	0.09	2.12	4.36	0.27		18.87	18.29	0.14	0.09	99.11		1.916	0.084	0	0		1.033	0.134	0.059	0.022	0.007	0.003		0.008	0.72	0.01	0.004		10.274	36.8462	52.8797	1.89	0.02		0.007	0.019	0.05	0	0.003	0.002
PCD	Trapesina	dome lava	NIS286a	core	m	Older PCD system	51.22	0.54	2.69	0	2.28	6.92	0.33		15.84	19.22	0.31	0.05	99.41		1.907	0.093	0	0		0.879	0.215	0.064	0.024	0.015	0		0.01	0.767	0.023	0.003		14.9762	39.6112	45.4126	1.86	0.05		0.015	0.017	0.046	0	0	0.006
PCD	Trapesina	dome lava	NIS286a	core	m	Older PCD system	48.94	1.05	5.67	0.14	2.92	2.93	0.09		14.94	22.27	0.27	0.01	99.23		1.814	0.186	0	0		0.826	0.091	0.081	0.062	0.029	0.004		0.003	0.884	0.019	0.001		9.28874	46.9152	43.796	1.8	0.04		0.029	0.055	0.072	0	0.004	0.007
PCD	Trapesina	dome lava	NIS286a	rim	m	Older PCD system	50.19	0.6	3.87	0.01	2.27	6.05	0.22		14.95	20.44	0.29	0.03	98.92		1.877	0.123	0	0		0.834	0.189	0.064	0.048	0.017	0		0.007	0.819	0.021	0.001		13.6095	42.8092	43.5813	1.84	0.04		0.017	0.038	0.051	0	0	0.009
PCD	Trapesina	dome lava	NIS286a	core	m	Older PCD system	49.66	0.71	5.12	0.03	2.56	4.18	0.14		15.33	20.98	0.31	0.01	99.03		1.844	0.156	0	0		0.848	0.13	0.072	0.068	0.02	0.001		0.005	0.835	0.023	0.001		10.896	44.1915	44.9125	1.81	0.05		0.02	0.057	0.06	0	0.001	0.011
PCD	Trapesina	dome lava	NIS286a	core	m	Older PCD system	49.34	0.95	5.94	0.04	2.6	4.06	0.14		15.67	20.63	0.28	0	99.66		1.818	0.182	0	0		0.861	0.125	0.072	0.076	0.026	0.001		0.004	0.814	0.02	0		10.7483	43.3859	45.8658	1.8	0.04		0.026	0.066	0.063	0	0.001	0.01
PCD	Trapesina	dome lava	NIS286a	core	m	Older PCD system	50	0.71	5.36	0.04	2.62	3.92	0.15		15.62	21.14	0.3	0.01	99.87		1.838	0.162	0	0		0.856	0.121	0.072	0.071	0.02	0.001		0.005	0.833	0.021	0		10.4759	44.1418	45.3822	1.81	0.04		0.02	0.06	0.062	0	0.001	0.01
PCD	Trapesina	dome lava	NIS286a	core	m	Older PCD system	48.64	1.06	6.33	0.09	3.54	3.16	0.12		15.29	21.22	0.29	0.01	99.76		1.793	0.207	0	0		0.841	0.098	0.098	0.068	0.029	0.003		0.004	0.838	0.021	0.001		10.6267	44.6267	44.7467	1.78	0.04		0.029	0.061	0.087	0	0.003	0.007
PCD	Trapesina	dome lava	NIS286a	core	m	Older PCD system	49.11	0.96	5.72	0	3.03	4.85	0.16		14.5	21.34	0.3	0.01	99.98		1.817	0.183	0	0		0.8	0.15	0.084	0.066	0.027	0		0.005	0.846	0.021	0		12.6919	44.8763	42.4318	1.8	0.04		0.027	0.057	0.072	0	0	0.009
PCD	Trapesina	dome lava	NIS286a	rim	m	Older PCD system	52.47	0.37	2.44	0	0.93	5.66	0.19		17.85	19.13	0.18	0.02	99.24		1.931	0.069	0	0		0.979	0.174	0.026	0.037	0.01	0		0.006	0.754	0.013	0.001		10.6219	38.8948	50.4832	1.91	0.03		0.01	0.029	0.02	0	0	0.008
PCD	Trapesina	dome lava	NIS286a	rim	m	Older PCD system	50.14	0.69	4.03	0.01	3.31	5.44	0.25		16.36	19.16	0.24	0.01	99.65		1.856	0.144	0	0		0.903	0.168	0.092	0.032	0.019	0		0.008	0.76	0.018	0.001		13.8988	39.3564	46.7448	1.83	0.04		0.019	0.027	0.079	0	0	0.004
PCD	Trapesina	Enclave	NIS278b	core	m	Older PCD system	48.99	1.26	6.67	0	2.74	4.53	0.17		14.62	21.76	0.23	0	100.97		1.792	0.208	0	0		0.797	0.139	0.075	0.08	0.035	0		0.005	0.853	0.016	0		11.7362	45.618	42.6458	1.79	0.03		0.035	0.071	0.067	0	0	0.008
PCD	Trapesina	Enclave	NIS278b	rim	m	Older PCD system	47.87	1.66	7.7	0	3.67	3.55	0.13		13.82	22.55	0.33	0	101.28		1.75	0.25	0	0		0.753	0.108	0.101	0.081	0.046	0		0.004	0.883	0.023	0		11.5385	47.7464	40.715	1.74	0.05		0.046	0.071	0.088	0	0	0.01
PCD	Trapesina	Enclave	NIS278b	core	m	Older PCD system	53.66	0.2	1.41	0.06	0.48	6.38	0.33		18.1	18.75	0.23	0.09	99.69		1.967	0.033	0	0		0.989	0.196	0.013	0.028	0.006	0.002		0.01	0.736	0.016	0.004		11.263	37.8706	50.8664	1.92	0.03		0.006	0.015	0.007	0	0.002	0.01
PCD	Trapesina	Enclave	NIS278b	core	m	Older PCD system	47.21	1.43	7.33	0.06	4.68	2.39	0.23		14.85	21.34	0.28	0	99.81		1.745	0.255	0	0		0.818	0.074	0.13	0.064	0.04	0.002		0.007	0.845	0.02	0		11.2818	45.0748	43.6433	1.74	0.04		0.04	0.058	0.118	0	0.002	0.006
PCD	Trapesina	Enclave	NIS278b	core	gdm	Older PCD system	46.41	2.98	8.66	0	9.31	1.7	0.3		16.26	11.53	2.23	0.68	100.06		1.698	0.302	0	0		0.887	0.052	0.256	0.071	0.082	0		0.009	0.452	0.158	0.032		19.1794	27.284	53.5366	1.39	0.32		0.082	0.03	0.108	0	0	0.034
PCD	Trapesina	Enclave	NIS278b	core	m	Older PCD system	50.83	0.77	4.07	0.06	2.7	4.06	0.12		16.59	20.68	0.25	0.02	100.15		1.862	0.138	0	0		0.906	0.124	0.074	0.038	0.021	0.002		0.004	0.812	0.018	0.001		10.5482	42.2697	47.1821	1.84	0.04		0.021	0.032	0.063	0	0.002	0.005
PCD	Trapesina	Enclave	NIS278b	core	ph	Older PCD system	52.28	0.33	2.13	0.01	3.06	4.66	0.36		15.59	22.47	0.26	0	101.16		1.912	0.088	0	0		0.85	0.143	0.084	0.004	0.009	0		0.011	0.88	0.018	0		12.0949	44.7269	43.1782	1.87	0.04		0.009	0.003	0.067	0	0	0.001
PCD	Trapesina	Enclave	NIS278b	core	m	Older PCD system	51	0.62	5.18	0.15	2.93	2.86	0.17		15.84	22.25	0.38	0	101.38		1.844	0.156	0	0		0.854	0.087	0.08	0.065	0.017	0.004		0.005	0.862	0.027	0		9.08794	45.6718	45.2403	1.8	0.05		0.017	0.055	0.067	0	0.004	0.01
PCD	Trapesina	Enclave	NIS278b	core	m	Older PCD system	51.72	0.58	2.72	0.07	4.01	3.18	0.16		16.26	22.07	0.34	0.06	101.17		1.883	0.117	0	0		0.883	0.097	0.11	0	0.016	0.002		0.005	0.861	0.024	0.003		10.8267	44.0338	45.1395	1.84	0.05		0.016	0	0.085	0	0.002	0
PCD	Trapesina	Enclave	NIS278b	core	mph	Older PCD system	52.49	0.61	2.7	0	0.77	5.75	0.23		15.84	21.7	0.28	0	100.37		1.924	0.076	0	0		0.866	0.176	0.021	0.041	0.017	0		0.007	0.852	0.02	0		10.6409	44.3325	45.0266	1.89	0.04		0.017	0.028	0.014	0	0	0.013
PCD	Trapesina	Enclave	NIS278b	core	m	Older PCD system	51.93	0.65	3.36	0.08	3.22	4.1	0.21		16.59	21.57	0.25	0	101.96		1.875	0.125	0	0		0.893	0.124	0.088	0.018	0.018	0.002		0.006	0.834	0.017	0		11.1962	42.8971	45.9067	1.85	0.03		0.018	0.015	0.075	0	0.002	0.003
PCD	Trapesina	Enclave	NIS278b	core	m	Older PCD system	48.72	1.24	6.52	0.02	2.85	4.35	0.09		14.64	21.24	0.35	0	100.02		1.797	0.203	0	0		0.805	0.134	0.079	0.08	0.034	0.001		0.003	0.839	0.025	0		11.6086	45.1197	43.2718	1.78	0.05		0.034	0.068	0.067	0	0.001	0.012
PCD	Trapesina	Enclave	NIS278a	core	m	Older PCD system	51.96	0.43	3.19	0	3.62	3.78	0.21		18.61	18.59	0.33	0	100.72		1.882	0.118	0	0		1.005	0.115	0.099	0.019	0.012	0		0.006	0.722	0.023	0		11.2894	37.0725	51.6382	1.84	0.05		0.012	0.015	0.079	0	0	0.004
PCD	Trapesina	Enclave	NIS278a	core	m	Older PCD system	50.98	0.7	5.72	0.07	2.45	3.99	0.16		15.57	21.79	0.38	0	101.82		1.838	0.162	0	0		0.837	0.12	0.067	0.082	0.019	0.002		0.005	0.842	0.027	0		10.2558	45.0021	44.7421	1.8	0.05		0.019	0.068	0.056	0	0.002	0.014
PCD	Trapesina	Enclave	NIS278a	core	m	Older PCD system	53.32	0.33	2.36	0	1.03	4.89	0.21		18.73	19.29	0.17	0.02	100.35		1.933	0.067	0	0		1.012	0.148	0.028	0.034	0.009	0		0.006	0.749	0.012	0.001		9.40633	38.534	52.0597	1.91	0.02		0.009	0.027	0.022	0	0	0.007
PCD	Trapesina	Enclave	NIS278a	core	m	Older PCD system	49.18	0.89	4.92	0.01	3.46	4.48	0.18		15.52	20.3	0.27	0	99.21		1.829	0.171	0	0		0.86	0.139	0.097	0.044	0.025	0		0.006	0.809	0.02	0		12.6574	42.325	45.0176	1.81	0.04		0.025	0.038	0.083	0	0	0.006
PCD	Trapesina	Enclave	NIS278a	core	mph	Older PCD system	52.96	0.22	1.21	0.06	0.39	8.62	0.52		14.39	20.77	0.43	0.04	99.62		1.977	0.023	0	0		0.801	0.269	0.011	0.03	0.006	0.002		0.016	0.831	0.031	0.002		15.3871	43.0825	41.5304	1.9	0.06		0.006	0.008	0.003	0	0.002	0.021
PCD	Trapesina	Enclave	NIS278a	rim	mph	Older PCD system	49.59	0.89	4.49	0	3.38	4.34	0.17		15.42	21.02	0.25	0.01	99.55		1.839	0.161	0	0		0.852	0.134	0.094	0.035	0.025	0		0.005	0.835	0.018	0		12.1759	43.4631	44.3611	1.82	0.04		0.025	0.03	0.081	0	0	0.005
PCD	Trapesina	Enclave	NIS278a	core	mph	Older PCD system	52.58	0.34	1.77	0.01	2.44	4.87	0.26		19.07	18.15	0.17	0	99.66		1.925	0.075	0	0		1.041	0.149	0.067	0.001	0.009	0		0.008	0.712	0.012	0		11.3367	36.0173	52.646	1.9	0.02		0.009	0.001	0.055	0	0	0
PCD	Trapesina	Enclave	NIS278a	rim	mph	Older PCD system	49.55	0.89	3.96	0.02	3.23	5.31	0.21		15.04	20.13	0.4	0.03	98.78		1.857	0.143	0	0		0.84	0.166	0.091	0.032	0.025	0.001		0.007	0.808	0.029	0.001		13.8127	42.2564	43.9309	1.81	0.06		0.025	0.024	0.069	0	0.001	0.007
PCD	Trapesina	Enclave	NIS278a	core	mph	Older PCD system	52.62	0.34	2.27	0.01	1.93	3.75	0.15		18.29	20.15	0.2	0	99.72		1.922	0.078	0	0		0.996	0.115	0.053	0.02	0.009	0		0.005	0.788	0.014	0		8.81041	40.2908	50.8987	1.9	0.03		0.009	0.016	0.043	0	0	0.004
PCD	Trapesina	Enclave	NIS278a	inner rim	mph	Older PCD system	49.85	0.8	5.32	0.18	2.97	2.71	0.12		15.86	21.78	0.28	0.01	99.86		1.83	0.17	0	0		0.868	0.083	0.082	0.059	0.022	0.005		0.004	0.857	0.02	0		8.91245	45.2474	45.8402	1.81	0.04		0.022	0.053	0.073	0	0.005	0.006
PCD	Trapesina	Enclave	NIS278a	rim	mph	Older PCD system	49.28	0.94	4.55	0	3.5	5.25	0.19		14.85	20.66	0.3	0	99.54		1.835	0.165	0	0		0.824	0.163	0.098	0.035	0.026	0		0.006	0.824	0.022	0		13.9624	43.0199	43.0177	1.81	0.04		0.026	0.03	0.082	0	0	0.006
PCD	Trapesina	Enclave	NIS278a	core	mph	Older PCD system	52.78	0.34	2.13	0.02	1.52	5.23	0.21		19.02	18.12	0.18	0	99.55		1.93	0.07	0	0		1.037	0.16	0.042	0.022	0.009	0.001		0.006	0.71	0.013	0		10.6535	36.3167	53.0298	1.91	0.03		0.009	0.018	0.034	0	0.001	0.004
PCD	Trapesina	Enclave	NIS278a	rim	mph	Older PCD system	48.86	1.02	5.74	0.02	3.11	4.37	0.15		14.92	20.96	0.29	0	99.45		1.813	0.187	0	0		0.826	0.136	0.087	0.064	0.028	0.001		0.005	0.833	0.021	0		12.0403	44.1883	43.7714	1.79	0.04		0.028	0.055	0.075	0	0.001	0.009
PCD	Trapesina	Enclave	NIS278a	core	m	Older PCD system	47.9	1.3	6.76	0	3.95	3.77	0.08		15.56	19.84	0.31	0	99.48		1.772	0.228	0	0		0.858	0.117	0.11	0.067	0.036	0		0.003	0.787	0.022	0		12.2362	41.9674	45.7964	1.76	0.04		0.036	0.059	0.096	0	0	0.008
PCD	Trapesina	Enclave	NIS266c	rim	m	Older PCD system	53.03	0.31	2.49	0	0.73	4.93	0.23		17.59	20.99	0.06	0	100.36		1.93	0.07	0	0		0.954	0.15	0.02	0.037	0.008	0		0.007	0.819	0.004	0		9.08836	41.9718	48.9399	1.92	0.01		0.008	0.034	0.019	0	0	0.003
PCD	Trapesina	Enclave	NIS283	core	m	Older PCD system	50.44	0.7	4.62	0.07	3.29	2.95	0.06		16	21.99	0.24	0.04	100.4		1.844	0.156	0	0		0.872	0.09	0.09	0.044	0.019	0.002		0.002	0.862	0.017	0.002		9.52807	44.9575	45.5144	1.82	0.03		0.019	0.038	0.079	0	0.002	0.005
PCD	Trapesina	Enclave	NIS283	core	m	Older PCD system	53.05	0.21	1.65	0	3.41	3.26	0.16		18.63	20.42	0.16	0.03	100.98		1.919	0.07	0.006	0.005		1.005	0.099	0.088	0	0	0		0.005	0.791	0.011	0.001		9.63003	39.8205	50.5494	1.89	0.02		0	0	0.075	0	0	0
PCD	Trapesina	Enclave	NIS283	core	m	Older PCD system	48.21	1.24	7.15	0.01	2.59	4.39	0.15		14.37	21.2	0.31	0	99.62		1.784	0.216	0	0		0.793	0.136	0.072	0.096	0.035	0		0.005	0.841	0.022	0		11.5161	45.5341	42.9498	1.77	0.04		0.035	0.084	0.063	0	0	0.012
PCD	Trapesina	Enclave	NIS283	core	m	Older PCD system	53.01	0.23	0.86	0	0.86	8.25	0.63		14.42	21.39	0.34	0	100		1.975	0.025	0	0		0.801	0.257	0.024	0.013	0.006	0		0.02	0.854	0.025	0		15.4019	43.6496	40.9485	1.91	0.05		0.006	0.004	0.008	0	0	0.009
PCD	Sterna	dome lava	NIS299b	core	gdm	Older PCD system	49.37	1	6.23	0.1	2.13	3.97	0.21		15.15	21.53	0.25	0	99.95		1.815	0.185	0	0		0.83	0.122	0.059	0.085	0.028	0.003		0.007	0.848	0.018	0		10.059	45.4458	44.4953	1.8	0.04		0.028	0.076	0.053	0	0.003	0.009
PCD	Sterna	dome lava	NIS299b	core	m	Older PCD system	53.41	0.36	2.21	0	2.02	4.08	0.13		19.02	19.63	0.2	0	101.07		1.923	0.077	0	0		1.021	0.123	0.055	0.017	0.01	0		0.004	0.757	0.014	0		9.2699	38.6388	52.0913	1.9	0.03		0.01	0.013	0.044	0	0	0.003
PCD	Sterna	Enclave	NIS299b	core	mph	Older PCD system	50.06	0.91	5.56	0	1.89	4.52	0.09		15.58	21.33	0.2	0.01	100.15		1.836	0.164	0	0		0.852	0.139	0.052	0.076	0.025	0		0.003	0.838	0.014	0		10.2882	44.4929	45.2189	1.83	0.03		0.025	0.068	0.046	0	0	0.008
PCD	Sterna	Enclave	NIS299b	core	ph	Older PCD system	52.28	0.37	1.73	0	2.56	6.63	0.46		15.15	20.91	0.4	0.03	100.52		1.931	0.069	0	0		0.834	0.205	0.071	0.007	0.01	0		0.014	0.828	0.029	0.001		14.8824	42.3868	42.7308	1.87	0.06		0.01	0.004	0.044	0	0	0.002
PCD	Sterna	Enclave	NIS299b	rim	ph	Older PCD system	49.16	1.02	6.37	0	3.43	2.89	0.17		15.48	21.58	0.3	0	100.4		1.798	0.202	0	0		0.844	0.088	0.094	0.073	0.028	0		0.005	0.846	0.021	0		10.0208	45.0325	44.9467	1.78	0.04		0.028	0.063	0.082	0	0	0.009
PCD	Nifios	dome lava	NIS288	core	gdm	Younger PCD system	52.09	0.14	3.68	0	0.62	9.19	0.39		15.85	17.32	0.35	0.25	99.88		1.926	0.074	0	0		0.874	0.284	0.017	0.086	0.004	0		0.012	0.686	0.025	0.012		16.744	36.6233	46.6327	1.84	0.05		0.004	0.055	0.011	0	0	0.021
PCD	Nifios	dome lava	NIS288	core	m	Younger PCD system	53.66	0.05	1.85	0.04	1.45	6.38	0.19		18.84	18.16	0.17	0	100.78		1.945	0.055	0	0		1.018	0.193	0.039	0.024	0.001	0.001		0.006	0.705	0.012	0		12.1634	35.947	51.8896	1.92	0.02		0.001	0.02	0.033	0	0.001	0.004
PCD	Nifios	dome lava	NIS288	core	mph	Younger PCD system	47.95	0.29	7.26	0.06	5.09	3.97	0.16		13.99	21.22	0.29	0	100.28		1.772	0.228	0	0		0.771	0.123	0.142	0.089	0.008	0.002		0.005	0.84	0.021	0		14.3204	44.687	40.9926	1.73	0.04		0.008	0.081	0.13	0	0.002	0.007
PCD	Nifios	dome lava	NIS288	core	mph	Younger PCD system	53.8	0	1.67	0	2.15	7.16	0.27		20.12	15.66	0.17	0.06	101.06		1.943	0.057	0	0		1.083	0.216	0.058	0.014	0	0		0.008	0.606	0.012	0.003		14.3408	30.7278	54.9313	1.91	0.02		0	0.011	0.046	0	0	0.002
PCD	Karaviotis	dome lava	NIS264b	core	mph	Younger PCD system	49.22	1	6.47	0.05	2.66	4.07	0.19		15.32	20.66	0.37	0	100.01		1.808	0.192	0	0		0.839	0.125	0.073	0.088	0.028	0.001		0.006	0.813	0.026	0		11.0084	43.8002	45.1915	1.78	0.05		0.028	0.075	0.062	0	0.001	0.014
PCD	Karaviotis	dome lava	NIS264b	rim	mph	Younger PCD system	49.37	0.9	5.74	0.04	2.53	3.83	0.15		15.96	20.55	0.22	0.02	99.31		1.823	0.177	0	0		0.878	0.118	0.07	0.073	0.025	0.001		0.005	0.813	0.016	0.001		10.2587	43.132	46.6093	1.81	0.03		0.025	0.065	0.063	0	0.001	0.007
PCD	Karaviotis	dome lava	NIS264b	core	gdm	Younger PCD system	48.84	1.33	6.77	0	3.29	3.93	0.17		14.8	21.49	0.34	0	100.96		1.785	0.215	0	0		0.806	0.12	0.09	0.076	0.037	0		0.005	0.841	0.024	0		11.5818	45.1517	43.2665	1.77	0.05		0.037	0.065	0.077	0	0	0.011
PCD	Karaviotis	dome lava	NIS264b	rim	gdm	Younger PCD system	50.15	0.78	5.19	0	3.14	3.87	0.17		15.6	21.36	0.3	0.02	100.59		1.834	0.166	0	0		0.851	0.118	0.087	0.058	0.021	0		0.005	0.837	0.021	0.001		11.0759	44.105	44.8191	1.81	0.04		0.021	0.049	0.073	0	0	0.009
PCD	Karaviotis	dome lava	NIS264b	core	m	Younger PCD system	53.65	0.16	1.01	0.02	0.4	8.28	0.55		16.06	20.3	0.17	0.01	100.61		1.974	0.026	0	0		0.881	0.255	0.011	0.018	0.004	0.001		0.017	0.8	0.012	0		14.408	40.7429	44.8491	1.94	0.02		0.004	0.011	0.006	0	0.001	0.007
PCD	Karaviotis	dome lava	NIS264b	core	m	Younger PCD system	49.63	0.98	5.69	0.08	3.45	2.73	0.11		15.31	22.04	0.38	0.03	100.43		1.816	0.184	0	0		0.835	0.084	0.095	0.061	0.027	0.002		0.003	0.864	0.027	0.001		9.67369	45.9318	44.3945	1.78	0.05		0.027	0.051	0.079	0	0.002	0.01
PCD	Karaviotis	dome lava	NIS264b	core	m	Younger PCD system	48.71	0.5	5.77	0	5.85	3.02	0.27		15.37	19.24	0.69	0.05	99.47		1.804	0.196	0	0		0.849	0.094	0.163	0.056	0.014	0		0.008	0.764	0.05	0.002		14.126	40.6691	45.2049	1.71	0.1		0.014	0.043	0.125	0	0	0.013
PCD	Karaviotis	dome lava	NIS264b	core	gm	Younger PCD system	50.91	0.48	2.11	0.01	4.75	4.82	0.44		15.25	20.95	0.39	0.07	100.18		1.89	0.092	0.013	0.005		0.844	0.149	0.128	0	0	0		0.014	0.833	0.028	0.003		14.8027	42.327	42.8702	1.83	0.06		0	0	0.097	0	0	0
PCD	Karaviotis	dome lava	NIS277c	core	mph	Younger PCD system	52.87	0.38	2.17	0.05	1.02	5.1	0.17		18.45	19.18	0.18	0	99.56		1.934	0.066	0	0		1.007	0.156	0.028	0.028	0.01	0.001		0.005	0.752	0.012	0		9.72279	38.5997	51.6775	1.91	0.02		0.01	0.022	0.022	0	0.001	0.005
PCD	Karaviotis	dome lava	NIS277c	rim	mph	Younger PCD system	49.88	0.77	3.98	0.01	2.75	5.92	0.24		15.32	19.95	0.27	0.02	99.12		1.862	0.138	0	0		0.853	0.185	0.077	0.037	0.022	0		0.008	0.798	0.019	0.001		14.0404	41.5509	44.4087	1.84	0.04		0.022	0.031	0.064	0	0	0.006
PCD	Karaviotis	dome lava	NIS277c	core	mph	Younger PCD system	52.77	0.32	2.08	0	1.79	5.29	0.2		18.65	18.63	0.16	0.01	99.91		1.928	0.072	0	0		1.016	0.161	0.049	0.017	0.009	0		0.006	0.729	0.012	0		11.0551	37.1716	51.7733	1.91	0.02		0.009	0.014	0.04	0	0	0.003
PCD	Karaviotis	dome lava	NIS277c	rim	mph	Younger PCD system	52.09	0.36	1.56	0	1.7	6.65	0.39		14.91	21.38	0.33	0.03	99.4		1.944	0.056	0	0		0.83	0.208	0.048	0.013	0.01	0		0.012	0.855	0.024	0.001		13.7118	43.7926	42.4955	1.89	0.05		0.01	0.007	0.028	0	0	0.005
PCD	Karaviotis	dome lava	NIS277c	core	mph	Younger PCD system	50.01	0.78	4.95	0.08	2.97	3.05	0.12		16	21.49	0.27	0.01	99.72		1.839	0.161	0	0		0.877	0.094	0.082	0.053	0.022	0.002		0.004	0.847	0.019	0		9.43734	44.4781	46.0846	1.82	0.04		0.022	0.046	0.072	0	0.002	0.007
PCD	Karaviotis	dome lava	NIS277c	rim	mph	Younger PCD system	49.28	1.01	4.88	0	3.5	5.97	0.24		15.42	19.2	0.32	0.02	99.85		1.828	0.172	0	0		0.853	0.185	0.098	0.041	0.028	0		0.008	0.763	0.023	0.001		15.2415	40.0285	44.73	1.8	0.05		0.028	0.034	0.081	0	0	0.007
PCD	Karaviotis	dome lava	NIS277c	core	m	Younger PCD system	51.36	0.48	2.08	0	1.75	7.43	0.36		15.34	19.72	0.28	0.04	98.84		1.927	0.073	0	0		0.858	0.233	0.049	0.019	0.013	0		0.011	0.793	0.021	0.002		15.1166	40.7568	44.1265	1.88	0.04		0.013	0.013	0.033	0	0	0.006
PCD	Karaviotis	dome lava	NIS277c	core	m	Younger PCD system	49.38	1.02	5.36	0.02	2.51	4.62	0.14		15.01	21.27	0.25	0.01	99.59		1.829	0.171	0	0		0.829	0.143	0.07	0.063	0.028	0		0.004	0.844	0.018	0.001		11.5052	44.6474	43.8474	1.82	0.04		0.028	0.054	0.06	0	0	0.008
PCD	Karaviotis	dome lava	NIS277c	core	m	Younger PCD system	51.17	0.47	1.74	0.01	3.13	6.01	0.29		17.56	17.74	0.26	0.03	98.4		1.914	0.077	0.009	0		0.979	0.188	0.088	0	0.004	0		0.009	0.711	0.019	0.001		14.4285	35.9896	49.5819	1.88	0.04		0.004	0	0.069	0	0	0
PCD	Karaviotis	dome lava	NIS277c	core	m	Younger PCD system	48.23	1	5.59	0.02	4.34	3.8	0.15		15.37	20.16	0.29	0.02	98.97		1.799	0.201	0	0		0.855	0.119	0.122	0.044	0.028	0.001		0.005	0.806	0.021	0.001		12.8661	42.2847	44.8492	1.78	0.04		0.028	0.039	0.106	0	0.001	0.005
PCD	Karaviotis	Enclave	NIS264b	core	mph	Younger PCD system	51.1	0.4	2.03	0.12	4.48	1.81	0.22		17.65	21.12	0.19	0.01	99.14		1.888	0.088	0.011	0.013		0.972	0.056	0.112	0	0	0.004		0.007	0.836	0.014	0		8.80956	42.1633	49.0272	1.86	0.03		0	0	0.101	0	0.004	0
PCD	Karaviotis	Enclave	NIS264b	rim	mph	Younger PCD system	47.15	1.25	6.51	0.05	7.98	0.37	0.28		15.14	21.46	0.51	0	100.7		1.732	0.268	0	0		0.829	0.011	0.221	0.014	0.035	0.001		0.009	0.845	0.036	0		12.5704	44.12	43.3096	1.68	0.07		0.035	0.012	0.188	0	0.001	0.002
PCD	Karaviotis	Enclave	NIS267b	core	ph	Younger PCD system	52.83	0.26	1.07	0.01	1.05	5.94	0.4		15.58	21.81	0.29	0	99.24		1.965	0.035	0	0		0.864	0.185	0.029	0.012	0.007	0		0.013	0.869	0.021	0		11.5739	44.3476	44.0785	1.92	0.04		0.007	0.006	0.015	0	0	0.006
PCD	Karaviotis	Enclave	NIS267b	rim	ph	Younger PCD system	51.28	0.55	3.86	0.08	1.35	3.95	0.17		16.6	21.16	0.18	0.05	99.22		1.889	0.111	0	0		0.912	0.122	0.037	0.056	0.015	0.002		0.005	0.835	0.013	0.002		8.60093	43.6971	47.702	1.87	0.03		0.015	0.049	0.032	0	0.002	0.006
PCD	Karaviotis	Enclave	NIS267b	core	mph	Younger PCD system	53.28	0.26	1.72	0.03	0.8	5.2	0.17		18.51	19.24	0.2	0	99.41		1.951	0.049	0	0		1.011	0.159	0.022	0.026	0.007	0.001		0.005	0.755	0.014	0		9.56209	38.6704	51.7675	1.92	0.03		0.007	0.018	0.016	0	0.001	0.007
PCD	Karaviotis	Enclave	NIS267b	rim	mph	Younger PCD system	49.51	1.07	5.53	0	2.87	3.99	0.21		15.23	21.45	0.28	0.01	100.15		1.821	0.179	0	0		0.835	0.123	0.08	0.061	0.03	0		0.007	0.845	0.02	0		11.051	44.7458	44.2032	1.8	0.04		0.03	0.052	0.068	0	0	0.009
PCD	Karaviotis	Enclave	NIS267b	core	m	Younger PCD system	52.05	0.4	2.53	0.02	2.51	3.06	0.15		18.46	19.83	0.21	0.03	99.26		1.908	0.092	0	0		1.009	0.094	0.069	0.017	0.011	0.001		0.005	0.779	0.015	0.001		8.58387	39.8331	51.583	1.88	0.03		0.011	0.014	0.057	0	0.001	0.003
PCD	Karaviotis	Enclave	NIS267b	rim	m	Younger PCD system	50.37	0.84	5.08	0.05	1.99	4.38	0.24		16.64	20.12	0.2	0	99.9		1.846	0.154	0	0		0.909	0.134	0.055	0.066	0.023	0.001		0.007	0.79	0.014	0		10.3597	41.6767	47.9636	1.83	0.03		0.023	0.059	0.049	0	0.001	0.007
PCD	Karaviotis	Enclave	NIS267b	core	m	Younger PCD system	51.06	0.47	2.85	0	3.58	3.1	0.17		16.54	21.19	0.34	0	99.3		1.887	0.113	0	0		0.911	0.096	0.1	0.011	0.013	0		0.005	0.839	0.024	0		10.292	42.9997	46.7083	1.85	0.05		0.013	0.009	0.078	0	0	0.002
PCD	Karaviotis	Enclave	NIS267b	core	m	Younger PCD system	52.45	0.39	2.06	0	1.57	5	0.18		18.16	19.23	0.19	0	99.23		1.93	0.07	0	0		0.996	0.154	0.043	0.019	0.011	0		0.006	0.758	0.013	0		10.3686	38.7454	50.886	1.91	0.03		0.011	0.015	0.034	0	0	0.004
PCD	Karaviotis	Enclave	NIS267b	rim	m	Younger PCD system	52.46	0.3	2.08	0	1.58	5.24	0.25		18.92	17.96	0.16	0.01	98.96		1.931	0.069	0	0		1.038	0.161	0.044	0.021	0.008	0		0.008	0.708	0.011	0		10.8649	36.1525	52.9825	1.91	0.02		0.008	0.017	0.036	0	0	0.004
PCD	Karaviotis	Enclave	NIS267b	rim	m	Younger PCD system	50.93	0.55	3.64	0.01	2.59	4.32	0.19		16.81	20.01	0.26	0.03	99.34		1.879	0.121	0	0		0.925	0.133	0.072	0.038	0.015	0		0.006	0.791	0.018	0.001		10.9631	41.0422	47.9947	1.85	0.04		0.015	0.031	0.059	0	0	0.006
PCD	Karaviotis	Enclave	NIS267b	core	m	Younger PCD system	52.35	0.4	2.35	0.02	1.61	4.94	0.19		18.16	19.25	0.17	0	99.45		1.922	0.078	0	0		0.994	0.152	0.044	0.023	0.011	0		0.006	0.757	0.012	0		10.3564	38.7605	50.8832	1.9	0.02		0.011	0.019	0.037	0	0	0.004
PCD	Karaviotis	Enclave	NIS267b	rim	m	Younger PCD system	47.84	1.19	6.58	0.02	3.68	4.03	0.15		14.72	20.7	0.28	0.01	99.22		1.781	0.219	0	0		0.817	0.125	0.103	0.07	0.033	0.001		0.005	0.825	0.02	0.001		12.4346	44.014	43.5514	1.77	0.04		0.033	0.061	0.091	0	0.001	0.008
PCD	Karaviotis	Enclave	NIS267b	core	m	Younger PCD system	46.51	1.54	7.72	0.02	4.11	3.16	0.14		13.71	21.47	0.38	0.01	98.76		1.742	0.258	0	0		0.765	0.099	0.116	0.083	0.043	0.001		0.004	0.861	0.027	0		11.8756	46.667	41.4573	1.73	0.05		0.043	0.072	0.1	0	0.001	0.011
PCD	Karaviotis	Enclave	NIS267b	rim	m	Younger PCD system	50.52	0.54	2.69	0	2.7	6.31	0.4		15.63	19.47	0.28	0.01	98.58		1.898	0.102	0	0		0.875	0.198	0.076	0.017	0.015	0		0.013	0.784	0.021	0.001		14.7699	40.2592	44.9709	1.86	0.04		0.015	0.013	0.059	0	0	0.004
PCD	Karaviotis	Enclave	NIS267b	core	m	Younger PCD system	47.98	1.24	6.95	0.04	3.07	3.68	0.15		14.61	21.2	0.31	0.01	99.23		1.781	0.219	0	0		0.808	0.114	0.086	0.085	0.034	0.001		0.005	0.843	0.022	0.001		11.0232	45.4278	43.549	1.77	0.04		0.034	0.075	0.075	0	0.001	0.01
PCD	Boriatico	dome lava	NIS304b	core	m	Younger PCD system	48.53	1.47	7.1	0	3.51	3.52	0.14		14.37	22.35	0.31	0	101.3		1.77	0.23	0	0		0.781	0.107	0.096	0.075	0.04	0		0.004	0.873	0.022	0		11.1701	46.8857	41.9442	1.76	0.04		0.04	0.065	0.084	0	0	0.01
PCD	Boriatico	dome lava	NIS304b	core	gdm	Younger PCD system	51.9	0.76	0.92	0.03	1.75	9.16	0.32		16.47	16.97	0.36	0.16	98.81		1.95	0.041	0.009	0		0.922	0.288	0.05	0	0.012	0.001		0.01	0.683	0.026	0.008		17.798	34.9735	47.2284	1.89	0.05		0.012	0	0.017	0	0.001	0
PCD	Boriatico	dome lava	NIS304b	core	gdm	Younger PCD system	49.75	0.15	6.2	0.22	3.06	3.18	0.06		15.1	22.17	0.21	0.03	100.13		1.825	0.175	0	0		0.826	0.097	0.084	0.093	0.004	0.006		0.002	0.871	0.015	0.001		9.77107	46.3263	43.9027	1.79	0.03		0.004	0.087	0.08	0	0.006	0.004
PCD	Boriatico	dome lava	NIS304b	core	m	Younger PCD system	52.57	0.04	1.85	0	2.53	6.4	0.24		18.4	17.9	0.08	0.05	100.05		1.928	0.072	0	0		1.006	0.196	0.07	0.008	0.001	0		0.007	0.703	0.006	0.002		13.7876	35.4745	50.7379	1.91	0.01		0.001	0.007	0.062	0	0	0.001
PCD	Boriatico	dome lava	NIS304b	core	mph	Younger PCD system	50.7	0.15	3.99	0	2.9	3.27	0.03		15.57	22.17	0.28	0	99.06		1.878	0.122	0	0		0.86	0.101	0.081	0.053	0.004	0		0.001	0.88	0.02	0		9.52232	45.7609	44.7167	1.84	0.04		0.004	0.045	0.069	0	0	0.008
PCD	Boriatico	dome lava	NIS304b	core	mph	Younger PCD system	53.39	0.01	1.16	0.03	1.67	8.36	0.44		13.73	22.23	0.43	0.03	101.49		1.967	0.033	0	0		0.754	0.258	0.046	0.017	0	0.001		0.014	0.877	0.031	0.001		16.3039	45.013	38.6831	1.89	0.06		0	0.009	0.024	0	0.001	0.008
PCD	Boriatico	dome lava	NIS304b	rim	mph	Younger PCD system	49.77	0.25	6.4	0.14	2.81	4.28	0.09		15.07	21.68	0.15	0.01	100.65		1.82	0.18	0	0		0.822	0.131	0.077	0.096	0.007	0.004		0.003	0.849	0.011	0		11.214	45.1337	43.6523	1.8	0.02		0.007	0.092	0.074	0	0.004	0.004
PCD	Boriatico	dome lava	NIS324	core	m	Younger PCD system	53.15	0.08	0.58	0	0.75	9.61	0.54		14.37	20.98	0.21	0.01	100.26		1.982	0.018	0	0		0.799	0.3	0.021	0.007	0.002	0		0.017	0.839	0.015	0		17.0952	42.4576	40.4472	1.94	0.03		0.002	0.003	0.01	0	0	0.004
PCD	Boriatico	dome lava	NIS324	core	m	Younger PCD system	52.36	0.43	1.29	0	3.12	5.76	0.23		17.58	18.63	0.27	0.18	99.86		1.931	0.056	0.012	0.001		0.966	0.177	0.085	0	0	0		0.007	0.736	0.019	0.009		13.6881	37.3145	48.9974	1.88	0.04		0	0	0.057	0	0	0
PCD	Boriatico	Enclave	NIS304b	core	m	Younger PCD system	48.72	1.16	6.55	0.09	3.35	3.84	0.19		14.4	22.08	0.27	0.02	100.67		1.789	0.211	0	0		0.788	0.118	0.092	0.072	0.032	0.003		0.006	0.869	0.019	0.001		11.545	46.3738	42.0812	1.77	0.04		0.032	0.065	0.083	0	0.003	0.007
PCD	Boriatico	Enclave	NIS304b	rim	m	Younger PCD system	50.52	0.71	4.72	0.04	2.1	6.13	0.18		15.21	20.51	0.29	0	100.41		1.859	0.141	0	0		0.834	0.189	0.058	0.063	0.02	0.001		0.006	0.808	0.021	0		13.3171	42.6621	44.0208	1.83	0.04		0.02	0.053	0.049	0	0.001	0.01
PCD	Boriatico	Enclave	NIS304b	core	m	Younger PCD system	49.53	0.2	6.04	0.06	3.64	3.22	0.16		15.11	21.4	0.36	0	99.72		1.825	0.175	0	0		0.83	0.099	0.101	0.087	0.006	0.002		0.005	0.845	0.026	0		10.9189	44.9352	44.1459	1.77	0.05		0.006	0.076	0.088	0	0.002	0.011
PCD	Boriatico	Enclave	NIS304b	core	gdm	Younger PCD system	48.54	0.33	5.54	0	5.23	5.42	0.18		14.24	19.79	0.43	0	99.7		1.811	0.189	0	0		0.792	0.169	0.147	0.055	0.009	0		0.006	0.791	0.031	0		16.8914	41.5296	41.579	1.75	0.06		0.009	0.046	0.124	0	0	0.008
PCD	Boriatico	Enclave	NIS304b	core	m	Younger PCD system	52.22	0.06	3.19	0.06	1.97	4.36	0.13		18.28	19.19	0.18	0	99.64		1.908	0.092	0	0		0.996	0.133	0.054	0.045	0.002	0.002		0.004	0.751	0.013	0		9.8713	38.758	51.3707	1.88	0.03		0.002	0.04	0.048	0	0.002	0.005
PCD	Boriatico	Enclave	NIS324	core	m	Younger PCD system	49.34	1.1	5.33	0	4.3	4.04	0.2		14.65	21.97	0.3	0.03	101.26		1.807	0.193	0	0		0.8	0.124	0.118	0.037	0.03	0		0.006	0.862	0.021	0.001		13.0062	45.1257	41.8681	1.79	0.04		0.03	0.031	0.101	0	0	0.005
Footnotes: ph= phenocryst; mph=micro-phenocryst; m=microlite; gdm= crystals of the groundmass.
[truncated: 16 more columns]

## Sheet: TableS4-P-T results on amph
Supplementary Table S4 - P-T results for clinopyroxene from geothermobarometer of Ridolfi, 2020 and Higgins et al., 2022
							Higgins et al., 2022					Ridolfi, 2020
							Predictions
Activity	Deposit	Type	sample		Mg#		P	std	T	std		T	std	P	std	ΔNNO	std		logfO2	H2Omelt	std
							kbar	kbar	°C	°C		°C	°C	Gpa	Gpa					wt.%	wt.%		Mg/(Mg+Fe2+)
UP	Lag-breccia	Type-A	NIS420-18		0.630348		2	0.1	941	21.5		907.725	22	259.149	31.0979	0.449311	0.4		-11.2751	4.5168	0.767856	Tschermakitic pargasite	0.786411
UP	Lag-breccia	Type-A	NIS420-26		0.611938		2	1	941	24.5		927.483	22	324.383	38.9259	0.670237	0.4		-10.6907	4.87539	0.828816	Tschermakitic pargasite	0.810094
UP	Fallout	Type-A	NIS357		0.574585		2.2	0.5	850	15		821.65	22	138.638	16.6366	-0.514422	0.4		-13.9086	5.08742	0.864862	Mg-hornblende	0.680846
UP	Fallout	Type-A	NIS357		0.548088		2.1	0.25	899	38		883.59	22	208.682	25.0419	-1.16393	0.4		-13.3378	4.20851	0.715447	Tschermakitic pargasite	0.673986
UP	Fallout	Type-A	NIS357		0.543931		2	1.35	933	25		917.833	22	265.553	31.8663	-1.27575	0.4		-12.8231	4.41327	0.750255	Tschermakitic pargasite	0.664251
UP	Fallout	Type-A	NIS357		0.639879		2	0.45	817	25		771.826	22	103.613	12.4335	0.331316	0.4		-14.1412	5.77245	0.981317	Mg-hornblende	0.759585
UP	Fallout	Type-A	NIS357		0.564277		2.2	0.35	856	21		812.344	22	141.082	16.9298	-0.375053	0.4		-13.9592	5.11337	0.869274	Mg-hornblende	0.674538
UP	Fallout	Type-A	NIS369a		0.628738		2	0.2	850	6		865.15	22	202.309	24.2771	0.942551	0.4		-11.5747	4.99637	0.849383	Mg-hornblende	0.8249
UP	Fallout	Type-A	NIS369a		0.646472		2	0.25	862	25		883.425	22	275.303	33.0364	1.25464	0.4		-10.8957	6.16986	1.04888	Tschermakitic pargasite	0.871974
UP	Fallout	Type-A	NIS369a		0.686311		2.1	0.45	810	29.5		785.666	22	105.935	12.7122	1.6257	0.4		-12.5402	5.71233	0.971097	Mg-hornblende	0.857191
UP	Fallout	Type-A	NIS369a		0.629258		2.3	1.05	912	41.5		931.644	22	361.405	43.3686	0.322201	0.4		-10.9548	5.71952	0.972318	Tschermakitic pargasite	0.801856
UP	Fallout	Type-A	NIS368d		0.613993		2	0.3	920	36.5		895.73	22	222.066	26.6479	0.930887	0.4		-11.0193	4.52859	0.76986	Tschermakitic pargasite	0.764841
UP	Lag-breccia	Type-B	NIS424		0.618481		2	0.5	917	41		916.876	22	306.425	36.7709	0.890784	0.4		-10.6572	5.49123	0.933509	Tschermakitic pargasite	0.791877
UP	Lag-breccia	Type-B	NIS424		0.612495		4.1	1.65	950	16.5		943.828	22	400.818	48.0982	1.02895	0.4		-10.0318	5.55549	0.944433	Tschermakitic pargasite	0.823582
UP	Lag-breccia	Type-B	NIS424		0.602791		2	0.85	900	38.5		914.102	22	299.605	35.9526	0.708954	0.4		-10.8893	5.27177	0.8962	Tschermakitic pargasite	0.808933
UP	Lag-breccia	Type-B	NIS424		0.665126		2.2	0.4	866	15.5		828.953	22	149.457	17.9348	1.69768	0.4		-11.5443	5.47713	0.931112	Mg-hornblende	0.832128
UP	Lag-breccia	Type-B	NIS424		0.653354		2.2	0.25	850	10		842.673	22	162.074	19.4489	1.2279	0.4		-11.7368	5.15324	0.87605	Mg-hornblende	0.896081
UP	Lag-breccia	Type-B	NIS430		0.614003		2	0.25	850	15		856.345	22	183.349	22.0018	0.0202359	0.4		-12.6715	4.8257	0.820368	Mg-hornblende	0.8205
UP	Lag-breccia	Type-B	NIS430		0.673682		4.1	0.9	973	17		1002.45	22	728.584	87.4301	1.10283	0.4		-8.92597	6.78636	1.15368	Tschermakitic pargasite	0.880604
UP	Lag-breccia	Type-B	NIS430		0.708963		5	1.5	910	39		949.208	22	464.689	55.7627	1.65834	0.4		-9.29084	6.59287	1.12079	Tschermakitic pargasite	0.996868
UP	Lag-breccia	Type-C	NIS426		0.669167		2.8	0.65	850	19		849.293	22	250.706	30.0848	1.51083	0.4		-11.2888	7.49862	1.27477	Mg-hornblende	0.834988
UP	Lag-breccia	Type-C	NIS426		0.576876		2.1	0.25	850	21		886.356	22	241.484	28.978	-0.484353	0.4		-12.5951	5.01799	0.853057	Tschermakitic pargasite	0.776063
UP	Lag-breccia	Type-C	NIS428		0.650128		2.5	0.5	850	9.5		832.18	22	163.205	19.5846	0.686594	0.4		-12.4851	5.6435	0.959395	Mg-hornblende	0.843977
UP	Lag-breccia	Type-C	NIS428		0.617588		2.3	0.5	858	15.5		815.977	22	131.554	15.7864	0.480483	0.4		-13.0327	4.98875	0.848087	Mg-hornblende	0.743534
UP	Lag-breccia	Type-C	NIS428		0.598861		2	0.15	858	20		895.237	22	257.039	30.8447	0.118963	0.4		-11.8262	5.35562	0.910455	Tschermakitic pargasite	0.79912
UP	Lag-breccia	Type-C	NIS428		0.749957		2.1	0.85	983	15		1002.68	22	726.777	87.2132	2.14897	0.4		-7.87719	7.5193	1.27828	Mg-hastingsite	0.89998
UP	Lag-breccia	Type-C	NIS428		0.600092		2	0.4	882	35		882.625	22	278.391	33.4069	0.643568	0.4		-11.5201	6.18849	1.05204	Tschermakitic pargasite	0.750779
UP	Lag-breccia	Type-C	NIS428		0.617787		2	0.35	858	17.5		850.188	22	161.332	19.3598	0.231707	0.4		-12.5872	4.86899	0.827729	Mg-hornblende	0.767967
PCD	Profitis Elias	Enclave	NIS297		0.700322		5.3	1.5	984	25		933.911	22	537.97	64.5564	3.17203	0.4		-7.99995	9.13177	1.5524	Tschermakitic pargasite	0.970709
PCD	Profitis Elias	Enclave	NIS287b		0.735704		4	1.35	977	21.5		964.138	22	459.403	55.1283	2.24364	0.4		-8.46885	6.40697	1.08919	Tschermakitic pargasite	0.952222
PCD	Profitis Elias	Enclave	NIS293b		0.716931		5.5	2.1	950	33.5		931.519	22	428.164	51.3797	2.74547	0.4		-8.50816	6.92222	1.17678	Tschermakitic pargasite	0.979464
PCD	Profitis Elias	Enclave	NIS293b		0.599961		3.5	1.75	948	19		933.552	22	332.355	39.8827	1.26053	0.4		-9.99577	5.00395	0.850671	Mg-hastingsite	0.771974
PCD	Profitis Elias	Enclave	NIS293b		0.788293		6.5	2.9	986	19		964.356	22	500.233	60.0279	3.34997	0.4		-7.3439	6.5222	1.10877	Tschermakitic pargasite	0.998899
PCD	Profitis Elias	Enclave	NIS293b		0.774675		7	3.55	1014	18		1036.57	22	1106.67	132.8	4.57458	0.4		-4.83083	7.87373	1.33853	Mg-hastingsite	0.931074
PCD	Profitis Elias	Enclave	NIS293b		0.77654		2.8	1.8	997	19		1014.2	22	811.583	97.39	3.05471	0.4		-6.77251	7.73956	1.31572	Mg-hastingsite	0.972976
PCD	Profitis Elias	Enclave	NIS293b		0.764117		5	2.2	990	19.5		984.147	22	576.416	69.1699	3.2765	0.4		-7.0823	6.52435	1.10914	Tschermakitic pargasite	0.998195
PCD	Profitis Elias	Enclave	NIS293b		0.768924		3.5	2	994	23		1026.3	22	1112.46	133.495	3.82315	0.4		-5.72406	10.0059	1.701	Mg-hastingsite	0.896221
PCD	Profitis Elias	Enclave	NIS293b		0.751608		2.5	1.5	983	17.5		1015.49	22	709.869	85.1843	3.04504	0.4		-6.79986	6.4181	1.09108	Mg-hastingsite	0.955714
PCD	Profitis Elias	Enclave	NIS293b		0.730949		5	2	989	20.5		1038.19	22	1134.56	136.147	3.53672	0.4		-5.83643	8.44494	1.43564	Mg-hastingsite	0.915346
PCD	Profitis Elias	Enclave	NIS293b		0.773745		3	1.5	1010	29		1009.57	22	767.889	92.1467	3.80076	0.4		-6.10943	7.96817	1.35459	Mg-hastingsite	0.999848
PCD	Profitis Elias	Enclave	NIS293b		0.742003		5	1.75	994	17.5		1002.16	22	769.626	92.3551	3.62591	0.4		-6.3924	7.41666	1.26083	Mg-hastingsite	0.985491
PCD	Profitis Elias	Enclave	NIS293b		0.774233		2.1	0.8	967	24		942.96	22	352.386	42.2863	3.10967	0.4		-7.98361	5.39757	0.917588	Mg-hastingsite	0.905902
PCD	Trapesina	Enclave	NIS278b		0.709405		2.1	0.65	969	19		959.26	22	401.11	48.1331	1.95658	0.4		-8.85501	5.51011	0.936718	Tschermakitic pargasite	0.917597
PCD	Trapesina	Enclave	NIS278b		0.791025		3.1	1.4	961	20.5		941.104	22	357.128	42.8554	2.82467	0.4		-8.29728	6.11578	1.03968	Tschermakitic pargasite	0.947022
PCD	Trapesina	Enclave	NIS278b		0.799638		4.7	2	972	21.5		945.545	22	413.62	49.6343	3.38436	0.4		-7.64355	7.35528	1.2504	Mg-hastingsite	0.91986
PCD	Trapesina	Enclave	NIS283		0.640624		2.1	0.5	881	24.5		859.56	22	160.292	19.2351	0.957943	0.4		-11.6819	4.20859	0.715461	Mg-hornblende	0.772342
PCD	Trapesina	Enclave	NIS283		0.65012		3.3	1.1	875	25		834.381	22	139.323	16.7187	1.50253	0.4		-11.6352	4.49886	0.764807	Mg-hornblende	0.770205
PCD	Trapesina	Enclave	NIS283		0.799015		4.3	1.75	961	19		929.992	22	377.928	45.3514	3.25765	0.4		-8.04069	6.66059	1.1323	Mg-hastingsite	0.930819
PCD	Trapesina	Enclave	NIS283		0.759563		4	1.4	975	21.5		934.458	22	438.16	52.5791	3.16538	0.4		-8.03555	7.68177	1.3059	Tschermakitic pargasite	0.970686
PCD	Trapesina	Enclave	NIS283		0.609364		2.5	1.25	881	25.5		861.11	22	199.322	23.9187	2.15303	0.4		-10.4416	5.29059	0.8994	Mg-hastingsite	0.713954
PCD	Trapesina	Enclave	NIS283		0.679877		4.1	1.15	977	18		932.394	22	419.543	50.3452	2.22605	0.4		-9.01629	6.92789	1.17774	Tschermakitic pargasite	0.89954
PCD	Trapesina	Enclave	NIS283		0.782331		4	1.6	980	16		962.91	22	467.647	56.1176	3.11024	0.4		-7.61859	6.64405	1.12949	Tschermakitic pargasite	0.994963
PCD	Trapesina	Enclave	NIS283		0.605936		4	1.8	894	44.5		916.536	22	370.243	44.4291	1.4628	0.4		-10.0663	6.51184	1.10701	Mg-hastingsite	0.764982
PCD	Nifios	Enclave	NIS288		0.673094		4.1	1.6	982	19		959.715	22	474.813	56.9775	1.71731	0.4		-9.05952	6.57622	1.11796	Tschermakitic pargasite	0.876404
PCD	Karaviotis	Enclave	NIS264b		0.760576		2.4	0.7	975	14.5		994.972	22	678.97	81.4765	2.72693	0.4		-7.431	7.66127	1.30242	Tschermakitic pargasite	0.967932
PCD	Karaviotis	Enclave	NIS264b		0.63426		2.8	1.5	900	39		889.496	22	270.797	32.4956	1.88896	0.4		-10.1535	5.98935	1.01819	Mg-hastingsite	0.743203
PCD	Karaviotis	Enclave	NIS264b		0.704939		3.6	1.5	975	15		995.73	22	665.133	79.8159	2.04642	0.4		-8.10519	7.14374	1.21444	Mg-hastingsite	0.907558
PCD	Karaviotis	Enclave	NIS264b		0.613102		3.5	1.7	862	28		858.312	22	255.376	30.6451	1.85659	0.4		-10.7684	8.03773	1.36641	Tschermakitic pargasite	0.799043
PCD	Karaviotis	Enclave	NIS267b		0.737346		4.7	2.1	963	23.5		940.544	22	465.189	55.8226	2.70969	0.4		-8.38051	7.50476	1.27581	Tschermakitic pargasite	0.916391
PCD	Karaviotis	Enclave	NIS267b		0.654181		4.5	1.35	975	27.5		972.222	22	615.055	73.8066	2.42108	0.4		-8.10709	7.86454	1.33697	Tschermakitic pargasite	0.922063
PCD	Karaviotis	Enclave	NIS267b		0.683498		4.1	1.15	982	18.5		975.639	22	494.293	59.3152	3.3639	0.4		-7.15582	6.33528	1.077	Tschermakitic pargasite	0.979222
PCD	Karaviotis	Enclave	NIS266c		0.715084		4.5	1.85	974	21		942.025	22	430.678	51.6814	2.61471	0.4		-8.46427	6.66486	1.13303	Tschermakitic pargasite	0.999141
PCD	Boriatico	Enclave	NIS310b		0.730802		4.7	1.65	970	20		981.168	22	640.404	76.8484	3.12423	0.4		-7.25666	7.1656	1.21815	Tschermakitic pargasite	0.954581
PCD	Boriatico	Enclave	NIS310b		0.681354		3.5	1.4	975	19		938.736	22	395.144	47.4173	2.23142	0.4		-8.91511	5.83061	0.991203	Tschermakitic pargasite	0.92906
PCD	Boriatico	Enclave	NIS310b		0.638181		2.7	1.25	948	19		952.409	22	382.156	45.8588	1.63071	0.4		-9.29778	5.23386	0.889757	Tschermakitic pargasite	0.853738
PCD	Boriatico	Enclave	NIS310b		0.669613		2	0.1	946	15		914.387	22	289.877	34.7852	1.71117	0.4		-9.88596	5.49665	0.93443	Tschermakitic pargasite	0.921197
PCD	Boriatico	Enclave	NIS310b		0.664402		3.8	1.95	976	23		951.049	22	407.227	48.8673	2.11631	0.4		-8.82471	5.51921	0.938266	Tschermakitic pargasite	0.882062
PCD	Boriatico	Enclave	NIS310b		0.697993		7	2.5	959	26		967.473	22	610.054	73.2065	3.99077	0.4		-6.61334	6.8664	1.16729	Tschermakitic pargasite	0.986743
PCD	Boriatico	Enclave	NIS310b		0.675158		4.1	1.15	969	21		978.51	22	518.153	62.1784	2.02983	0.4		-8.43675	6.18805	1.05197	Tschermakitic pargasite	0.923981
PCD	Boriatico	Enclave	NIS310b		0.695735		2	0.15	955	18.5		940.808	22	326.925	39.231	1.85764	0.4		-9.28062	5.10339	0.867576	Tschermakitic pargasite	0.950415
PCD	Boriatico	Enclave	NIS310b		0.662949		3.5	1.45	956	24		933.304	22	375.9	45.108	2.2603	0.4		-8.98354	5.93811	1.00948	Tschermakitic pargasite	0.945628
PCD	Boriatico	Enclave	NIS310b		0.647608		2.1	0.55	945	20		913.188	22	327.582	39.3098	1.14577	0.4		-10.4574	6.0819	1.03392	Tschermakitic pargasite	0.823105
PCD	Boriatico	Enclave	NIS324		0.705099		4	2.25	982	17		993.642	22	634.944	76.1933	2.62221	0.4		-7.57162	6.46769	1.09951	Tschermakitic pargasite	0.943413
PCD	Boriatico	Enclave	NIS324		0.720941		2.5	2	968	20		958.365	22	399.254	47.9105	2.61171	0.4		-8.21484	5.16124	0.877411	Tschermakitic pargasite	0.972033
PCD	Boriatico	Enclave	NIS324		0.673257		2.1	1.4	972	28.5		959.563	22	393.378	47.2054	2.24973	0.4		-8.55991	5.27624	0.89696	Mg-hastingsite	0.806947
PCD	Boriatico	Enclave	NIS324		0.682982		5.4	2.4	954	29		934.784	22	375.226	45.0272	3.96784	0.4		-7.25165	5.39816	0.917687	Mg-hastingsite	0.863595
PCD	Boriatico	Enclave	NIS324		0.74052		2.4	0.95	974	20		954.894	22	400.921	48.1105	2.55764	0.4		-8.32384	5.61275	0.954168	Tschermakitic pargasite	0.947121
PCD	Boriatico	Enclave	NIS324		0.703138		3.9	2.5	974	21		959.871	22	410.965	49.3158	3.00961	0.4		-7.78857	5.45748	0.927772	Tschermakitic pargasite	0.953883
PCD	Boriatico	Enclave	NIS324		0.746292		4.8	2	982	17.5		974.595	22	610.228	73.2274	3.83239	0.4		-6.66077	7.359	1.25103	Tschermakitic pargasite	0.987069
PCD	Boriatico	Enclave	NIS324		0.671231		3.4	2	970	23.5		946.886	22	390.131	46.8157	2.43025	0.4		-8.58468	5.59074	0.950426	Mg-hastingsite	0.843734
PCD	Boriatico	Enclave	NIS324		0.731974		4.5	2	972	22.5		992.802	22	633.388	76.0066	2.6356	0.4		-7.57142	6.80842	1.15743	Tschermakitic pargasite	0.957666

[truncated: 1 more sheets: TableS5]
