# Supplementary material for: Changing magma dynamics and plumbing system architecture at an explosive–effusive transition: the case of Nisyros volcano (Greece)
Source: Copernicus journal article supplement (doi:10.5194/ejm-37-793-2025), 2025-10-22
Supplement: Supplementary file [file ejm-37-793-2025-supplement-title-page.pdf › ejm-37-793-2025-supplement-title-page.pdf]

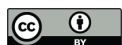

*Supplement of*

**Changing magma dynamics and plumbing system architecture at an explosive–effusive transition: the case of Nisyros volcano (Greece)**

**Eleonora Braschi et al.**

*Correspondence to:* Eleonora Braschi ([eleonora.braschi@igg.cnr.it](mailto:eleonora.braschi@igg.cnr.it))

- [ejm-37-793-2025-supplement-title-page.pdf](#)
- [Supplementary Tables Captions.pdf](#)
- [SupplementaryTables S1-S5.xlsx](#)
- [Supplementary Material.pdf](#)

The copyright of individual parts of the supplement might differ from the article licence.
